# Supplementary material for: Ambulacrarian insulin-related peptides and their putative receptors suggest how insulin and similar peptides may have evolved from insulin-like growth factor
Source: PeerJ journal article supplement (doi:10.7717/peerj.11799), 2021-07-14
Supplement: SupplData.pdf [file SupplData.pdf]

Supplementary data for:

# **Ambulacrarian insulin-related peptides and their putative receptors suggest how insulin and similar peptides may have evolved from Insulin-like Growth Factor**

by Jan A. Veenstra

## **Content**

Spreadsheet 1 contains contains protein sequences for various insulin-like peptides and their putative precursors, as well as their genbank accession numbers or the terms Artemis or Trinity. Artemis indicates that the sequence in question was derived from a genome assembly, Trinity that the sequence was obtained using the Trinity program on a collection of transcriptome SRAs. In a few instances a combination of Trinity and Artemis was used to obtain a sequence.

Spreadsheet 2 contains the expression of some of these genes for a more limited number of species (there is little sense if the only transcriptome SRAs available for a species are from whole animals of unknown sex and unknown physiological status, or when then there are only very few such SRAs). The data contain the SRA identifier, the number of spots of each SRA and then for each protein of interest two numbers, one in blue, which is number of half spots that contains coding sequence of the protein of interest. The second number in black is the blue number multiplied by 1,000,000 and divided by the number of total spots, which yields a relative number.

The content of the remainder of this document is listed below:

|                                                                     |    |
|---------------------------------------------------------------------|----|
| The SRAs used in this study.                                        | 2  |
| Figure S1. Sequences alignment of ambulacrarian IGFs.               | 6  |
| Figure S2. Sequence similarity tree of ambulacrarian IGFs.          | 12 |
| Figure S3. Sequence alignment of ambulacrarian GSSs.                | 13 |
| Figure S4. Phylogenetic tree of ambulacrarian GSSs.                 | 14 |
| Figure S5. Sequence alignment of dilp7 orthologs.                   | 15 |
| Figure S6. Phylogenetic tree of ambulacrarian dilp7 orthologs.      | 16 |
| Figure S7. Sequence alignment of ambulacrarian octinsulins.         | 17 |
| Figure S8. Phylogenetic tree of ambulacrarian octinsulins.          | 19 |
| Figure S9. Sequence allignment of ambulacrarian multinsulins.       | 20 |
| Figure S10. Sequence similarity tree of ambulacrarian multinsulins. | 24 |
| Figure S11. Phylogenetic tree of bursicon and GPA2/GPB5 receptors.  | 25 |
| Figure S12. Sequence alignment of various gonadulin receptors.      | 26 |
| Figure S13. Sequence alignment of dilp7 receptors.                  | 28 |
| Figure S14. Sequence alignment GRL101 receptors.                    | 32 |

## **SRAs used in the analysis:**

### ***Anneissia japonica***

SRR9663012, SRR9663013, SRR9663014, SRR9663015, SRR9663016, SRR9663017, SRR9663018, SRR9663019, SRR9663020, SRR9663021, SRR9663022, SRR9663023, SRR9663024, SRR9663025, SRR9663026, SRR9663027, SRR9663028, SRR9663029, SRR9663030, SRR9663031, SRR9663032, SRR9663033, SRR9663034, SRR9663035, SRR9663036, SRR9663037, SRR9663038, SRR9663039, SRR9663040, SRR9663041, SRR9663042, SRR9897705, SRR9897706, SRR9897707, SRR9897708, SRR9897709, SRR9897710, SRR9897711, SRR9897712, SRR9897713, SRR9897714, SRR9897715, SRR9897716, SRR9897717, SRR9897718, SRR9897719, SRR9897720, SRR9897721 and SRR9897722.

### ***Antedon mediterranea***

SRR6650067.

### ***Apostichopus japonicus***

ERR1193930, ERR1193931, ERR1193932, SRR166825, SRR414926, SRR414927, SRR414929, SRR414930, SRR771602, SRR771603, SRR771604, SRR771605, SRR771606, SRR863579, SRR934650, SRR934651, SRR1002331, SRR1002332, SRR1002333, SRR1657913, SRR1657914, SRR1657915, SRR1657916, SRR1657917, SRR1657918, SRR1657919, SRR1657920, SRR1657921, SRR1657922, SRR1657923, SRR1657924, SRR1657925, SRR1663411, SRR1663428, SRR1663429, SRR1663431, SRR1663432, SRR1663433, SRR1663436, SRR1663437, SRR1663438, SRR1663439, SRR1663440, SRR2006096, SRR2006097, SRR2006098, SRR2006099, SRR2006100, SRR2006101, SRR2006102, SRR2006103, SRR2006104, SRR2010219, SRR2012319, SRR2012383, SRR2012397, SRR2012405, SRR2014140, SRR2014144, SRR2014145, SRR2014150, SRR2014151, SRR2014153, SRR2014166, SRR2034609, SRR2089767, SRR2128001, SRR2128002, SRR5083072, SRR5083073, SRR5083074, SRR5083075, SRR5083077, SRR5083078, SRR5083079, SRR5083080, SRR5083082, SRR5083083, SRR5083084, SRR5083085, SRR5083086, SRR5083087, SRR5083088, SRR5817185, SRR5817186, SRR5817187, SRR5817188, SRR5817189, SRR5817191, SRR5817192, SRR5817193, SRR5817194, SRR5817195, SRR5817196, SRR5817197, SRR5817198, SRR5817199, SRR5817200, SRR5817201, SRR5817202, SRR5817203, SRR5817204, SRR5817205, SRR5817287, SRR5817295, SRR5839517, SRR5839518, SRR5839536, SRR5839538, SRR5839540, SRR5839546, SRR5839650, SRR5839684, SRR5839694, SRR5839713, SRR5839720, SRR5839725, SRR5839728, SRR5839730, SRR5839731, SRR5839732, SRR5839733, SRR5839734, SRR5839798, SRR5839799, SRR5839800, SRR5839801, SRR5839814, SRR5839840, SRR5839889, SRR5839890, SRR5839891, SRR5839892, SRR5839893, SRR5839897, SRR5839899, SRR5839900, SRR5839901, SRR5839902, SRR5839903, SRR5839904, SRR5839949, SRR5839950, SRR5839951, SRR5839952, SRR5839953, SRR5839954, SRR5840021, SRR5840022, SRR5840023, SRR5840024, SRR5840025, SRR5840027, SRR6004440, SRR6004441, SRR6004442, SRR6004443, SRR6004444, SRR6004445, SRR6004446, SRR6004447, SRR6004448, SRR6075435, SRR6075436, SRR6075437, SRR6075438, SRR6378158, SRR6856564, SRR6856565, SRR6856566, SRR6856567, SRR6856568, SRR6856569, SRR8258074, SRR8258075, SRR8258076, SRR8258077, SRR8258078, SRR8258079, SRR8258080, SRR8258081, SRR8258082, SRR8279868, SRR8801559, SRR8801560, SRR8801561, SRR8801562, SRR8801563, SRR8801564, SRR8801565, SRR8801566, SRR8801567, SRR9670443, SRR9670444, SRR9670445, SRR9670446, SRR9670447, SRR9670448, SRR9670449, SRR9670450, SRR9670451, SRR9670452, SRR9670453, SRR9670454, SRR9670455, SRR9670456, SRR9670457, SRR9670458, SRR9670459, SRR9670460, SRR9670461, SRR9670462, SRR9670463, SRR9670464, SRR9670465, SRR9670466, SRR9670467, SRR9670468, SRR9670469, SRR9670470, SRR9670471, SRR9670472, SRR9670473, SRR9670474, SRR9670475, SRR9670476, SRR9670477, SRR9670478, SRR9670479, SRR9670480, SRR9670481, SRR9670482, SRR9670483, SRR9670484, SRR9670485, SRR9670486, SRR9670487, SRR9670488, SRR9670489, SRR9670490, SRR11793939, SRR11793942, SRR11793943, SRR11793944, SRR12505006, SRR12505011, SRR12505013, SRR12505016, SRR12505017, SRR12830751 and SRR12830752.

### ***Asterias rubens***

SRR3087891.

***Florometra serratissima***

SRR3097584.

***Holothuria scabra***

SRR9125585.

***Holothuria arguensis***

SRR8889053, SRR8892978, SRR8893063, SRR8896868, SRR8896869, SRR8898365, SRR8898366, SRR8906597 and SRR8906598.

***Lytechinus variegatus***

SRR1139214, SRR1661401, SRR1661399, SRR1661397, SRR1661409, SRR1661406, SRR1661395, SRR1661363, SRR1661081, SRR1661075, SRR1661113, SRR1660833, SRR1661077, SRR1661079, SRR1660831, SRR1661112, SRR1661111, SRR1661090, SRR9673387, SRR9673388, SRR9673385, SRR9673386, SRR9673383, SRR9673384, SRR9673381, SRR9673382, SRR9673389, SRR9673390, SRR9673407, SRR9673408, SRR9673409, SRR9673410, SRR9673403, SRR9673404, SRR9673405, SRR9673406, SRR9673401, SRR9673402, SRR9673391, SRR9673392, SRR9673393, SRR9673394, SRR9673395, SRR9673396, SRR9673397, SRR9673398, SRR9673399, SRR9673400, SRR9673379, SRR9673380, SRR9673377, SRR9673378, SRR9673375 and SRR9673376.

***Mesocentrotus nudus***

SRR6438347, SRR6438348, SRR6438349, SRR6438350, SRR6438351 and SRR6438352.

***Oligometra serripinna***

SRR2845424.

***Ophioderma brevispina***

SRR10742213.

***Patiria miniata***

SRR1138704, SRR1138705, SRR1138706, SRR1138707, SRR1138708, SRR1139189, SRR1139190, SRR1139191, SRR1139193, SRR1139194, SRR1139195, SRR1139196, SRR1139197, SRR1139198, SRR1139199, SRR1139201, SRR1139214, SRR1139215, SRR1139455, SRR2454338, SRR5398132, SRR5398133, SRR5398134, SRR5398135, SRR5398136, SRR5398137, SRR5398138, SRR5398139, SRR5398140, SRR5398141, SRR5398142, SRR5398143, SRR5398144, SRR5398145, SRR5398146, SRR5398147, SRR5398148, SRR5398149, SRR5986254, SRR6054712, SRR8580044, SRR8580045, SRR8580046, SRR8580047, SRR8580048, SRR8580049, SRR8580050, SRR8580051, SRR8580052, SRR8580053, SRR8580054, SRR8580055, SRR8580056, SRR8580057, SRR8580058, SRR8580059, SRR8580060, SRR8580061, SRR8580062, SRR8580063, SRR8580064, SRR8580065, SRR8580066, SRR8926376, SRR8926377, SRR12983012, SRR12983013, SRR12983014, SRR12983015, SRR12983016, SRR12983017, SRR12983018, SRR12983019, SRR12983020, SRR12983021, SRR12983022, SRR12983023, SRR12983024, SRR12983025, SRR12983026, SRR12983027, SRR12983028, SRR12983029, SRR12983030, SRR12983031, SRR12983032, SRR12983033, SRR12983034, SRR12983035 and SRR12983036.

***Patiria pectinifera***

SRR1139200, SRR1141045, SRR5229423, SRR5229424, SRR5229425, SRR5229426, SRR5229427, SRR5229428, SRR8627925 and SRR8627926.

***Pisaster ochraceus***

SRR1139197, SRR2846074, SRR10982207, SRR10982208, SRR10982209, SRR10982210, SRR10982211, SRR10982212, SRR10982213, SRR10982214, SRR10982215, SRR10982216, SRR10982217, SRR10982218, SRR10982219, SRR10982220, SRR10982221, SRR10982222, SRR10982223, SRR10982224, SRR10982225, SRR10982226, SRR10982227, SRR10982228, SRR10982229, SRR10982230, SRR10982231, SRR10982232, SRR10982233, SRR10982234, SRR10982235, SRR10982236, SRR10982237, SRR10982238, SRR10982239, SRR10982240, SRR10982241, SRR10982242, SRR10982243, SRR10982244, SRR10982245, SRR10982246, SRR10982247, SRR10982248, SRR10982249, SRR10982250, SRR10982251, SRR10982252, SRR10982253, SRR10982254, SRR10982255, SRR10982256, SRR11293187 and SRR11293188.

***Ptychodera flava***

SRR1029584, SRR2033704, SRR2033705, SRR2033710, SRR2033711, SRR2033712, SRR2033714, SRR2033715, SRR2033716, SRR2033717, SRR2033718, SRR2033719, SRR2033720, SRR2033721, SRR2033722, SRR2033723, SRR2033724, SRR2033725, SRR2033726, SRR2033727, SRR2033728, SRR2033729, SRR2033730, SRR2033731, SRR2033732, SRR2033733, SRR2033734, SRR2033735, SRR2033736, SRR2033737, SRR2033738, SRR2033739, SRR2033740, SRR2033741, SRR2033742, SRR2033743, SRR2033744, SRR2033745, SRR2033746, SRR2079098, SRR2079099, SRR2079100, SRR2079101, SRR2079102, SRR2079103, SRR2079104, SRR2079105, SRR2079106, SRR2079107, SRR2079108, SRR2079109, SRR2079110, SRR2079111, SRR2079112, SRR2079113, SRR2079114, SRR2079115, SRR2079116, SRR2079117, SRR2079118, SRR2079119, SRR2079120, SRR2079121, SRR2079122, SRR2079123, SRR2079124, SRR2079125, SRR2079126, SRR2079127, SRR2079128, SRR2079129, SRR2079130, SRR2079131, SRR2079132, SRR2079133, SRR12736734, SRR12736735, SRR12736736, SRR12736737, SRR12736738, SRR12736739, SRR12736740, SRR12736741, SRR12736742, SRR12736743, SRR12736744, SRR12736745, SRR12736746, SRR12736747, SRR12736748, SRR12736749, SRR12736750, SRR12736751, SRR12736752, SRR12736753, SRR12736754, SRR12736755, SRR12736756, SRR12736757, SRR12736758, SRR12736759, SRR12736760, SRR12736761, SRR12736762, SRR12736763, SRR12736764, SRR12736765, SRR12736766, SRR12736767, SRR12736769, SRR12736770, SRR12736771, SRR12736772, SRR12736773, SRR12736774, SRR12736775, SRR12736776, SRR12736777, SRR12736778, SRR12736779, SRR12736780, SRR12736781, SRR12736782, SRR12736783 and SRR12736784.

***Saccoglossus kovalewskii***

SRR071700, SRR071701, SRR071702, SRR071703, SRR071704, SRR071705, SRR071706, SRR071707, SRR071708, SRR071709, SRR071710, SRR071711, SRR071712, SRR071713, SRR071714, SRR071715, SRR071716, SRR071717, SRR071718, SRR071719, SRR071720, SRR071721 and SRR071722.

***Schizocardium californicum***

SRR2921981 and SRR2922012.

***Strongylocentrotus purpuratus***

SRR409091, SRR409092, SRR409093, SRR409094, SRR409095, SRR409096, SRR505583, SRR505584, SRR505585, SRR505586, SRR505587, SRR505588, SRR505589, SRR531843, SRR531853, SRR531860, SRR531948, SRR531949, SRR531950, SRR531951, SRR531952, SRR531953, SRR531954, SRR531955, SRR531956, SRR531957, SRR531958, SRR531964, SRR531996, SRR532046, SRR532055, SRR532074, SRR532121, SRR532143, SRR532151, SRR533746, SRR1012313, SRR1012339, SRR1012340, SRR1012342, SRR1012401, SRR1012403, SRR1041572, SRR1041901, SRR1042009, SRR1043060, SRR1043069, SRR1139792, SRR1765910, SRR1765938, SRR1765978, SRR1765979, SRR1765980, SRR1765981, SRR1765982, SRR1765983, SRR1765984, SRR1765986, SRR1765988, SRR1765991, SRR2080791, SRR2080792, SRR2080793, SRR2080794, SRR2080795, SRR2080796, SRR2080797, SRR2080798, SRR2080799, SRR2080800, SRR2080801, SRR2080802, SRR2080803, SRR2080804, SRR2080805, SRR2080806, SRR2080807, SRR2080808, SRR2080809, SRR2080810, SRR2080811, SRR2080812, SRR2080813, SRR2080814, SRR2080815, SRR2080816, SRR2080817, SRR2080818, SRR2080819, SRR2080820, SRR2080821, SRR2080822, SRR2080823, SRR2080824, SRR2080825,

SRR2080826, SRR2080827, SRR2080828, SRR2080829, SRR2080830, SRR2080831, SRR2080832, SRR2080833, SRR2080834, SRR2080835, SRR2080836, SRR2080837, SRR2080838, SRR2080839, SRR2080840, SRR2080841, SRR2080842, SRR2080843, SRR2080844, SRR2080845, SRR2080846, SRR2080847, SRR2080848, SRR2080849, SRR2080850, SRR2080851, SRR2080852, SRR2080853, SRR2080854, SRR2080855, SRR2080856, SRR2080857, SRR2080858, SRR2080859, SRR2080860, SRR2080861, SRR2080862, SRR2080863, SRR2080864, SRR2080865, SRR2080866, SRR2080867, SRR2080868, SRR2080869, SRR2080870, SRR2080871, SRR2080872, SRR2080873, SRR2080874, SRR2080875, SRR2080876, SRR2080877, SRR2080878, SRR2080879, SRR2080880, SRR2080881, SRR2080882, SRR2080883, SRR2080884, SRR2080885, SRR2080886, SRR2080887, SRR2080888, SRR2080889, SRR2080890, SRR2080891, SRR2080892, SRR2080893, SRR2080894, SRR2080895, SRR2080896, SRR2080897, SRR2080898, SRR2080899, SRR2080900, SRR2080901, SRR2080902, SRR2080903, SRR2080904, SRR2080905, SRR2080906, SRR2080907, SRR2080908, SRR2080909, SRR2080910, SRR2080911, SRR2080912, SRR2080913, SRR2080914, SRR2080915, SRR2080916, SRR2080917, SRR2080918, SRR2080919, SRR2080920, SRR2080921, SRR2080922, SRR2080923, SRR2080924, SRR2080925, SRR2080926, SRR2080927, SRR2080928, SRR2080929, SRR2080930, SRR2080931, SRR2080932, SRR2080933, SRR2080934, SRR2080935, SRR2080936, SRR2080937, SRR2080938, SRR2080939, SRR2080940, SRR2080941, SRR2080942, SRR2080943, SRR2080944, SRR2080945, SRR2080946, SRR2080947, SRR2080948, SRR2080949, SRR2080950, SRR2080951, SRR2080952, SRR2080953, SRR2080954, SRR2080955, SRR3017856, SRR3017857, SRR3593587, SRR3593588, SRR3593589, SRR3593590, SRR3593591, SRR3593592, SRR3593593, SRR3593594, SRR3593595, SRR3593596, SRR3593597, SRR3593598, SRR3593599, SRR3593600, SRR3593601, SRR3593603, SRR3593604, SRR3593605, SRR3593607, SRR3593608, SRR3593610, SRR3593612, SRR3593613, SRR3593615, SRR3593616, SRR3593618, SRR3593619, SRR3593620, SRR8863027, SRR8863028, SRR8863029, SRR8863030, SRR8863031, SRR8863032, SRR8863033, SRR8863034, SRR8863035, SRR8863036, SRR8863037, SRR8863038, SRR8863039, SRR9595500, SRR9595501, SRR9595510, SRR9595511, SRR9595512, SRR9595513, SRR9595514, SRR9595515, SRR9595516, SRR9595517, SRR9595518, SRR9595519, SRR9693264, SRR9693265, SRR9693266, SRR10002625, SRR10002626, SRR10002627, SRR10002628, SRR10002629, SRR10002630, SRR10002631, SRR10002632, SRR10002633, SRR10002634, SRR10002635, SRR10002636, SRR10002637, SRR10002638, SRR10002639, SRR10002640, SRR10002641, SRR10002642, SRR10002643, SRR10002644, SRR10002645 and SRR10002646.

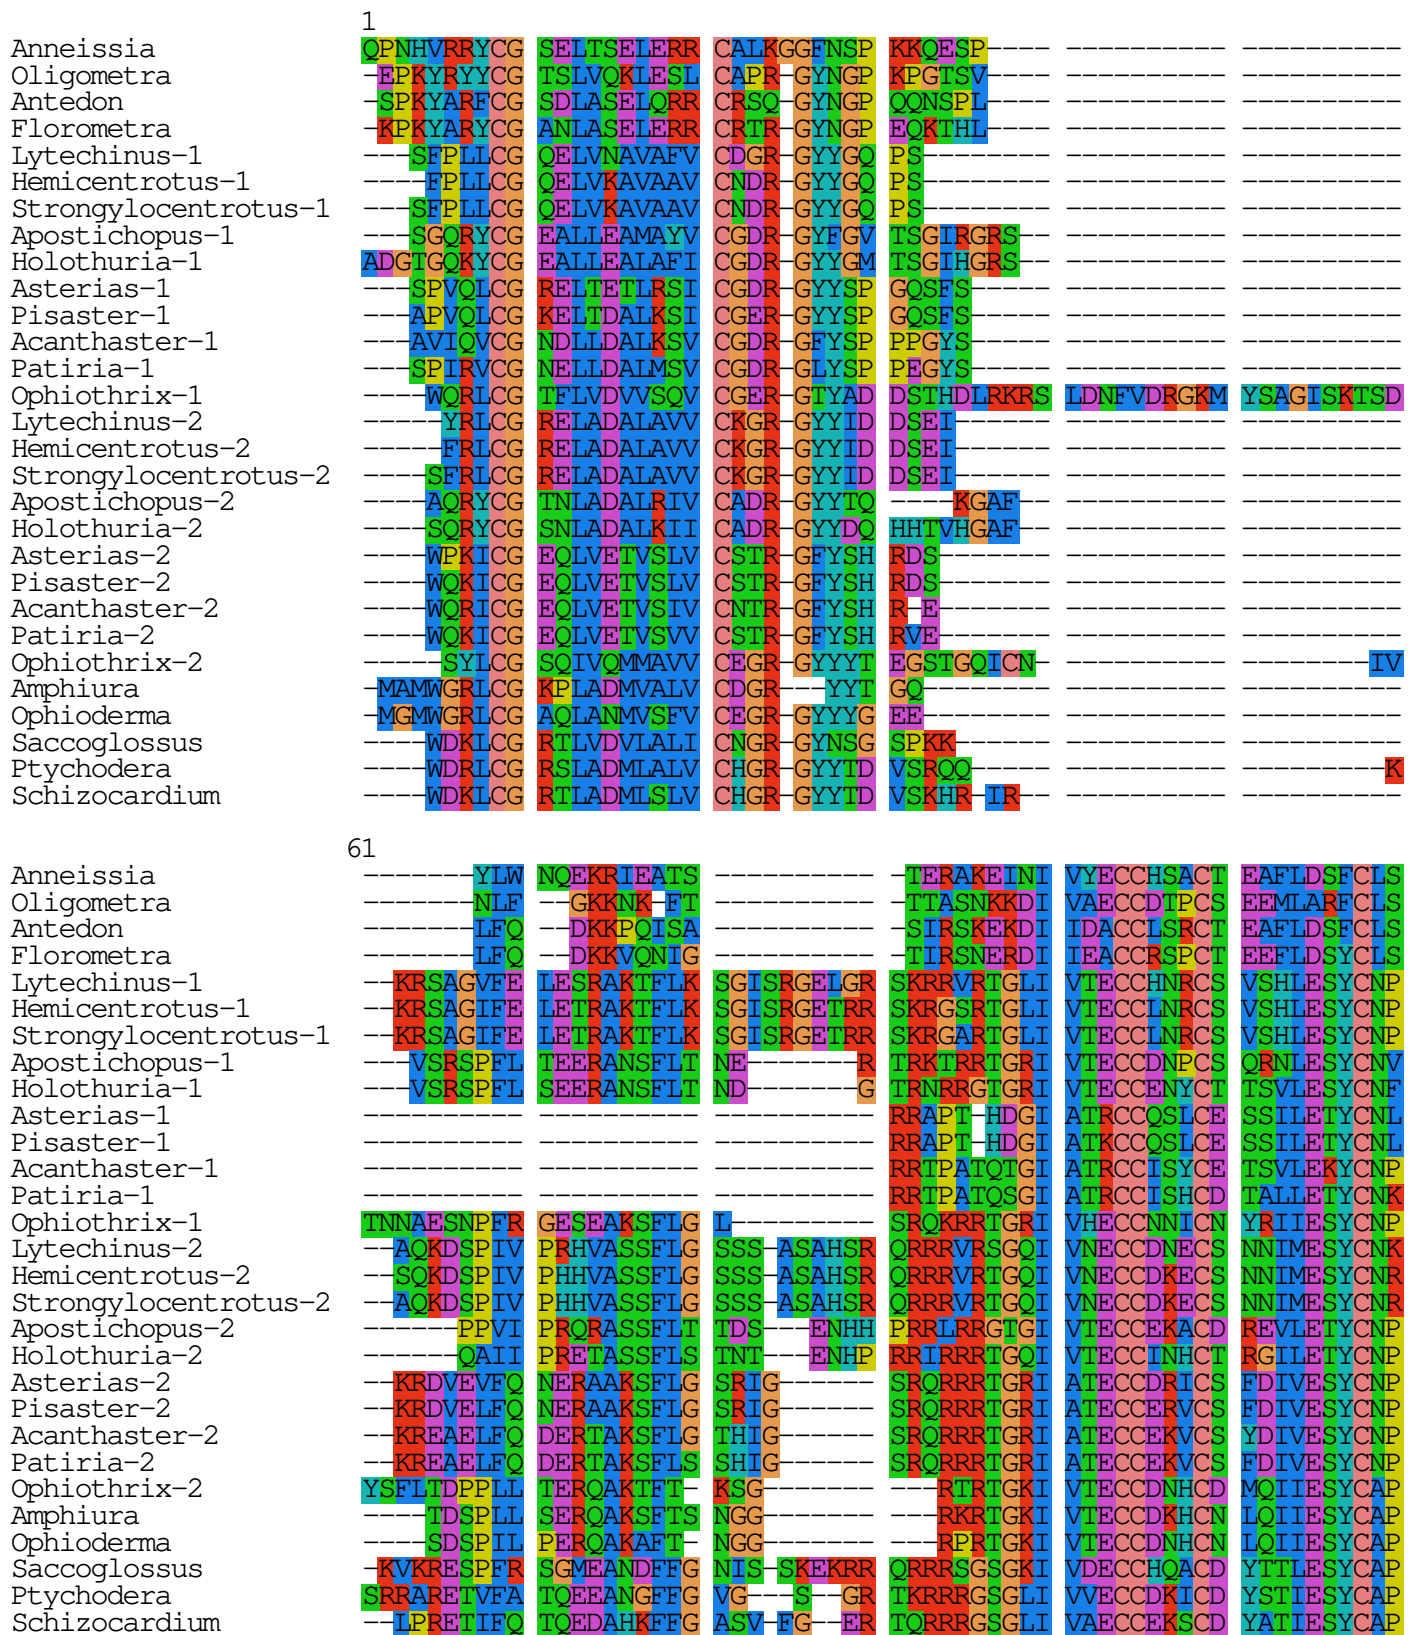

Figure S1. Sequences alignment of ambulacrarian IGFs. In order to illustrate the sequence similarities in the putative D- and E- domains of these molecules Seaview<sup>1</sup> was used.

<sup>1</sup> Gouy M, Guindon S, Gascuel O. 2010. SeaView version 4: A multiplatform graphical user interface for sequence alignment and phylogenetic tree building. Mol Biol Evol. 27:221-4. doi: 10.1093/molbev/msp259.

121

|                      |            |             |            |            |            |               |
|----------------------|------------|-------------|------------|------------|------------|---------------|
| Anneissia            | SNKDEDLIVE | SDIV        | ETTTITG    | KRRKPTRKPK | N-PLKS     |               |
| Oligometra           | PIPKDNLIVE | SEIM        | ETTTIVN    | TKKQRTKKP  | K-PTRK     |               |
| Antedon              | SNPEDDLIVE | SETI        | ETTTIVG    | SKKQLTKKP  | K-TTRK     |               |
| Florometra           | STPVDDITAE | LEIV        | ETTTLIG    | SKKPRTKKPK | S-DRRK     |               |
| Lytechinus-1         | LPODAV     | H           | DPE        | VH         | IRLEK      | SAEEDAD       |
| Hemicentrotus-1      | LQDAV      | H           | DAE        | VH         | IRLEK      | SAEEDADET     |
| Strongylocentrotus-1 | LPPDAV     | H           | DAE        | VH         | IRLEK      | SAEEDAD       |
| Apostichopus-1       | ATTQITEIPT | ELIT        | EGT        | TTEPA      | ASPRRNSR   | NIEADG TA     |
| Holothuria-1         | AT         | ELPT        | ERT        | TTEPS      | ASPRRNSR   | HAGADI TP     |
| Asterias-1           | PAPPSQIOPS | TAAP        | ITT        | TKMAP      | LTE-DRRTK  | DVVVDY S      |
| Pisaster-1           | PAASQOTI   | QASS        | AAP        | TKMAP      | LTE-DRRTK  | EVVVDY S      |
| Acanthaster-1        | PSTSQSQTA  |             | AAP        | PRITI      | TPD-ERRAN  | EIVVDE I      |
| Patiria-1            | PATPOSQIA  |             | AAP        | QRITS      | TSD-DRRAN  | EIVVDP P      |
| Ophiothrix-1         | WPLITI     | L           | ATI        | TQSPE      | PLPNEQ     | EG GYLIDEIQMK |
| Lytechinus-2         | RIPEVPS    | ESAI        | SEI        |            | P          | SG DRTEDSTVRI |
| Hemicentrotus-2      | RIPEVPP    | ESAI        | SEN        |            | P          | SE EITEDSTLRI |
| Strongylocentrotus-2 | RIPEVPP    | ESAI        | SEN        |            | P          | SE EITEDSTLRI |
| Apostichopus-2       | HVTPTLALAS | LV          | TSLM-TK    | SPTPPSSEPS | SSSSSSSSSR | N-EDKFPMT     |
| Holothuria-2         | RVILEPIRPA | VISL        | SPLN-PR    | SOEPSGVQPO | ESPEEVHQN  | S-RDNYPMG     |
| Asterias-2           | WPVAIE     | S           | RDP        | PL-SP      | VAPGRVREDK | SADVDMYNP     |
| Pisaster-2           | WPV-VE     | S           | RDV        | SL-SP      | VAPGRVREDK | SADVDMYNP     |
| Acanthaster-2        | WPVVED     | R           | DDP        | ML-AP      | VAPGRVRODK | SADADLLLRP    |
| Patiria-2            | WPVVED     | R           | DDP        | MLIAP      | VAPGRVRODK | SADADLLLM     |
| Ophiothrix-2         | LOEGQVKFTS | RNLD        | FVNEAN-NV  | VEEPSVRVPO | QVE-EN     | KIVEETVPYV    |
| Amphiura             | LPEGQIRIQL | RHWFLLHEKEK | ESANEEN-NT | VEELPPPPPP | R          | SE ERDEEQVPDV |
| Ophioderma           | LPEGQIRGPE | RHEFLHEKER  | ETIIDQN-NR | VEPPPLV-AE | E          | AI VEEETVPVI  |
| Saccoglossus         | LPEGVVA    | DDSL        | KRF        |            | L          | SO SFGNDFKDTA |
| Ptychodera           | WPKDIDP    | AKKI        | EGF        |            | K          | EG TWEEDY     |
| Schizocardium        | WPKDMDP    | ALRE        | AGF        |            | K          | YG SWEDEDY    |

181

|                      |            |            |               |            |               |        |           |      |
|----------------------|------------|------------|---------------|------------|---------------|--------|-----------|------|
| Anneissia            | RK         | KPKGSS     |               |            | E INSE        | Q SA   | SNTE      |      |
| Oligometra           | SGR        | KNKDDP     |               |            | D TSE         | E SA   | SNKD      |      |
| Antedon              | SGK        |            |               |            |               | SE     | KNRD      |      |
| Florometra           | DGR        | KSKGGS     |               |            | D MSD         | D SA   | SNRD      |      |
| Lytechinus-1         | EGRPO      | DG PS      |               | OL         | D             |        |           |      |
| Hemicentrotus-1      | OGRPO      | DG PS      |               | OL         | D             |        |           |      |
| Strongylocentrotus-1 | EGRPO      | DG PS      |               | OL         | D             |        |           |      |
| Apostichopus-1       | AAA GGGSG  | QGNRGRKKGK |               | RHGK       | G NRRE        | Q DQ   | TV        |      |
| Holothuria-1         | DGE TPR-Q  | SNNGRNRGNP |               | RHSE       | D N           | P ED   | NI        |      |
| Asterias-1           | DQL AIEG   | SQMSRVGVL  | THDI          |            | VI NRSKI-TTES | NE     | GSYDNE    |      |
| Pisaster-1           | DQL VIEG   | SQMSRVDGAL | TQDI          |            | VI NRSKSATTES | NE     | GSYDNE    |      |
| Acanthaster-1        | GQT GNIN   | SQMLRGGNAM | GAGS          |            | RA NGTKAPTEV  | VD     | GRSDDD    |      |
| Patiria-1            | SGH TGDI   | APRGESAKAP | GPSG          |            | AA NATKIPVAEV | DE     | GMSVDE    |      |
| Ophiothrix-1         | HIT RQIE   | D NS       |               | V          | D LLSE        | G SD   | LR        |      |
| Lytechinus-2         | NDQSTERRID | DI DD      | AT NLEVPSPDAD | APDA       | T ATSDVERPLP  | EE     | TTAV      |      |
| Hemicentrotus-2      | DGDSTEIRID | NINP       | AT NLEVPSPEAN | APDA       | T ATSDVEQSR   | DN     | TTAV      |      |
| Strongylocentrotus-2 | DGESTEIRID | TNP        | AT NLEVPSPDAN | TPDA       | T ATSDVEQPRS  | DN     | TTAV      |      |
| Apostichopus-2       | DNA LGEDY  | EGPTNEGPL  | TSGEPTPTEN    | RIS        | N GPRG        | P SS   | NASS      |      |
| Holothuria-2         | DNV VREDY  | EPPTINGGAL | TSGQPTPTEN    | RIS        | S GLRE        | H SN   | T-SI      |      |
| Asterias-2           | DVV DVEEA  | NS         |               | VI         | Q R           | E ED   | LI        |      |
| Pisaster-2           | NAA DVEEA  | NS         |               | VI         | Q R           | E ED   | LI        |      |
| Acanthaster-2        | DIA EISE   | DK SS      |               | LI         | R QAAE        | K DE   | PI        |      |
| Patiria-2            | QEA AAGEQ  | FAEE NS    |               | LI         | R Q           | E EE   | LI        |      |
| Ophiothrix-2         | SQA IVGET  | ISD        | G FDWSDVSEI   | HNILNGGGDM | YINDQPRDDP    | S      | ENDE      |      |
| Amphiura             | SQD IIE    | S D        | HDWEDSIESE    | TLINEAIVM  | L-ADAPLIEQ    |        | NTEE      |      |
| Ophioderma           | NOE LVD-T  | ISD        | Q IDLEDSESE   | TNLLNDALLM | L-SDQVRENS    |        | EORIGTEEE |      |
| Saccoglossus         | NEDKLEI-VI | VVRP       | SH            |            | DE            | M DGTE | TRI ED    | NEHV |
| Ptychodera           | HRKYHP-ES  | VEQP       | NA            | NPEEPTPEPT | TIDL          | D KSL  | SES RD    | NVDI |
| Schizocardium        | YRKYHP-EE  | FTQP       | DL            | TIWIASTDSA | NHDE          | H FTTA | TPS E     |      |

Figure S1-continued.





361

|                      |     |            |             |            |            |            |            |       |            |            |
|----------------------|-----|------------|-------------|------------|------------|------------|------------|-------|------------|------------|
| Anneissia            | --- | KKN        | ---         | ---        | ---        | KPT        | ---        | ---   | RRPKRWDS   | ET         |
| Oligometra           | --- | NKN        | ---         | ---        | ---        | KPT        | ---        | ---   | RRPKRWDS   | ET         |
| Antedon              | --- | KKN        | ---         | ---        | ---        | KPT        | ---        | ---   | RRPKRWDS   | ET         |
| Florometra           | --- | KKN        | ---         | ---        | ---        | KPT        | ---        | ---   | RRPKRWDS   | ET         |
| Lytechinus-1         | --- | A-RREER    | RRNRE-RSSG  | GKSRSGRRKN | K          | D          | ND         | RS    | SRAKRQGLTL |            |
| Hemicentrotus-1      | --- | A-RREER    | RRNRE-RSSG  | GRSRSGRRKD | K          | D          | ND         | RA    | SRAKRHGLNM |            |
| Strongylocentrotus-1 | --- | A-RREER    | RRNRE-RSSG  | GRSRSGRRKD | K          | D          | ND         | RA    | SRAKRHGLNL |            |
| Apostichopus-1       | --- | EVSSTDGL   | -SREKSGSG   | GGRNRG-N   |            |            |            |       | GKGGKGSQR  |            |
| Holothuria-1         | --- | AATATEGA   | -DRSSGSRGG  | RGSNHQ-TGR | G          | S          | DRGSSRSNG  |       | GKGGKGNRQD |            |
| Asterias-1           | --- | SSSSRREK   | RRRRO       |            | RH         | RERELREQRK | QSN        | SKRKS | KDGKDHVS   |            |
| Pisaster-1           | --- | SSSSRREAK  | RRRRO       |            | RH         | RERELREQRK | QSN        | SKRKT | KDGKDHSA   |            |
| Acanthaster-1        | --- | LSSEKREDA  | TRKLR       |            | RK         | EQLSRKQP   | HS         | NKRKS | KLE-KKGSE  |            |
| Patiria-1            | --- | LSIERKKDDA | TRRRR       |            | K          | EQLLRKQOO  | SNS        | SKRRT | KLE-KKGSE  |            |
| Ophiothrix-1         | --- | ---        | ---         | ---        | ---        | ---        | ---        | ---   | ---        | ---        |
| Lytechinus-2         | --- | KKRLESA    | ERNR        | GTDHMLSE   | DSTLLAREPL | GID        | VR         |       | KRFH       |            |
| Hemicentrotus-2      | --- | KKRLESA    | ERNR        | GTDHMLSE   | DSTLLAREPL | GID        | VR         |       | KRFH       |            |
| Strongylocentrotus-2 | --- | KKRLESA    | ERNR        | GTDHMLSE   | DSTLLAREPL | GID        | VR         |       | KRFH       |            |
| Apostichopus-2       | --- | EEPAAGLNPT | EQOEDGGGGG  | GGGGGGGGG  | G          | EPR        | NNSNSDQPRN |       | NRGKVNESQR |            |
| Holothuria-2         | --- | RGORINIK   | -KOKSGERGS  | ANPNPTRGGD | R          | EPT        | D          | NEQSR | NRGKVNESQR |            |
| Asterias-2           | --- | G-KSEGK    | NKRRSGSREG  | GRSSRRSRGK | S          | S          | RS         | KK    | QRDGRERSKR |            |
| Pisaster-2           | --- | G-KSEGK    | NKRRSGSREG  | GRSSRRSRGK | S          | S          | RS         | KK    | QRDGRERSKR |            |
| Acanthaster-2        | --- | G-KSEGK    | SKRKS       | GRSFRR-RGK | N          | S          | RR         | KK    | GRDGRERSKR |            |
| Patiria-2            | --- | G-KSEGK    | SRKKS       | DRSSRR-RGK | S          | S          | RR         | KK    | GRDGRERSKR |            |
| Ophiothrix-2         | --- | K-PKKNKNKH | DRRRKGRHG   | GD         | RD         | DST        | OPT        |       |            |            |
| Amphiura             | --- | K-SKNK     | K           | NRRRKN     | R          | HG         | ED         | DFI   | OPT        |            |
| Ophioderma           | --- | K-PKHK     | K           | NRRRKP     | K          | HE         | QD         | DYT   | OPT        |            |
| Saccoglossus         | --- | GTRKTKL    | RHVVKVSKST  | PI-QOI     | E          | TTTTM      | KPF        | FDV   | D-ID       | IIFYRFVNKT |
| Ptychodera           | --- | KSRAKSK    | NSTKVKPT    | -YVSSMTSD  |            | EETLT      | RPO        | GDE   | ARRET      | DATRKIEDSS |
| Schizocardium        | --- | KSRTKKG    | NNTKSKSIIIG | KLVENM     |            |            |            | E     | TESPT      | NWQRDGTDER |

421

|                      |     |            |            |             |            |            |            |            |            |          |
|----------------------|-----|------------|------------|-------------|------------|------------|------------|------------|------------|----------|
| Anneissia            | --- | TTLSDFLFSQ | RFLQRAYDS  | ID          | VDEI       | TTEFGVPEE  | DISSSLSEEE | LSSNQVKSDD |            |          |
| Oligometra           | --- | TTLSEF     | ---        | LQDIYNSD    | FADLSNIDKI | KTFGDTIPEG | DPSSSVSQEE | SSSNEVIPDA |            |          |
| Antedon              | --- | STLSDFLLSQ | KLLQEIYDS  | IDDRS       | IDDI       | ITQFDALPED | DLSSSLSQEE | SSSNEVIOEA |            |          |
| Florometra           | --- | TTLSDFLLSQ | RFLQGVYDS  | IGDQSTLDEL  |            | APRFDAVQEG | DTSYSLSQE  | SSSNEVISEA |            |          |
| Lytechinus-1         | --- | WRN        | MFSQ       | KALSN       |            |            |            |            |            |          |
| Hemicentrotus-1      | --- | WRN        | MFSQ       | KGFNS       |            |            |            |            |            |          |
| Strongylocentrotus-1 | --- | WRN        | MFSQ       | KEFSD       |            |            |            |            |            |          |
| Apostichopus-1       | --- | REQSEELTVE |            | TTTG        | CASQDQGN   |            | CEESNAN    | AGGAS      |            |          |
| Holothuria-1         | --- | RNQIDEDAER | NISSE      | NGHG        | SRQGGGG    |            | EGEERN     | NGGSSQGGT  | SNSNIGIGNS |          |
| Asterias-1           | --- | AATTP LAVQ |            |             |            |            | E-RPLK     | NGGRNSTSGE | HS         | SVN      |
| Pisaster-1           | --- | AVTTP LAVQ |            |             |            |            | EP IHPLK   | NGGRNSTSGE | LS         | SVN      |
| Acanthaster-1        | --- | SVTTP VAVQ |            |             |            |            | TADHPFK    | HGAYNSTIGD | LS         | LVN      |
| Patiria-1            | --- | VITPV AIE  |            |             |            |            | TAEHPFK    | NGGYNSTSGD | LS         | PVN      |
| Ophiothrix-1         | --- | ---        | ---        | ---         | ---        | ---        | ---        | ---        | ---        | ---      |
| Lytechinus-2         | --- | HT         | P          | RSSRE       |            | QAST       | ATHSD      | DD         | PAT        | SRQE     |
| Hemicentrotus-2      | --- | HT         | P          | RSSRE       |            | QAST       | ATHALD     | DD         | SAT        | SRQE     |
| Strongylocentrotus-2 | --- | HT         | P          | RSSRE       |            | QAST       | ATHALD     | DD         | PAT        | SRQE     |
| Apostichopus-2       | --- | HPN        |            |             |            |            |            |            |            |          |
| Holothuria-2         | --- | PAE        |            |             |            |            |            |            |            |          |
| Asterias-2           | --- | WEG        | LDTS       | HPVKEPTARS  | V          | I GR       |            | VDTRPFRNFL |            | YNRYTVDE |
| Pisaster-2           | --- | WEG        | LDTS       | HPEKEPAARS  | V          | FGG        |            | IDTRPFRNFL |            | YNRYTVDE |
| Acanthaster-2        | --- | WEA        | LVTS       | HPPTKD IVDA | LR         | SALRA      |            | AGRSPSRVA  |            | GSFAPDE  |
| Patiria-2            | --- | WEG        | LVTS       | HPPTKEIVDA  | LR         | SALRA      |            | AGRTPSLFAP |            | ANNFLLE  |
| Ophiothrix-2         | --- | DEFITDIEVP | HPRIQAVAGM | PSSRSEPA    |            |            | NIDDPD     | PGTRSERSFV |            |          |
| Amphiura             | --- | DELITDIEVM | HPQARVVSRS | EPVH        |            |            | AVDDPD     | PGSRERSFV  |            |          |
| Ophioderma           | --- | DQLITDIEVL | HPQOVVNAE  | SPSRSEAG    |            |            | NLDEAD     | AGRSERSFV  |            |          |
| Saccoglossus         | --- | WRVIEE     | P          | EIMV        |            | G GK       |            | SESSRE     | SDIDSSI    |          |
| Ptychodera           | --- | WWMVDN     | R          | EFEY        |            | EGR        |            | DRHNKS     | KTRK       | GGNAT    |
| Schizocardium        | --- | WWTIVED    | P          | HFQI        |            | GET        |            | DENSSN     | DKKINGNGT  |          |

Figure S1-continued.

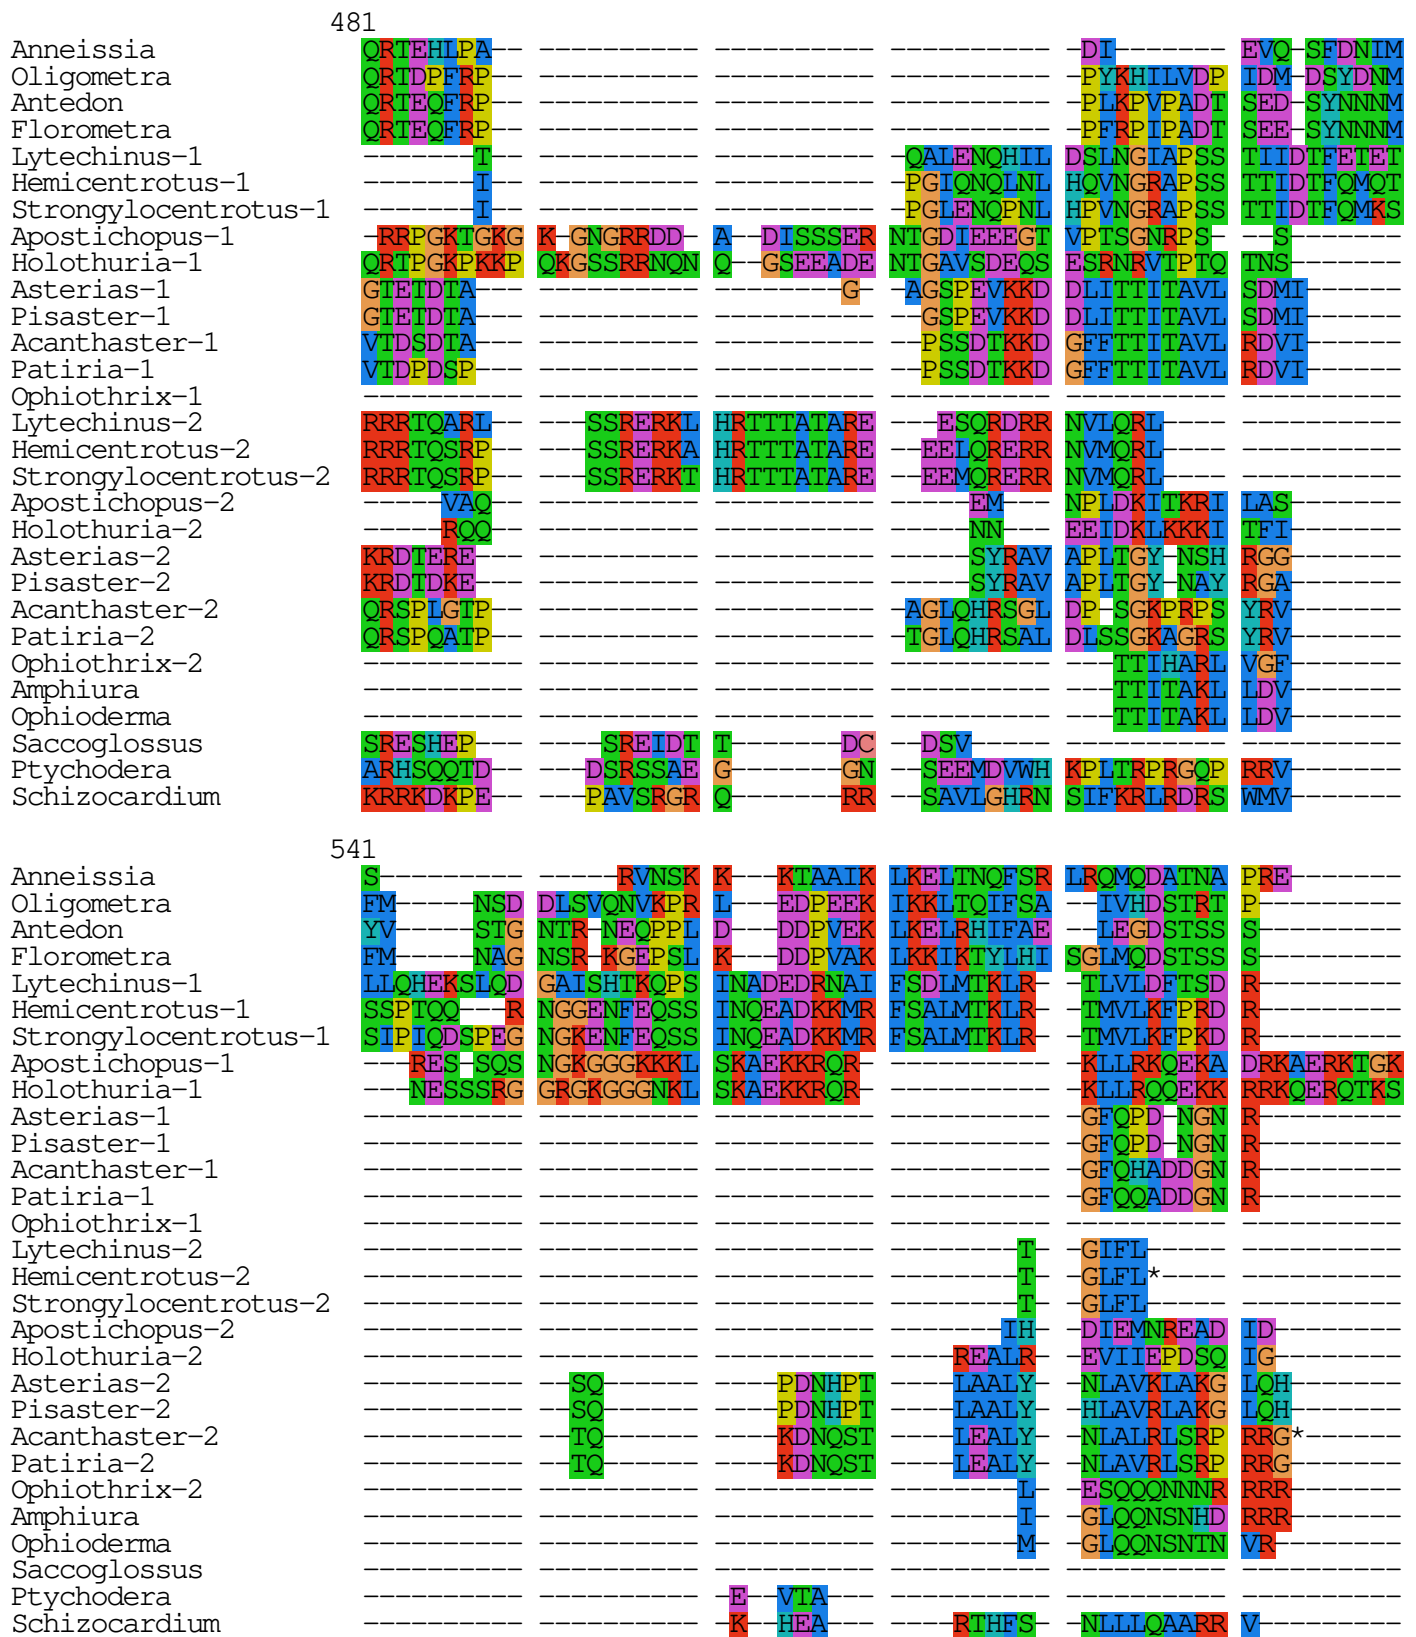

Figure S1-continued.

601

|                      |            |            |            |            |            |            |
|----------------------|------------|------------|------------|------------|------------|------------|
| Anneissia            | -----      | -----      | -----      | -----      | -----      | -----      |
| Oligometra           | -----      | -----      | -----      | -----      | -----      | -----      |
| Antedon              | -----      | -----      | -----      | -----      | -----      | -----      |
| Florometra           | -----      | -----      | -----      | -----      | -----      | -----      |
| Lytechinus-1         | -----      | -----      | -----      | -----      | -----      | -----      |
| Hemicentrotus-1      | -----      | -----      | -----      | -----      | -----      | -----      |
| Strongylocentrotus-1 | -----      | -----      | -----      | -----      | -----      | -----      |
| Apostichopus-1       | SKKSKSKNKN | ROTKGDRERR | ITVRWNSNDE | RSRROVPRDS | FSSVNGKYNS | GHPYRRVYSM |
| Holothuria-1         | SKK---GKKG | SRTQGERERR | ITVRWNDGEE | RSRRHVPREQ | FSPNNPRTTY | HTDSR-TSLF |
| Asterias-1           | -----      | -----      | -----      | -----      | -----      | -----      |
| Pisaster-1           | -----      | -----      | -----      | -----      | -----      | -----      |
| Acanthaster-1        | -----      | -----      | -----      | -----      | -----      | -----      |
| Patiria-1            | -----      | -----      | -----      | -----      | -----      | -----      |
| Ophiothrix-1         | -----      | -----      | -----      | -----      | -----      | -----      |
| Lytechinus-2         | -----      | -----      | -----      | -----      | -----      | -----      |
| Hemicentrotus-2      | -----      | -----      | -----      | -----      | -----      | -----      |
| Strongylocentrotus-2 | -----      | -----      | -----      | -----      | -----      | -----      |
| Apostichopus-2       | -----      | -----      | -----      | -----      | -----      | -----      |
| Holothuria-2         | -----      | -----      | -----      | -----      | -----      | -----      |
| Asterias-2           | -----      | -----      | -----      | -----      | -----      | -----      |
| Pisaster-2           | -----      | -----      | -----      | -----      | -----      | -----      |
| Acanthaster-2        | -----      | -----      | -----      | -----      | -----      | -----      |
| Patiria-2            | -----      | -----      | -----      | -----      | -----      | -----      |
| Ophiothrix-2         | -----      | -----      | -----      | -----      | -----      | -----      |
| Amphiura             | -----      | -----      | -----      | -----      | -----      | -----      |
| Ophioderma           | -----      | -----      | -----      | -----      | -----      | -----      |
| Saccoglossus         | -----      | -----      | -----      | -----      | -----      | -----      |
| Ptychodera           | -----      | -----      | -----      | -----      | -----      | -----      |
| Schizocardium        | -----      | -----      | -----      | -----      | -----      | -----      |

661

|                      |            |            |            |          |
|----------------------|------------|------------|------------|----------|
| Anneissia            | -----      | -----      | -----      | -----    |
| Oligometra           | -----      | -----      | -----      | -----    |
| Antedon              | -----      | -----      | -----      | -----    |
| Florometra           | -----      | -----      | -----      | -----    |
| Lytechinus-1         | -----      | -----      | -----      | -----    |
| Hemicentrotus-1      | -----      | -----      | -----      | -----    |
| Strongylocentrotus-1 | -----      | -----      | -----      | -----    |
| Apostichopus-1       | DPRRTAA-H  | FRSKPKSVRO | IRRRPSSSSP | RKVEIKAR |
| Holothuria-1         | DQTRTSKIDQ | HRGKHKMSR  | NGKQLSRTRS | KSSLLKPR |
| Asterias-1           | -----      | -----      | -----      | -----    |
| Pisaster-1           | -----      | -----      | -----      | -----    |
| Acanthaster-1        | -----      | -----      | -----      | -----    |
| Patiria-1            | -----      | -----      | -----      | -----    |
| Ophiothrix-1         | -----      | -----      | -----      | -----    |
| Lytechinus-2         | -----      | -----      | -----      | -----    |
| Hemicentrotus-2      | -----      | -----      | -----      | -----    |
| Strongylocentrotus-2 | -----      | -----      | -----      | -----    |
| Apostichopus-2       | -----      | -----      | -----      | -----    |
| Holothuria-2         | -----      | -----      | -----      | -----    |
| Asterias-2           | -----      | -----      | -----      | -----    |
| Pisaster-2           | -----      | -----      | -----      | -----    |
| Acanthaster-2        | -----      | -----      | -----      | -----    |
| Patiria-2            | -----      | -----      | -----      | -----    |
| Ophiothrix-2         | -----      | -----      | -----      | -----    |
| Amphiura             | -----      | -----      | -----      | -----    |
| Ophioderma           | -----      | -----      | -----      | -----    |
| Saccoglossus         | -----      | -----      | -----      | -----    |
| Ptychodera           | -----      | -----      | -----      | -----    |
| Schizocardium        | -----      | -----      | -----      | -----    |

Figure S1-continued.

# IGF

0.2

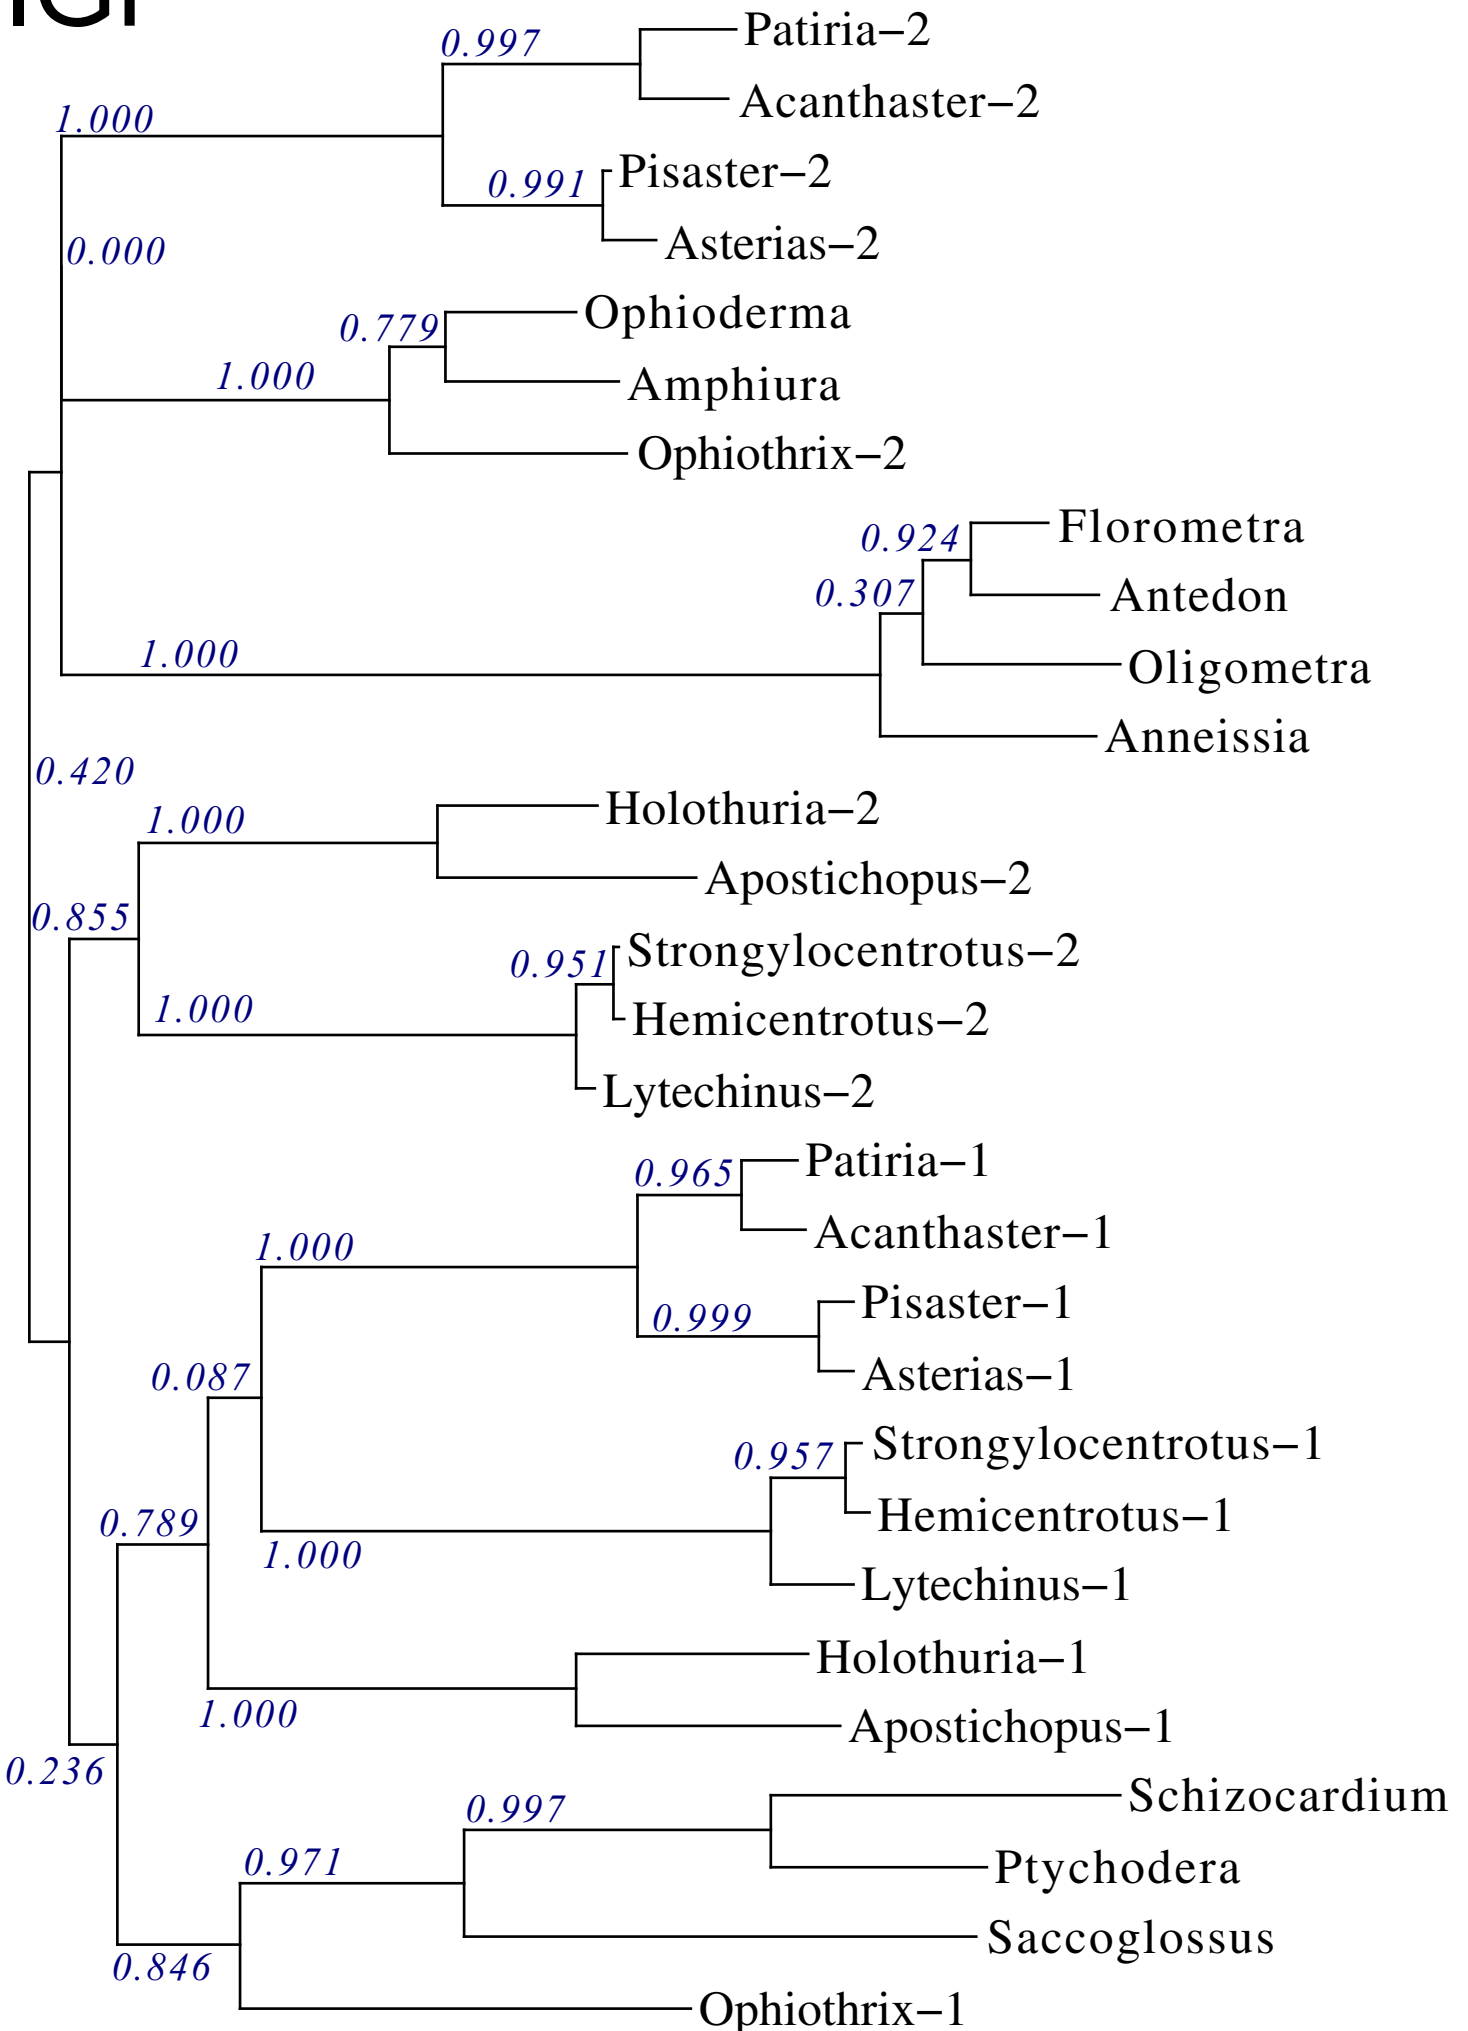

Figure S2. Sequence similarity tree of ambulacrarian IGFs.

```

Lytechinus      --QHLTRVRLCGLEFARAVYNHCSRASKRSDPGTISDIPLADRYLAR
Hemicentrotus  --QQGPRNRYCGLEFARAVFSQSMANKRSDPGAVAESASAARYLAR
Strongylocentrotus --QQGPRNRYCGLEFARAVFTQSMANKRSDPGAVAESASAARYLAR
Apostichopus-1  -----IRLCGPDLSRAVYQICSHG-KRGYIPTFNS--E-----
Holothuria-1    -----VRLCGADLSRAVYRVCSHG-KRGYPMADL----E-----
Apostichopus-2  ----WSHQRLCGPDLVHALSLVGERG---YFGGSRLVER---D-VQ
Holothuria-2    -----HKLCGPALVDALAVVCRGRG---YGGTVSRTK---REAS
Asterias-1      -----AEKYCDEFHMAVYRTTEH-KRS-GRSAFSL--N-----
Pisaster-1      -----AEKYCDEFHMAVYRTCAEH-KRS-GRSTYSL--N-----
Acanthaster1    -----EKFCDNDFHLAVYQTSTH-KRGDGEPVLSL--K-----
Patiria-1       -----EKYCDDDFHMAVVRTCAVS-KRS--QPGMSL--S-----
Asterias-2      RSDHASVKHFCGLEFSYAVVTAGEA-KRS-IRSAFFF-----
Pisaster-2      SNDHGRVKQYCGLEFSYAVVTACAEA-KRS-IRSAFFY-----
Acanthaster-2   ---DSSSKHCGSAFPQFVWTASMA-KRS-NRSPRSL--D-----
Patiria-2       ---TETNRHCGAAFPDEFVLAACSMA-KRS-IRSSPSL--H-----
Ophiothrix-1   --DSARYQPLCGREFTRAVMEICATQVKRTEPLFQRFYNAN-----
Ophiothrix-2   ---QDSYKSCGREFTRRVMEVCATHVKRTEHF-----
Amphiura        ----DSAKYCGLAFSRAVMEICARQVKRTAPLWERLYTAS-----
Ophioderma     ----DSATYCGVAFSMAVYETCSMQVKRTDPVRQRLYSAA-----

Lytechinus      DTGYGQVQDTPFEWYDVAGQAEERLRP-----SL---SDIIFA
Hemicentrotus  DTGYEQAEDMPLEWYDIARQGAERLRP-----SL---TDIIFS
Strongylocentrotus DTGYEQAEDMPLEWYDVARQGAERLRP-----SL---TDIIFS
Apostichopus-1 DDQLNQEFGTDL-----EEYLAETIKEYLKPNLSLYDDVERELYPSLP
Holothuria-1   EEDFSQELDTEV-----DEFLAQALTGFLASRSFAADMESDRYITLP
Apostichopus-2 DDGLDEEITTLV-----VGAERT-----SILECLK--AWSFPF
Holothuria-2   QDKLDV-----HA--GGSMTH
Asterias-1     D--F-----FRS-NSKRTAGSPRP--DDDFFL
Pisaster-1     D--LLSMD-----SFRS-SPKRKAGSPLR--DDNSFL
Acanthaster1   D--VLTGS-----RLRG-NIKRSFGSTLE--DEAFFA
Patiria-1      D--VLTMN-----RFRGHNIKRSIDSTLE--DNAFFM
Asterias-2     D--MFPVF-----KSPE-----RIPAD--FDDSSM
Pisaster-2     D--MFPVF-----KSQE-----RIPAD--FDDSSM
Acanthaster-2 D--LLETf-----KSAR-----HLDIS--Y--RTP
Patiria-2      D--LLQAF-----KSDE-----YQANR--Y--TSP
Ophiothrix-1   ---LVKRSIDPAFWNNLLEANP-----DLMD-
Ophiothrix-2   ---MVKRSIDDEFWNDLMESGL-----GL-
Amphiura       ---RVKRFSDFEFWNAVLESDS-----DISM-
Ophioderma     ---RVRRFADPDFWEAVFNDS-----NNVM-

Lytechinus      PRYRRSLFARPNTPMGRHCCVTGCTSQELASVC-----
Hemicentrotus  SFRRSIQNRRLQPMGQLCCVYGCTLVELASVC-----
Strongylocentrotus SFRRSIHNRGQLPMGQLCCVYGCTLVELASVC-----
Apostichopus-1  RG---FRRVTRTGGIARRCCSTGSSSDIAKLC-----
Holothuria-1    QR---FRRNA-RGGGIARRCCASGSSSDIAKLC-----
Apostichopus-2  -----RRRTRGIVEECCFRRCTWENLESYCSKTTAYKKADNMI
Holothuria-2    -----VRFTRGIVEDCCFKGCTWSYLENYCLLS-----
Asterias-1      TM---QKRPETYVGMGSYCCLVGCTRDQLSQVC-----
Pisaster-1      AL---QKRTETYVGMGSFCCLVGCTTEQLSQVC-----
Acanthaster1    SR---LVKRSEYDGIASYCCIHGCTPSELAVC-----
Patiria-1       SG---LEKRSEYTGIASYCCLHGCTPSELSVVC-----
Asterias-2      IH---VRKRQDYQGMATYCCTNGCTISQLTSNGIC-----
Pisaster-2      IH---VRKRQDYQGMATYCCTNGCTISQLTSNGIC-----
Acanthaster-2   IR---LSKRQDYDGMADYCCIIGCTNELIASGIC-----
Patiria-2       IH---LRKREEYMTIADYCCSVGCTSPDLVASGIC-----
Ophiothrix-1    ---KRQSSAGVMATHCCQSGCTSQEISMVC-----
Ophiothrix-2    ---DKR--SETGMAEHCCQNGCTDQEISMVC-----
Amphiura        ---DKRQPAGVGMATYCCNHGCTDTELSLVC-----
Ophioderma     ---DKRQTAMGMAQYCCSHGCTPQELSLVC-----

```

Figure S3. Sequence alignment of ambulacrarian GSSs.

# GSS

0.5

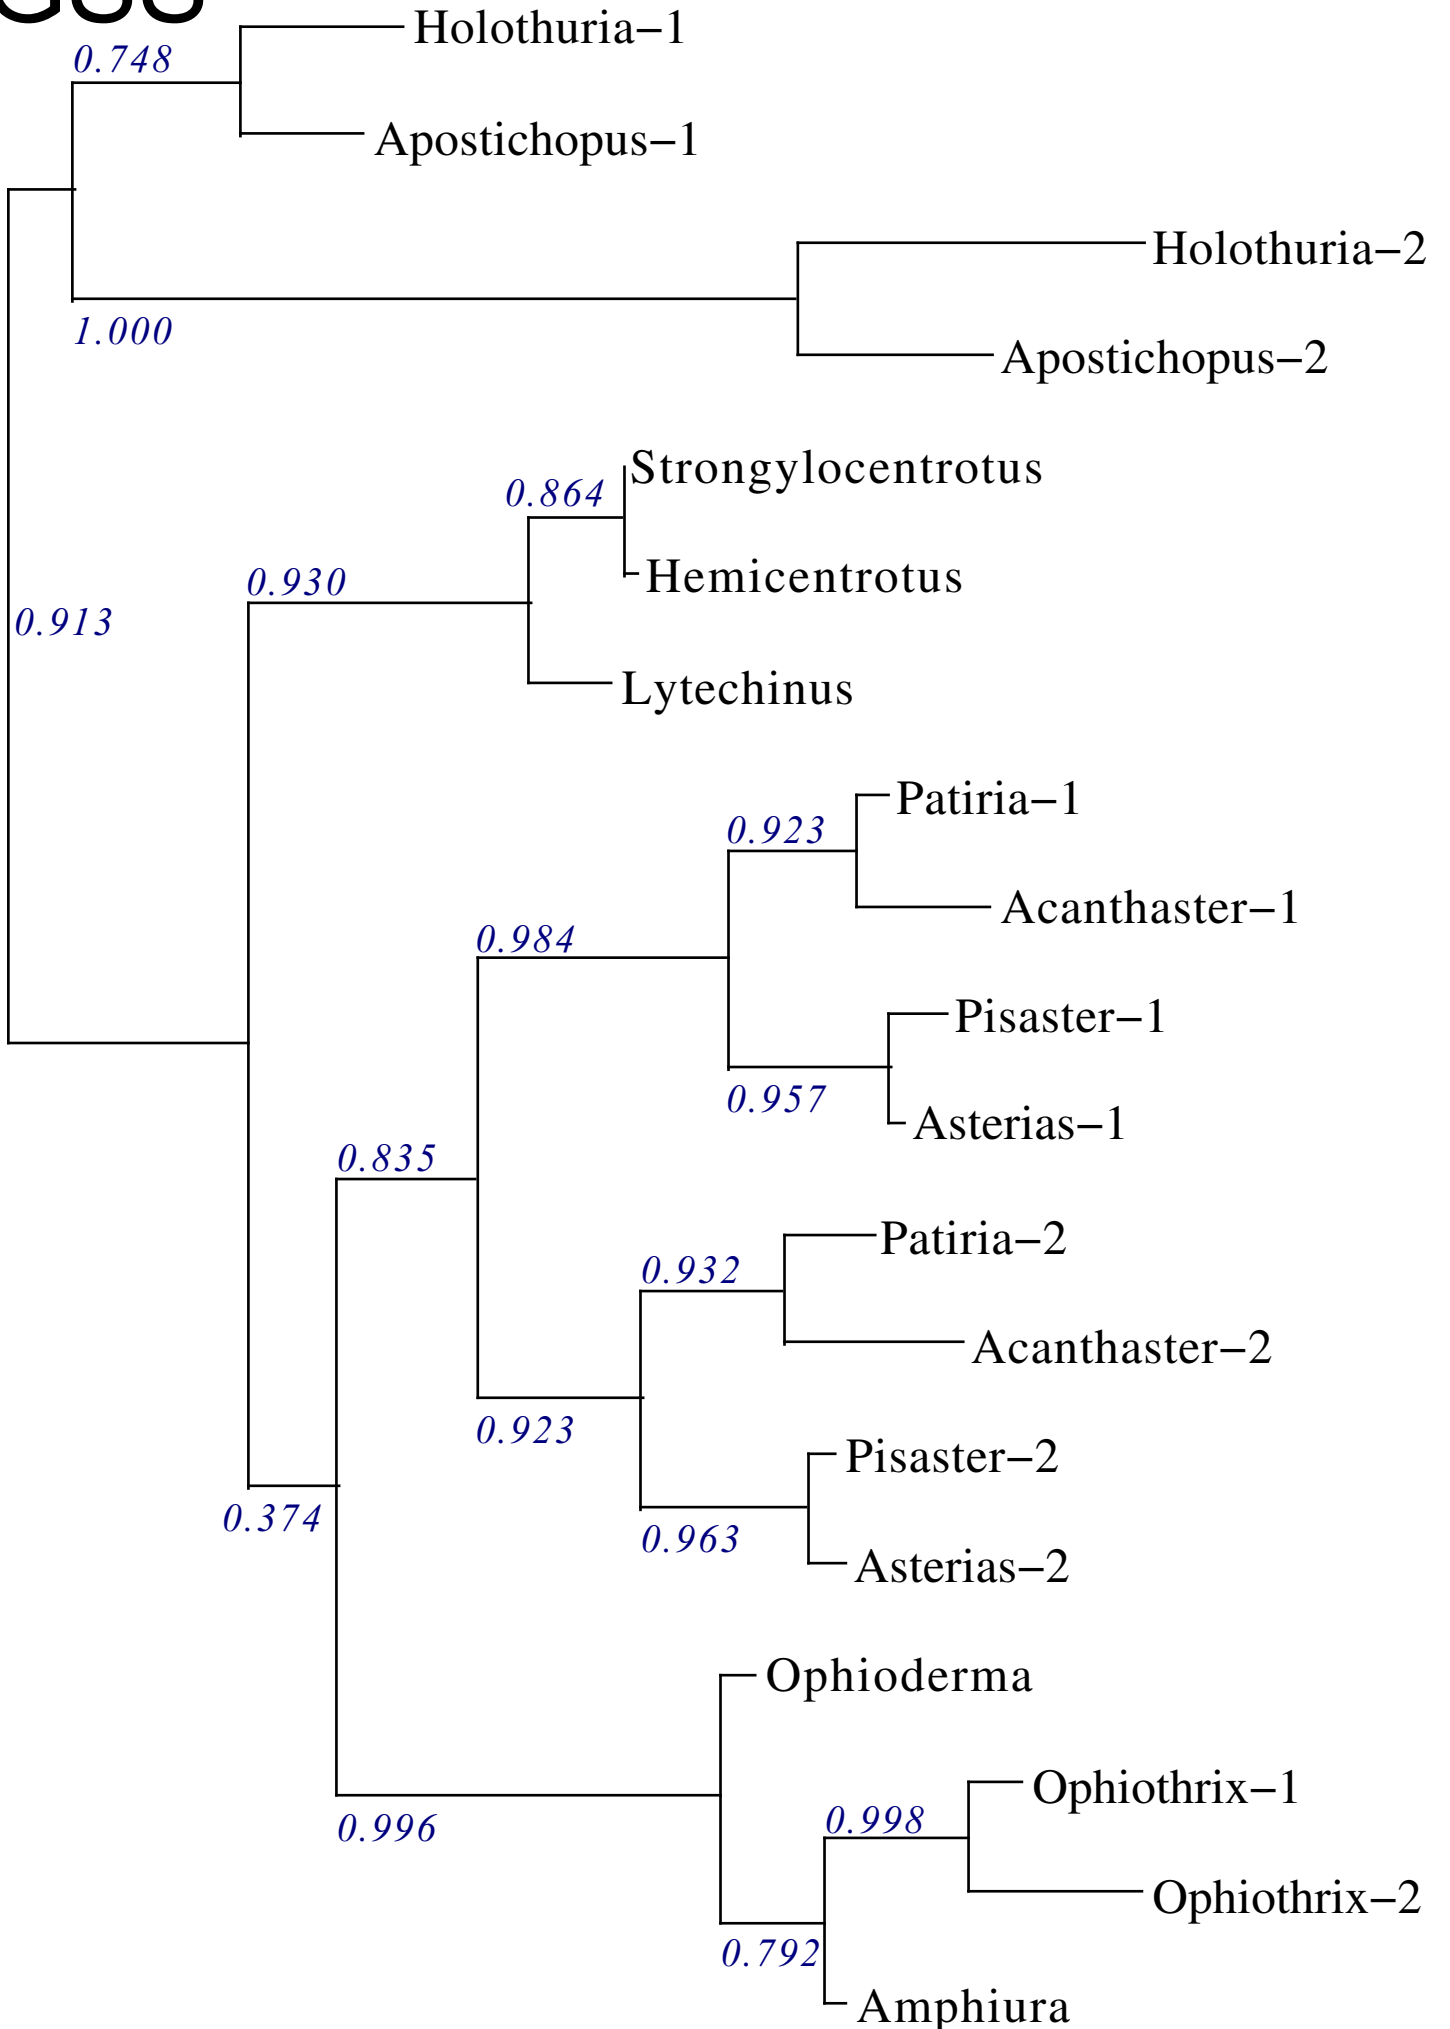

Figure S4. Phylogenetic tree of ambulacrarian GSSs.

Drosophila -----LQHTTEGLEMLFRERSQSDWENVVHQETHS-R--C-RDKLIVRQLYWA  
 Periplaneta -----TKTENELEEMFKARSEEDWENAWHREHRT-R--C-QETLLRHLIYWA  
 Stegodyphus -----EVDVDPAWENIFKARSDWDWRSVWHTERHR-R--C-YHDLVHMDWV  
 Oligometra -----QDYSHRSRQEWARVWTVESMR-Q--C-HEDLREMVHIS  
 Anneissia -----LRDYSRSHNDWARVWTVESMR-Q--C-HENLREMVHVS  
 Antedon -----LQDYSDRSHHDWARVWTVESMR-Q--C-HEDLREMVHIS  
 Florometra -----LQDYSDRSHYDWARVWTVESMR-Q--C-HEDLREMVHIS  
 Lytechinus -DNLNCNQVIPQETMDEYELRTPPEEWRENWLLDSLY-T--CVGPQLQRLGELA  
 Hemacentrotus TEKFCNCMVIPELTMEDYEDRTPPEEWRESWTMDTLR-T--CVGPQLQRVGELA  
 Strongylocentrotus -EKFCNCMVLPELTMEDYEDRTPPEEWRESWNMDTLR-T--CVGPQLQRVGELA  
 Apostichopus -----TLQELNSRTQPSWEQLWIVENV-PTVDCTV-DAVQLHIIA  
 Holothuria -----DTTGLPETTIETLNAWTASEWVIAWASGSLVPEGC-TTLSVQQLFEYA  
 Asterias -----AKPHLPVDQWRSRSKADWIRLWNTERHVNV--C-NEHLQPVFDDAA  
 Pisaster -----AKPHLPVDQWRSRSKADWIRLWNTERHVNV--C-NENLQPVFDDAA  
 Acanthaster -----APHLPVEQWNSRSKADWVKLWNTERHVNT--C-NEALLPVWDVA  
 Patiria -----AAPHLPVEQWKSRSKADWVKAWNTERHVDT--C-NEALLPVWDIA  
 Ophiothrix -----KITDYSSRTKADWQRLWLWLTESHQ-K--C-NEDLPLWKIA  
 Amphiuira -----RNTDYSSRTRADWQRLWVLTESHQ-K--C-NEDLIPLWKIA  
 Ophioderma -----KTTYDYSSRTTADWQRLWVLTESHQ-K--C-NEDLIPLWKIA  
 Saccoglossus-1 LTVENEETITFSELNTMYGTRTLTDWQGWKWTSETH-A--C-GSNLYRISEYV  
 Ptychodera -----AKDYDTVEDLILKYGTRTEDDWRNVWHTESHN-K--C-RNSLYSYVIFA  
 Schizocardium -----ENAYETVESLKAKYSGRTFNDWRAAWNTETHN-K--C-RNSLYSYVIFA

Drosophila CEKDIYRLTRRNKKRTGNDEAWIKKTTTEPDGSTWLHVNYANMFLRSRR----  
 Periplaneta CEKDIYRLSRRNDYQOKENL-FLDE---GEPYPELSVVEARVFLDRRRQR-  
 Stegodyphus CQKDIYAVRRKKRST-----DPEFLDDQKAHSFLGRRLKKS  
 Oligometra CRNDPRK-ITSKRN-----IEIPRSEATGFLSRFL----  
 Anneissia CRNDPRK-ISSKRS-----IEIPRNEATGFLSRFL----  
 Antedon CHNDPRK-ITSKRS-----IEIPRNEATGFLSRFL----  
 Florometra CHNDPRK-ITSKRS-----IEIPRNEATGFLSRFL----  
 Lytechinus CMNDPRKSVVVKRSN-----SGREIFLPAKLAKAFLHYRHRHD-  
 Hemacentrotus CINDPRKTIVVKRSN-----SDRDLELPAKLAKAFLQYRHRKD-  
 Strongylocentrotus CINDPRKTIVVKRSN-----SDRDLELPAKLAKAFLHYRHRKD-  
 Apostichopus CSNDVYKDEHGSRRRRF-----SDKRRRS--IEFLNFSEANNFLA-KTKRT-  
 Holothuria QONDFYDAEASTGL-----GSGTGRRRRQSSIEFLTHREASNFLHRSKRFR  
 Asterias QONDIRK-IT-KRT-----GEEFVKEWAAKDFLIGS----  
 Pisaster QYDVRK-IT-KRT-----GEEFVKEWAKDFLIGS----  
 Acanthaster QONDIRK-IT-KRM-----GREFLNEWTAKNFLAGS----  
 Patiria QONDIRK-IS-KRT-----DREEVKEWNAKNFLAGS----  
 Ophiothrix CTYDIRK-IN-KRA-----PEEVEDSEAKAFLIGP----  
 Amphiuira CTYDIRK-IT-KRS-----PEEIAEPDAKNFLLGP----  
 Ophioderma CTYDIRK-IN-KRS-----PEEVAEPEAKNFLLGP----  
 Saccoglossus-1 CYVDIHKSPDRKRTD-----DAFVDSAVAHDFLRLGLMEKRT  
 Ptychodera CMVDIYATGDKKRAE-----PPEVEHSIANSFLAGHRAEKR  
 Schizocardium CMKDIHASGDRKRGQ-----FPFLDHEVADKFLSGSL-GKR

Drosophila --SDGNTPSISNECCT-KAGCTWEEYAEY-CPSNKRNRNHY-----  
 Periplaneta --RRGPGSSITEECCHNTAGCTWEEYAEY-CPANKRLRKFV-----  
 Stegodyphus PHHTLVKRGIIIDECCHGSAGCSWEEYAEY-CPANSRMRS-----  
 Oligometra --RTRRPSELHEDCCLDSRGC TWEEVAEIA CINNRRAHRPGSPIGR----  
 Anneissia --RTRRPSELHEDCCLDSRGC TWEEVAEIA CINNRMRHRPGSPVGR----  
 Antedon --RTRRPSELHEDCCLDSRGC TWEEVAEIA CINNRMRHRPGSPVGR----  
 Florometra --RTRRPSELHEDCCLDSRGC TWEEVAEIA CINNRRIHRPGSPVGR----  
 Lytechinus --SRRRRVTGKDEECCLESNGCHLEELGEY-CTLHSRAYHVSQSQP----  
 Hemacentrotus --SRRRRVTGKDEECCAEAQGRWEEELGEY-CTLHTRAYHQSQGP----  
 Strongylocentrotus --SRRRRVTGKDEECCAEAQGRWEEELGEY-CTLHTRAYHQSQGP----  
 Apostichopus HSRVRRTTTTFSTECDD--KLCIWEEVGEY-CWH-SRVYH-----  
 Holothuria RGRTRRSTTISAECCG-TQEC KWEEIGEY-CVH-PREWHLP-----  
 Asterias ----KRRKRLNEECCHEDTGCWEEVAEY-CKKHGREKHKPGSTVAQKQGR-  
 Pisaster ----KRRKRLNEECCHEDTGCWEEVAEY-CKQHGREKHKPGSPMVPGMQGR-  
 Acanthaster ---KRRKRLNEECCHEDLGCWEEVAEY-CVMHGREKHEDGSPVRGKPGRRR  
 Patiria ---RRKRLNEECCHEDLGCWEEVAEY-CVMHGREKHEDGSPVRRRPGRRR  
 Ophiothrix ---RRHKRRLNEECCHESKGCWEEIGEY-CRMHSRASHVDSRIDSR----  
 Amphiuira ---IRHKRRLNEECCHESKGCWEEIGEY-CRMHSRASHVSGKVDAR----  
 Ophioderma ---RRHKRRLNEECCHESKGCWEEIGEY-CRMHSRASHIDGRVDSR----  
 Saccoglossus-1 L-RRYRRTSATSECCADDGCVWEEELAEY-CTHQREVRTMDE-----  
 Ptychodera M-TRFRRASPTEECCSNAHGCNWEEELAEY-CSHQRDDTRRR-----  
 Schizocardium M-ARFRRANPSEECASNRRNGCTWEEELAEY-CNHQRDDIDGR-----

# Dilp7

0.2

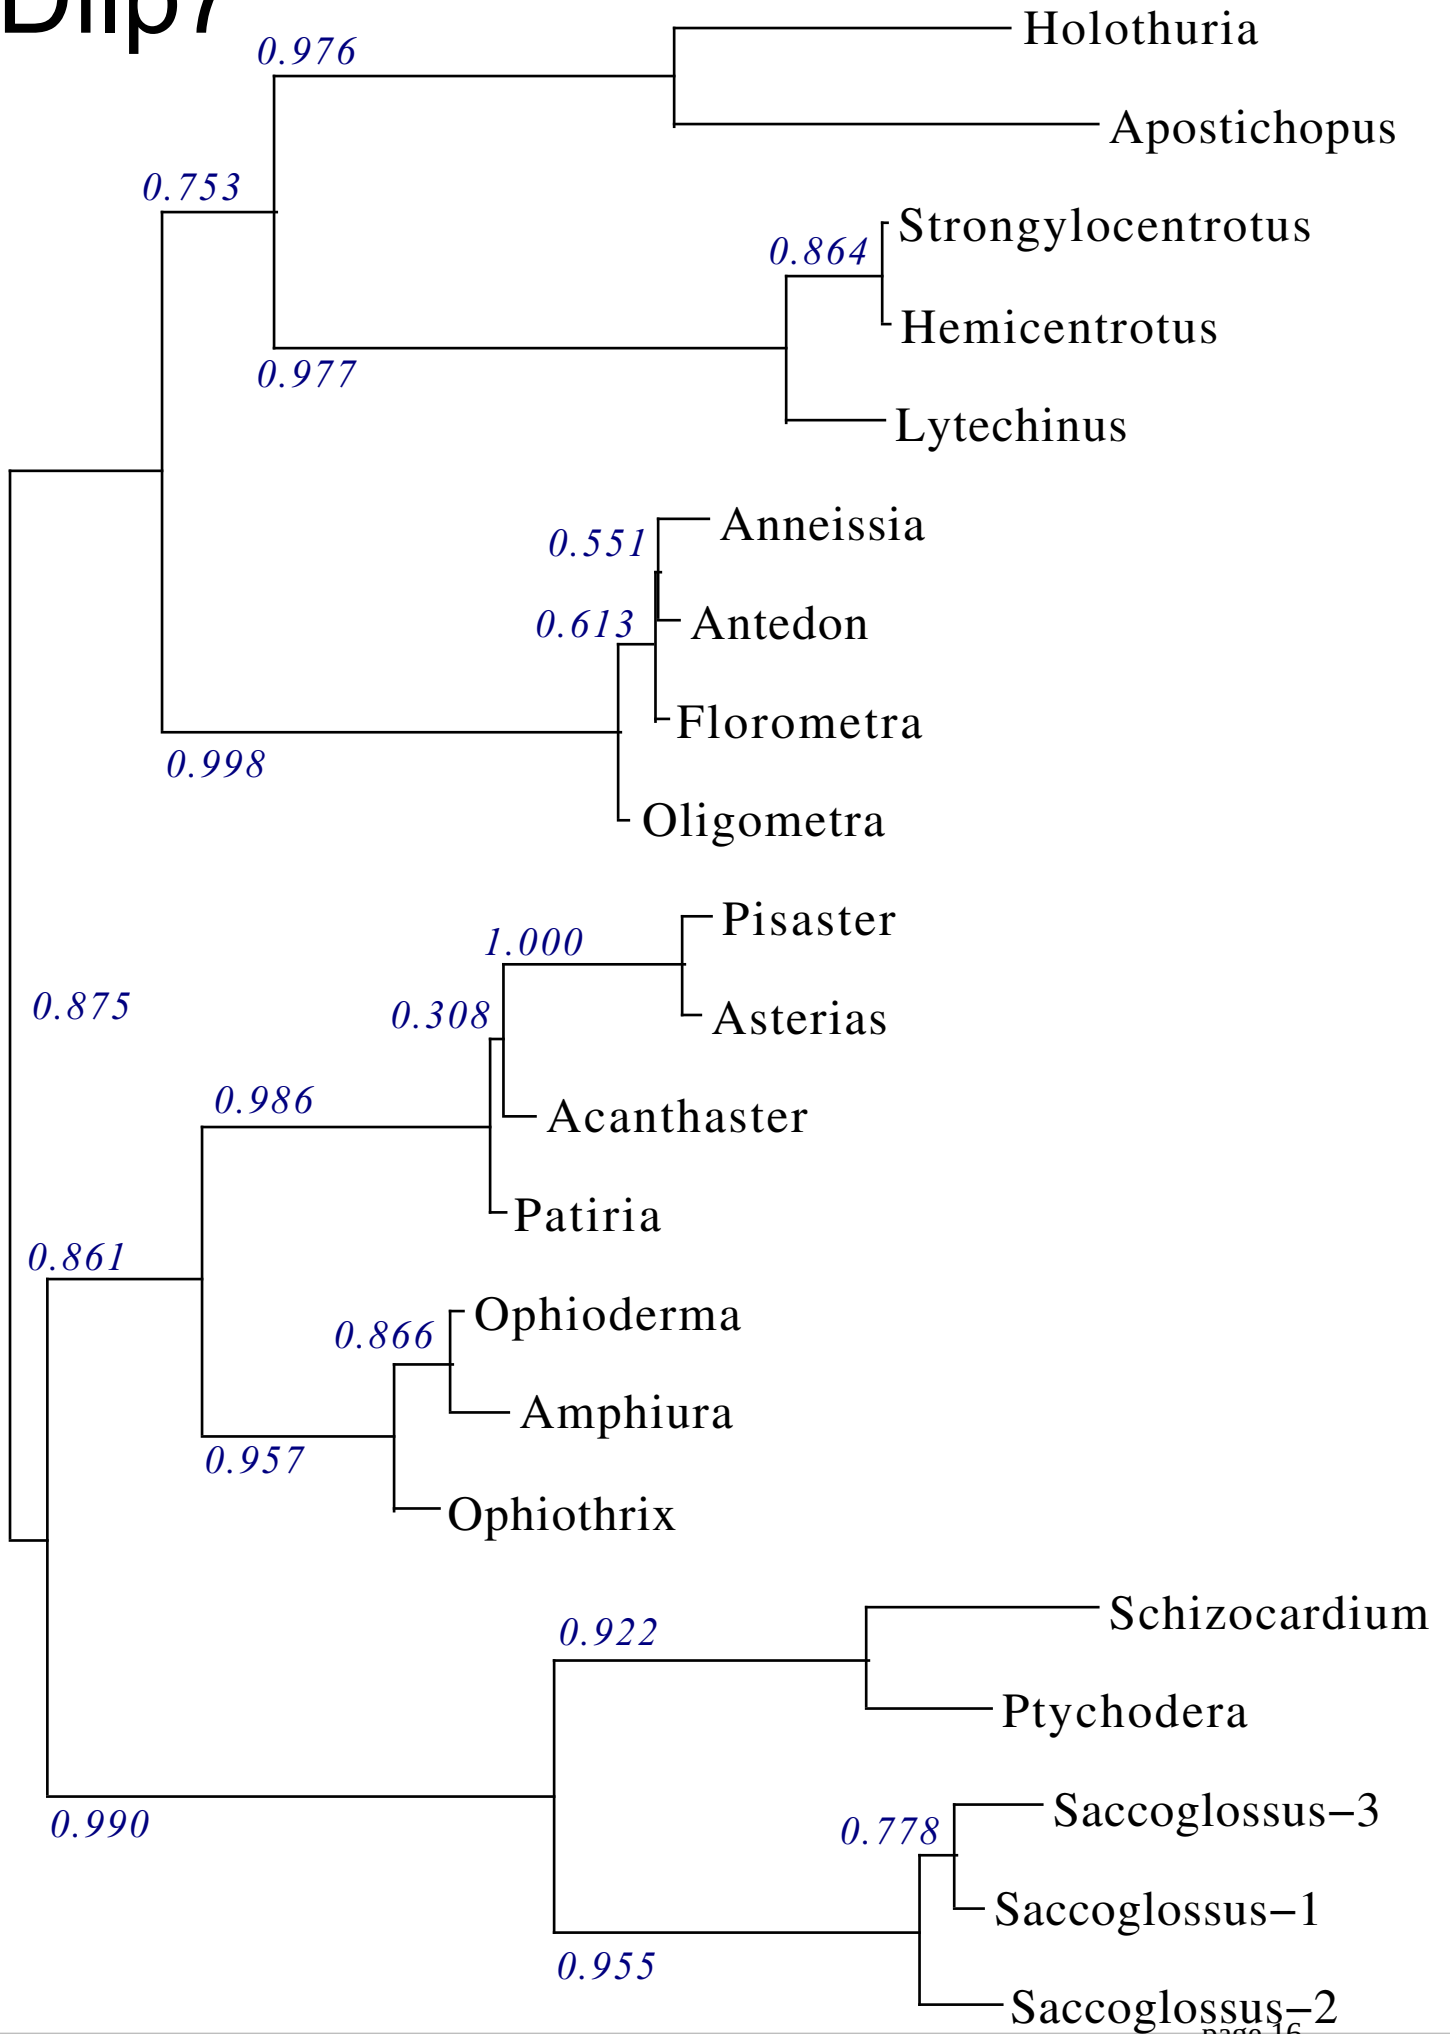

Figure S6. Phylogenetic tree of ambulacrarian dilp7 orthologs.





Anneissia E C C Y N P C S S F E M I K Y C C P T R Q I E L H N R N P N S S E D K -----  
 Oligometra E C C Y N P C S R F E M V K Y C C T S R Q I E F H E S E G K K -----  
 Antedon E C C Y N P C T R F E M I K Y C C T S R Q I E F N D T E G K K -----  
 Florometra E C C Y N P C S R F E M I K Y C C T S R Q L E F N D T E G K K -----  
 Lytechinus E C C N K F C D P G E M I L Y C C E K R Q I E W A H F H N L L K A -----  
 Hemicentrotus E C C N K F C D P G E M V L Y C C E K R Q I E W A Q F H N L L K A -----  
 Strongylocentrotus E C C N K F C D P G E M V L Y C C E K R Q I E W A Q F H N L L K A -----  
 Apostichopus E C C E K N C E I R E M V F Y C C A E K Q R E Y A S F F P E I F R N R I R H T -----  
 Holothuria E C C R R S C D I F E M I F Y C C A A Q Q Q F Y A E F F K L V K R S -----  
 Asterias E C C L K R C T T N E L M L Y C C E E K Q R E Y F S F V G W L S R R -----  
 Pisaster E C C L K R C T T N E M M L Y C C E E K Q R E Y F S F V G W L A R R -----  
 Acanthaster E C C H R Q C A V S E M M L Y C C E Q K Q R E Y Y T F V G W L K R R -----  
 Patiria E C C H R P C S V N E M M L Y C C E Q K Q R E Y Y T F V G W L K R R -----  
 Amphiuira E C C T S Q C E A G E M I L Y C C Q E R Q R E W H S V R G F F N K -----  
 Ophioderma E C C T Q Q C E I G E M V L Y C C Q E R Q R E W H S M M G F F N K -----  
 Ophiothrix E C C T Q Q C D T G E M I L Y C C Q E R Q R E W H I M M G L Y N K -----  
 Saccoglossus-1 E C C Y S Q C S L T H M I T Y C C A E V Q N E F Q V F I N I L G N T D E S S E N D G D D G E E S S S V H E D ---  
 Ptychodera-1 D C C Y R R C N L Q K M M T Y C C A E R Q R E L N N F F S L L N Q K D N G S T -----  
 Schizocardium-1 H C C N H H C S F T E L L I Y C C E E R S E E F Y S F I G L L R M D D E D T D A S L E K G N G D V E A E D N T D L  
 Saccoglossus-2 A C C K E Y C P L P K I T E F C C D E R Q Q E F H Q F M S S F A S T E E -----  
 Ptychodera-2 K C C N R R C T I H K M M Q F C C E A R R N E F H K F L A L M G N T D N -----  
 Schizocardium-2 V C C D N Y C S L D K I T E F C C E D L Q Q E F R Q F M S F V S N S K -----  
 Saccoglossus-3 D C C Y H T C P T E R K T I Q Y C C F E V Q A Q Y R L F M E S A I -----  
 Ptychodera-3 E C C R N R C S V E R K T I Q Y C C D E I Q K E F A F F F S L F G S -----  
 Ptychodera-4 E C C R R Y C T L S R R I Q Y C C Y E V Q L E Y Q I Y Y E S R N E E -----  
 Ptychodera-5 E C C R S F C S L E R R I Q Y C C Y N V Q A R F A I F K E M S K E M S K E R G M -----  
 Ptychodera-6 E C C R G T C S L E R K T I Q Y C C Y E I Q K E F A L F K Y G Y R S -----  
 Ptychodera-7 E C C H T Y C S F E R K T I Q Y C C N A V Q Q E F A L F K S G Y R S -----  
 Ptychodera-8 E C C H S R C S L Q R K T I Q Y C C D E I Q E E L A L F L S L F G S -----  
 Schizocardium-3 E C C L R T C T V I E K T H Y C C R E K Q I E L Y I I I Q S A P W L V D N Q R -----

Anneissia -----  
 Oligometra -----  
 Antedon -----  
 Florometra -----  
 Lytechinus -----  
 Hemicentrotus -----  
 Strongylocentrotus -----  
 Apostichopus -----  
 Holothuria -----  
 Asterias -----  
 Pisaster -----  
 Acanthaster -----  
 Patiria -----  
 Amphiuira -----  
 Ophioderma -----  
 Ophiothrix -----  
 Saccoglossus-1 -----  
 Ptychodera-1 -----  
 Schizocardium-1 D Q G D D D D N T Q N N E G G S I D V V V E R D V G D V L L K T D K S K P  
 Saccoglossus-2 -----  
 Ptychodera-2 -----  
 Schizocardium-2 -----  
 Saccoglossus-3 -----  
 Ptychodera-3 -----  
 Ptychodera-4 -----  
 Ptychodera-5 -----  
 Ptychodera-6 -----  
 Ptychodera-7 -----  
 Ptychodera-8 -----  
 Schizocardium-3 -----

Figure S7-continued.

# Octinsulin

0.2

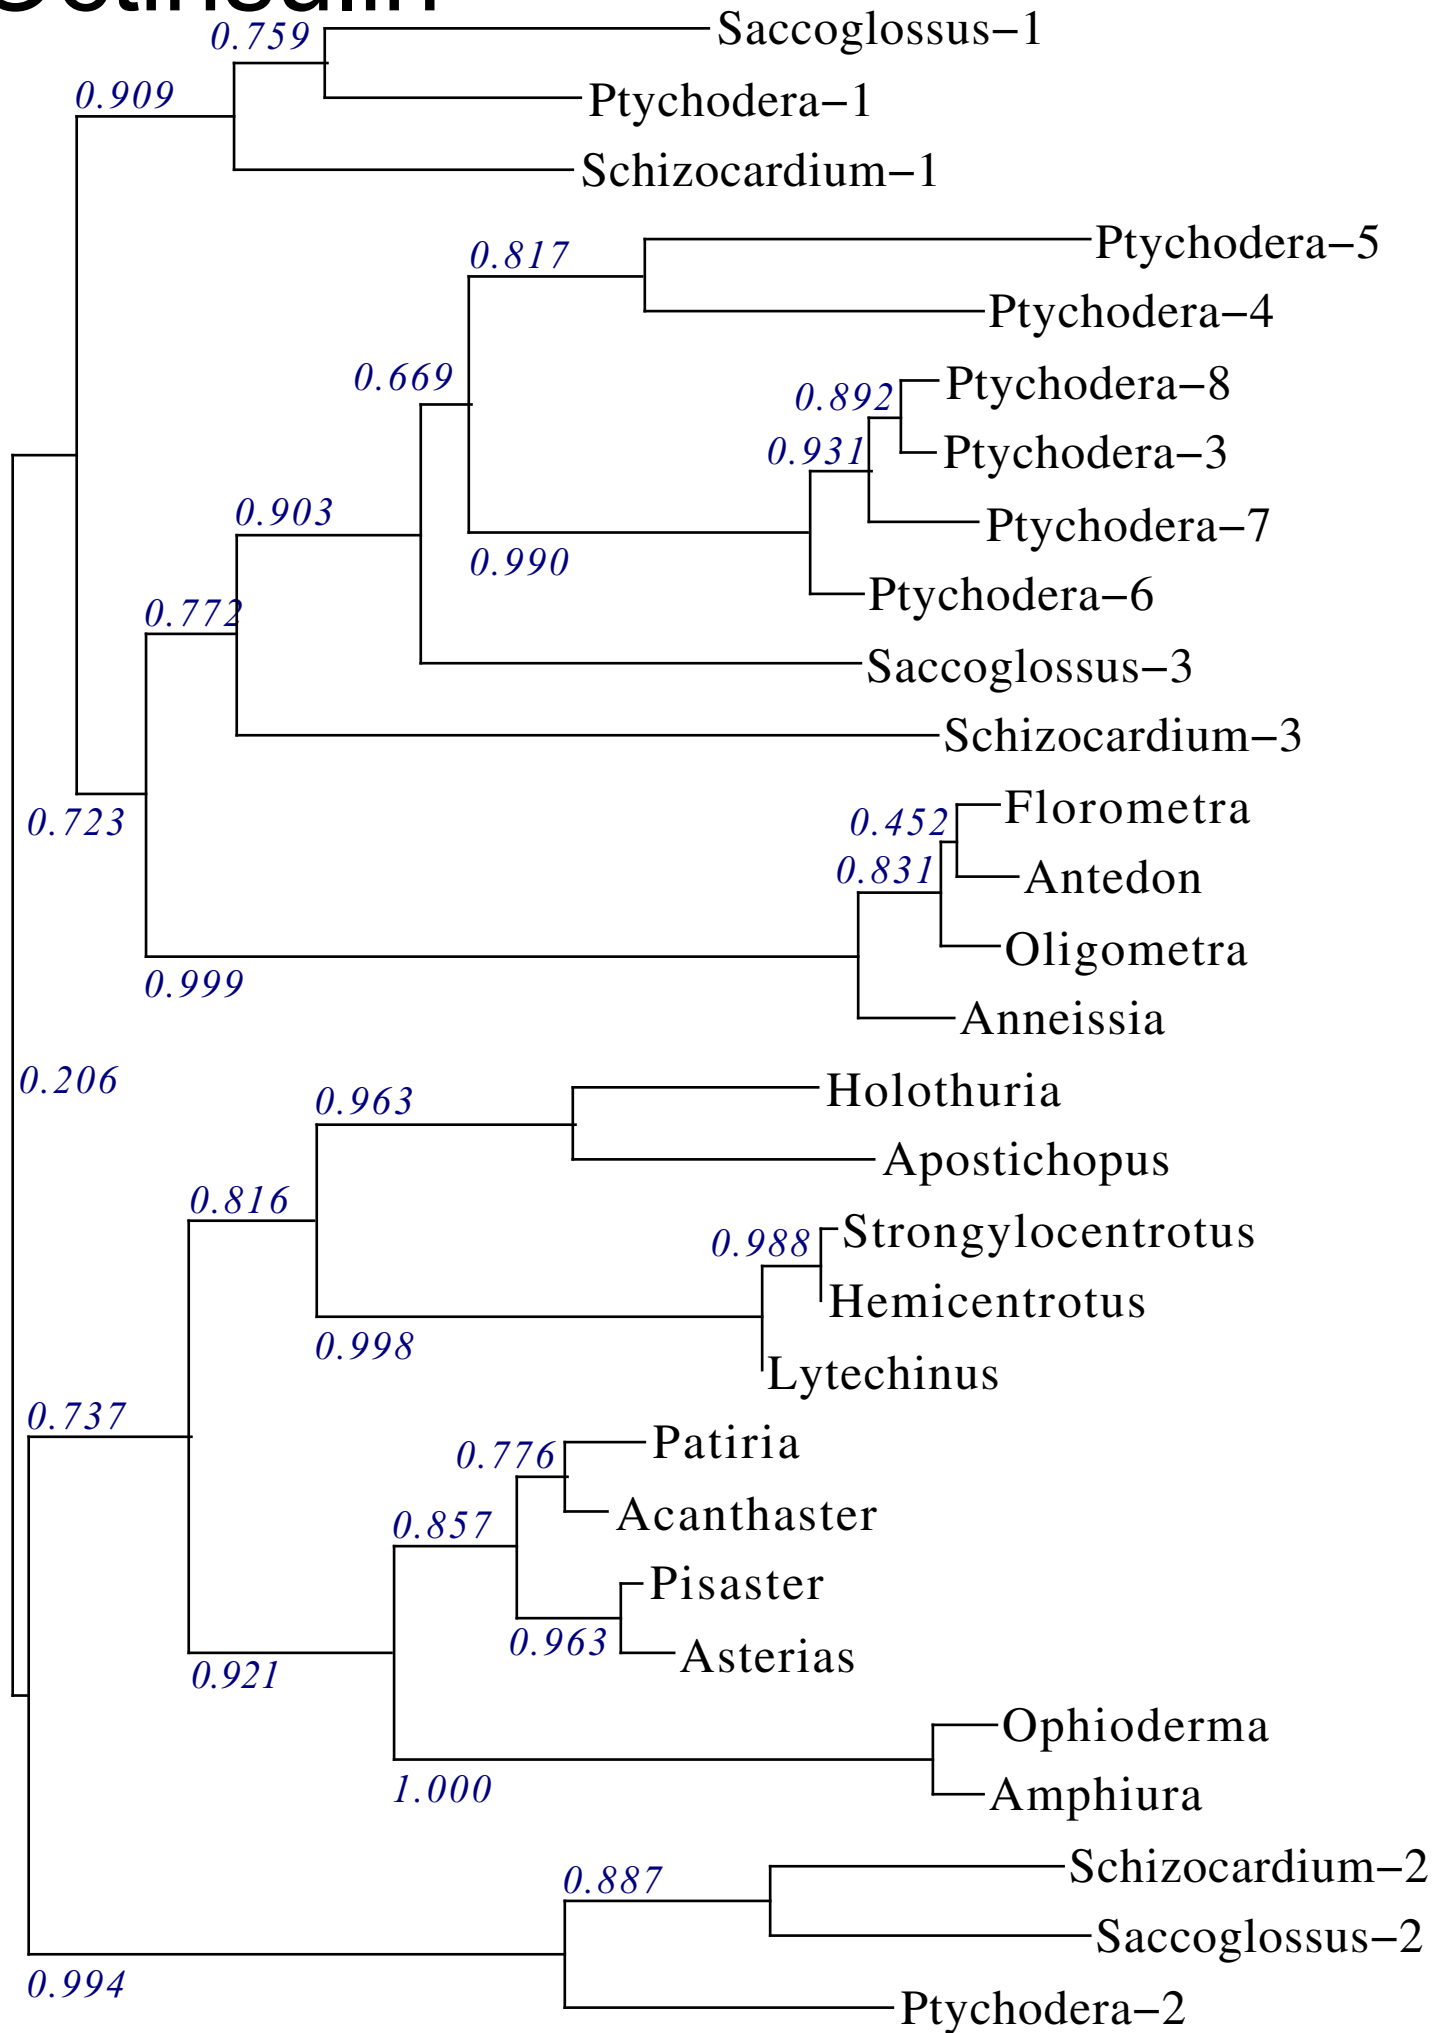

Figure S8. Phylogenetic tree of ambulacrarian octinsulins.

```

Amphiura-1 -----
Amphiura-15 -----FD-----LP-----GREPGP
Amphiura-16 -----FLSDATSKKT-NEEALY-----AQAMKR
Amphiura-2 -----YLTDAEH-----AER
Amphiura-3 -----YLTDAEH-----AER
Amphiura-7 YQDSDLRRTLLDALEQSLRADSGDAPS-----MKT-----SKRA
Amphiura-6 IPDGYLRSLMDALQQIERADSGHAGV-DA-----TAMKT-----AERE
Amphiura-8 YQDSDLRRTLLDELKQ--RADSRDAAA-----IDT-----NKRD
Amphiura-9 YQETDLRRTLLEALKQ--REDSGDAPA-----INT-----NKKG
Amphiura-5 -----YP-----GALTRGTN
Amphiura-10 YPDTYLRTLLDQIVDSDATSKKT-NERAPDAYAMK-----
Amphiura-11 YPDTYLRTLLDQIVDSDATSKKT-NERAPDAYAMK-----
Amphiura-4 FPDNYLRTLLDALEKISDSDATGKRQ-MYADPDIARPPA-----
Amphiura-14 FPDNYLRTLLDALEKIADSDATAKRQ-LYDDEDLVRKPG-----
Ophioderma-10 -----DTETT-SSEEPDEWDEINP-TAIA-----ETKD
Ophioderma-3 -----TKS-DNEEPDEWEVLHP-GE-----IREQSPD
Ophioderma-8 -----TKS-ADEEPDEWEVLHP-GE-----PREPVS
Amphiura-13 -----KS-NSEEPDEHTT-----TTAPTTVGTDD
Amphiura-17 -----TKS-IDEEPDELVSQGT-TTTGTTTAAVGRRDD
Amphiura-18 -----TKS-IDEEPDELSMQAT-T-----TVAARRRDD
Ophioderma-1 -----DEIGAMKS-QNEEPDEHDSHIG-TT-----PVIN
Ophioderma-2 -----TKT-ANEPPDEWGLIPT-MP-----PAPTDSL
Ophioderma-4 -----TNP-VNEEPDEGGLAP-----
Ophioderma-7 -----TTT-INEEPDEGGQAK-----
Amphiura-12 -----APNLFEDL-LRR-----DHVEQSGNITCM--
Acanthaster-5 -----VPRKPEEP-----SISAHCGMLLELRQ
Patiria-6 -----VPRKPGE-----ISAHCGMLVELRQ
Asterias-4 -----KLNKPEETIDV-----TSSEHCGFVKEFRQ
Pisaster-2 -----KLNMPKDEVLSV-----ESEHCSAVKEFRQ
Pisaster-5 -----AQ-----QKSGHGPLLREVRQ
Asterias-1 -----ELRSQDGLMREVRQ
Pisaster-3 -----EPRPDGLLREVRQ
Asterias-2 -----APNHNGLLREAKR
Pisaster-4 -----EPNHYGLLKETKR
Patiria-2 -----DVPKPLA--DSE-----IDSNEDGEME----
Acanthaster-6 -----DDPKPSESAAIAE-----DDSNKGDIE----
Acanthaster-7 -----DGPKLSES-----TAIDSDIE----
Patiria-1 -----APPANDGIEVLTGGKIEE-----DDFEG---D-DFD
Acanthaster-2 -----LL-DLH
Acanthaster-1 -----HP-DAD
Acanthaster-8 -----HS-GAD
Acanthaster-9 -----HP-GAD
Patiria-5 -----EP-----ADFNKDDKID-DLD
Patiria-8 -----DKTD-DWH
Ophioderma-5 -----NSLTRDADDAPVAMDDKPTSPRPIDI I KRSRHLRCAQFKDMAL
Ophioderma-6 -----AAVSPVHGSCVELK----
Ophioderma-9 -----AAFNSVPVSCADFQ----
Asterias-3 -----ELNVASCQQQLADQVK
Pisaster-1 -----TELDEASCKQLADQVK
Acanthaster-3 -----DKTPSTASCEALAAQIS
Patiria-7 -----DKAPSAATCEALAAATVK
Acanthaster-4 -----SDTG--ADD-----DKVHIDDATCQALANQVK
Patiria-3 -----DDAE--FKD-----GAIVIDDEVCEKLAQVK
Patiria-4 -----DDAE--FKD-----GAIVIDDEVCEKLAQVK

```

Figure S9. Sequence alignment of ambulacrarian multinsulins.

Amphiura-1 -----DWVGFRTI**C**DPP-FTPSLYIEDF**C**GVT---VKR-----  
 Amphiura-15 ASYV--ADNTWTGKTNI**C**NYE-Q-QVVYHREL**C**GH---QKR-----  
 Amphiura-16 YILN--PWSGWAGGKTE**C**NTQ-TQESDF-DHAC**R**-----  
 Amphiura-2 IDLA--KRKDW-----**C**NNA--AHEF-SRL**C**N-----  
 Amphiura-3 IDLA--KRKDW-----**C**NNA--AHEF-SRL**C**N-----  
 Amphiura-7 WEKE----FRSR---AE**C**ERQ-WK-LEL-DGH**C**ISH-----  
 Amphiura-6 EGVK--RG---GVTP**L**CKSA-K--DRA-GKF**C**VYW-----  
 Amphiura-8 EGNE--KRFVSMHSQA**C**YSD-**I**YTYRK-PGI**C**PTR-----  
 Amphiura-9 TDAR--D-----G**C**EAN-**I**N--VKV**S**QL**C**-----  
 Amphiura-5 --DS--MNLRADFKLKL**C**GTE-**I**TLER--YYA**C**GKR--DLK-----  
 Amphiura-10 ---R--GEYNWSGKT**L**CGGT-**I**QTYK--GNI**C**WGK--REAK-----  
 Amphiura-11 ---R--GEYNWSGKT**L**CGGT-**I**QTYK--GNI**C**WGK--REAK-----  
 Amphiura-4 --VF--DWQDWSGKKKI**C**TAF-DQQQH**F**-NGV**C**Q-----KRR-----  
 Amphiura-14 --VF--DWEDWSGNKNI**C**GRH-TQNQYY-NGV**C**QQYEGTGKRR-----  
 Ophioderma-10 PVMM--RDKKWR-TSW**F**CGSD-**I**FRAK--KFI**C**SPR--SYVRHIPY-----RKR-----  
 Ophioderma-3 IELD--HVKRWHSSVRI**C**SS--KYRVQ--EAI**C**DPR--NAKREVS-----  
 Ophioderma-8 TELD--HVKRWHSSVRM**C**SS--MHRVK--ETI**C**DPR--NAKREVS-----  
 Amphiura-13 NAIL--MKRSWSG**T**KKHL**C**G**Y**Q-**I**NNER--SSV**C**GFK-----RD-----  
 Amphiura-17 DSST--LMKRWYG**T**VQ**L**CGSH-**I**TKVK--SVI**C**NP**G**--RPFKREE-----  
 Amphiura-18 DSST--LMKRWNGYVQ**L**CGSH-**I**TKVK--GVI**C**NP**G**--APFKRDE-----  
 Ophioderma-1 RSGT--MEKRWRGYVYI**C**EPQ-**I**TRLK--NVI**C**NPA--SVKRS-----  
 Ophioderma-2 RSNM--LEKRWRGATKI**C**GST-**I**NTVQ--SVV**C**HPN--NYKRD-----  
 Ophioderma-4 -----LGKRWSGSNKL**C**GEA-**I**SRAT--KNL**C**NPL--SAKRD-----  
 Ophioderma-7 -----KGWSFTTGEKI**C**GDD-**I**HTAT--TDV**C**FPD--SEKRD-----  
 Amphiura-12 AYATMLEYEPNEEAY**T**W**C**DAN-**I**EHQR--EGI**C**SCV--EYI**K**EHNK**R**SL**F**-----  
 Acanthaster-5 MLDN**P**GLD-KRSPRNYW**C**GTT-**I**NNRK--SAL**C**SCN--H-----H-----  
 Patiria-6 MLDN**P**GLE-KRSPRNYW**C**GTA-**I**NNRK--STL**C**SCN--H-----H-----  
 Asterias-4 LSDN**P**TLM-KRSPRNYW**C**SST-**I**ERRK--EAL**C**SCP--W-----H-----  
 Pisaster-2 LADN**P**GVV-KRSPRNYW**C**NTA-**I**SQRK--TAL**C**GCT--H-----H-----  
 Pisaster-5 LFKGRNSQ-VRSE**T**HYW**C**WEV-**I**EKNR--ESI**C**NGP-----PQPTQ**H**-----  
 Asterias-1 LARNGRH**F**-RAAEDHIY**C**GVV-**I**EQNR--ESV**C**GVI-----PGS-----  
 Pisaster-3 LGRK**P**GH-TRAEDHIY**C**GAV-**I**EQNR--EQV**C**GIV-----PAS--R-----  
 Asterias-2 ILGRR**G**HQSRWDE**T**HFY**C**DDA-**I**EQQR--EVI**C**DPN--HTHAPVQ**P**T**P**TGG**P**LP**P**TV**S**-----  
 Pisaster-4 VFRRR**G**FQ**P**TN**C**EEAVEY**C**DA-**I**GQKR--EVL**C**QHN--HGTDAPRDSAV**G**-----A-----  
 Patiria-2 TKSG**F**SVA-WTGPQMWV**C**SSST**A**ARK--HYV**C**HP**P**--GRHHH**H**KRE-----DE-----  
 Acanthaster-6 AKG**D**FSVA-WSGPQMWV**C**RGR-**I**RRRR--RYA**C**HP**P**--GRH**H**Y**K**KRN-----DVQ-----  
 Acanthaster-7 AKG**D**FSVA-DNGPKLWV**C**QGN-**V**TNTL--KNV**C**THT--GR**P**HS**D**TRD-----DVQ-----  
 Patiria-1 KNKNQYYS-RSGPRFRV**C**GTT-**T**HSWS--SFV**C**HP**S**--GLI-----HH-----  
 Acanthaster-2 AKEGR**I**LV---RYPHY**C**NGI-**I**QIKY--NQL**C**HP**Q**--P-----P-----  
 Acanthaster-1 AKHG**G**NLA---YRANY**C**GAT-**I**YEKV--RET**C**HAV--R-----R-----  
 Acanthaster-8 TKEG**G**RVV---RYPHY**C**GAT-**I**QEKY--REI**C**HAL--R-----R-----  
 Acanthaster-9 TKEG**G**RVA---RYPHY**C**GAS-**I**QEKY--REI**C**HAF--R-----R-----  
 Patiria-5 EDDG**Q**LET---RKPHY**C**GHR-**I**LRKY--AKI**C**HHV--TLHRR**P**H--H-----LAA-----  
 Patiria-8 ADLG--QK---RSPHY**C**GRH-**I**GTKI--GOI**C**GWH--L-----L-----EAW-----  
 Ophioderma-5 DHFRR-LVGKER**V**FAKY**C**SPT-**P**QTVM--DNY**C**QCD--VVPR**S**I-----D-----  
 Ophioderma-6 -----KARELGAKHR**F**CGEE-**I**TYVR--NSY**C**SCR--VIPR**D**M-----N-----  
 Ophioderma-9 -----SAQKRGNLHKL**C**GSE-**I**TAAV--DNY**C**QCK--VIPR**D**M-----S-----  
 Asterias-3 EGKKRWD----G**P**SHK**F**CGET-**I**NEKR--YAY**C**TCG--LVPR**K**R-----E-----  
 Pisaster-1 EGKKRWT----G**S**W**H**T**F**CGET-**I**NEK**K**--YAY**C**TCG--LVPR**K**R-----E-----  
 Acanthaster-3 EGKKRWD----G**P**S**H**T**F**CGED-**I**NERR--NAY**C**NCQ--VVPR**K**R-----E-----  
 Patiria-7 EGKKRWD----G**P**A**H**T**F**CGET-**I**TEKA--NAY**C**HCQ--VVPR**K**R-----E-----  
 Acanthaster-4 ERGRR**P**WSRTG**P**KHY**F**CGPT-**I**EKK**K**--EAY**C**NC**K**--VVPR**K**R-----D-----  
 Patiria-3 EKS----ILGV**G**P**K**HWY**C**NP**T**-**I**ER**K**K--EQY**C**TC**S**--VVPR**E**R-----D-----  
 Patiria-4 EKS----ILGV**G**P**K**HWY**C**NP**T**-**I**ER**K**K--EQY**C**TC**S**--VVPR**E**R-----D-----

Figure S9-continued.

Amphiura-1 -----EYE-ATDPLGFLK-----MRGMVK---RLNP---NWRELMSEECYEST  
 Amphiura-15 -----EIE-AEDALGFLK-----MKLRGM---EKRG---GWQEYMNEECIEWCT  
 Amphiura-16 -----LY-GRDALDFLK-----LRDVVK---RA---SFNDIKEWIHEECLERCI  
 Amphiura-2 -----N-RRDALDFLN-----LRDVRN---KVHAFTNYIKEAVHEECCESCI  
 Amphiura-3 -----N-RRDALDFLN-----LRDVRN---KLHAFTQYIKEGVYEECCDETCI  
 Amphiura-7 --PYRRDMP-DVDALAFLN-----KRG-----KSLNGLYHECCDESCS  
 Amphiura-6 INRRDIEVS-MPDALGFL-----KTE-----VQARDLNHECCVETCS  
 Amphiura-8 RSEDIQQLG-MQGALAFLN-----KRE-----MVKRDLFHECCVETCT  
 Amphiura-9 RREDIQQLD-TPDAFAFL-----KRE-----LVQRDLYHECCVEQCD  
 Amphiura-5 --DALTFLE-DGA-----NRKRD LHEECCVETCS  
 Amphiura-10 --DALAFLE-TDDRQ-----TDADP-LGIWALISTTLNEECCGEACY  
 Amphiura-11 --DALAFLE-TDDRQ-----MDPLSTFISLALISTTLNEECCGEACY  
 Amphiura-4 --DIPQQLD-TPDALGFLQ-----AKRI-----AGFEKDVYESMTEECCLEGCT  
 Amphiura-14 --DIPQQLD-TPDALGFLQ-----AEK-----RKDVVFESINEECCAEQCS  
 Ophioderma-10 RSVGDATLI-KQDADMFLN-----RQKR-----RKSSYSLYEECCGEFCS  
 Ophioderma-3 DNGVPGGVA-KETAKRFLK-----RQRR-----GEWGKGDLEEECCHEGCS  
 Ophioderma-8 DNGVPGGVA-KETAKRFLK-----RQRR-----GEWGKGDLEEECCHEGCS  
 Amphiura-13 AEDALDFLK-QDIV-----KRS LTEECCHEGCS  
 Amphiura-17 SEAALAFLK-EERAKRFLQ-----ADQQLLHQQLHQP SLRLWGG LTEECCNEHCS  
 Amphiura-18 GEAALAFLN-EERAKRFLQ-----PDQQ-----QLDQPNRLWGG ISEECCNEHCS  
 Ophioderma-1 DTAGLEFLT-EHQAKRFLM-----QNKR-----IWGGGLSEECCNEGCS  
 Ophioderma-2 --ETAALVG-EQQAKRFLR-----KR-----WWGGAGGLTEECCNEGCS  
 Ophioderma-4 --ETTAVME-ERRAKRFLI-----EKRSS LNEECCNEGCA  
 Ophioderma-7 --A---IIQ-EKGAKRFE-----NKRLW-----GWSWSTHGS LNEECCNEGCV  
 Amphiura-12 --KRMAEVT-EDVAKRFE SLLVLEVERAR-----RPKTS LQEECCNESCY  
 Acanthaster-5 SLLSDELIE-SKEANSFL-----KRG I-----EK-RS LTEECCHEGCV  
 Patiria-6 TFL-----K-SDEANFEL-----KRGV-----EK-RS LSEECCHEGCV  
 Asterias-4 TLRDDDFMEEKKDATNFL-----ERGV-----EK-RS LHEECCNEGCV  
 Pisaster-2 TLRDDDFMEEKKDATNFL-----ERGI-----EK-RS LSEECCHEGCV  
 Pisaster-5 YDSTTEFVG-AREAKGFL-----GKD-----FTNLHEECCFEGCT  
 Asterias-1 --KRNLFVR-KEAASEFL-----ERG-----VQGLAEECCGEGCT  
 Pisaster-3 LSKRNVFVG-KEAASDFL-----KRG-----VQGLGEECCGEGCT  
 Asterias-2 PGHQDAFVG-KNEASRFL-----GRGV-----VQGLIEECCFEGCH  
 Pisaster-4 IRSQDEFVK-RREASKFL-----GRGA-----FQGLLEECCHEGQ  
 Patiria-2 -DNSDAFLT-EDDANTEFLA-----SPSK-----RKANI IHEECCHEGCF  
 Acanthaster-6 EESNPEFLD-EAEANFFLR-----R-----HKRNHI SEECCHEGCV  
 Acanthaster-7 EENNPEFLD-EADANFFLR-----Q-----QNSKQ ISEECCHEGCV  
 Patiria-1 KRDNDEFLS-AGEANTEFLM-----SEGV-----GK-RGMHEECCHEGCV  
 Acanthaster-2 EVFDQDFLD-SKEANTEFL-----KQRI-----GK-RS LIEECCFEGCT  
 Acanthaster-1 GVSNQEF LD-SKDASTFLF-----GRGI-----EK-RGLHHECCTEGCS  
 Acanthaster-8 GVSNQEF LD-SKDANTEFLF-----GRGI-----GK-RNLNEECCSEGD  
 Acanthaster-9 GVSNQEF LD-SKDANTEFLF-----GRGI-----GK-RNLNEECCGEGCD  
 Patiria-5 NEAPSAFVE-SDEANSFLD-----NRGI-----SK-RGLHEECCHEGCS  
 Patiria-8 DDVHPAFVE-SDEANSFLA-----DRRI-----SK-RS LGEECCHEGCS  
 Ophioderma-5 --DKRAEVD-KSSAKSEFLN-----HRA-----ST-RS LDEECCNEGCV  
 Ophioderma-6 P-----G-LEDAKAFK-----MRSP-----ST-RS ISEECCYETCY  
 Ophioderma-9 P-----G-LEDAKAFK-----MRSP-----ST-RS ISEECCYETCY  
 Asterias-3 -LELSEFLN-RGKANGFLS-----ARNV-----QK-RS LSEECCHEGCV  
 Pisaster-1 -LDLSEFLN-RGKANGFLS-----ARNL-----QK-RS LSEECCSEGCY  
 Acanthaster-3 -LDLSEFLP-SGKANAFLS-----GRRI-----TK-RS LSEECCHEGCV  
 Patiria-7 -LELSEFLT-PVKANSEFLS-----GRNI-----AK-RS LTEECCHEGCV  
 Acanthaster-4 DGDQSEFLK-PEKAGSFLE-----SSI-----GK-RDFNHECCKEGCV  
 Patiria-3 -ADRAEFLE-PEEAGGFLN-----R-----SK-RD LNHECCDEGCV  
 Patiria-4 -ADRAEFLE-PEEAGGFLN-----R-----SK-RD LNHECCDEGCV

Figure S9-continued.

|               |   |   |   |   |   |   |   |   |       |       |   |   |       |   |   |       |   |   |   |   |   |   |   |   |   |
|---------------|---|---|---|---|---|---|---|---|-------|-------|---|---|-------|---|---|-------|---|---|---|---|---|---|---|---|---|
| Amphiura-1    | S | E | E | I | K | E | L | C | ----- |       |   |   |       |   |   |       |   |   |   |   |   |   |   |   |   |
| Amphiura-15   | M | E | E | V | K | E | L | D | C     | ----- |   |   |       |   |   |       |   |   |   |   |   |   |   |   |   |
| Amphiura-16   | V | E | E | V | V | E | L | C | ----- |       |   |   |       |   |   |       |   |   |   |   |   |   |   |   |   |
| Amphiura-2    | N | E | E | V | L | E | F | C | ----- |       |   |   |       |   |   |       |   |   |   |   |   |   |   |   |   |
| Amphiura-3    | D | E | E | V | L | E | F | C | P     | ----- |   |   |       |   |   |       |   |   |   |   |   |   |   |   |   |
| Amphiura-7    | M | E | E | F | G | E | H | C | T     | Q     | R | P | E     | S | Q | E     | G | F | N | P | F | K | L | G | K |
| Amphiura-6    | D | E | E | V | K | E | H | C | V     | M     | T | K | ----- |   |   |       |   |   |   |   |   |   |   |   |   |
| Amphiura-8    | T | E | E | I | Q | E | T | C | ----- |       |   |   |       |   |   |       |   |   |   |   |   |   |   |   |   |
| Amphiura-9    | A | E | E | I | E | E | T | C | ----- |       |   |   |       |   |   |       |   |   |   |   |   |   |   |   |   |
| Amphiura-5    | M | N | E | I | E | E | D | C | ----- |       |   |   |       |   |   |       |   |   |   |   |   |   |   |   |   |
| Amphiura-10   | R | E | E | I | A | E | T | C | ----- |       |   |   |       |   |   |       |   |   |   |   |   |   |   |   |   |
| Amphiura-11   | R | E | E | I | A | E | T | C | ----- |       |   |   |       |   |   |       |   |   |   |   |   |   |   |   |   |
| Amphiura-4    | K | G | E | V | Q | E | L | C | P     | ----- |   |   |       |   |   |       |   |   |   |   |   |   |   |   |   |
| Amphiura-14   | K | H | E | I | Q | E | L | C | ----- |       |   |   |       |   |   |       |   |   |   |   |   |   |   |   |   |
| Ophioderma-10 | M | E | E | L | D | E | T | C | ----- |       |   |   |       |   |   |       |   |   |   |   |   |   |   |   |   |
| Ophioderma-3  | M | E | E | V | N | E | T | C | ----- |       |   |   |       |   |   |       |   |   |   |   |   |   |   |   |   |
| Ophioderma-8  | M | E | E | V | N | E | T | C | ----- |       |   |   |       |   |   |       |   |   |   |   |   |   |   |   |   |
| Amphiura-13   | W | E | E | I | K | E | T | C | ----- |       |   |   |       |   |   |       |   |   |   |   |   |   |   |   |   |
| Amphiura-17   | V | E | E | I | N | E | V | C | ----- |       |   |   |       |   |   |       |   |   |   |   |   |   |   |   |   |
| Amphiura-18   | L | E | E | V | N | E | Y | C | ----- |       |   |   |       |   |   |       |   |   |   |   |   |   |   |   |   |
| Ophioderma-1  | V | E | E | I | D | E | V | C | ----- |       |   |   |       |   |   |       |   |   |   |   |   |   |   |   |   |
| Ophioderma-2  | N | E | E | V | N | E | S | C | ----- |       |   |   |       |   |   |       |   |   |   |   |   |   |   |   |   |
| Ophioderma-4  | S | E | E | I | S | E | H | C | ----- |       |   |   |       |   |   |       |   |   |   |   |   |   |   |   |   |
| Ophioderma-7  | T | E | E | I | R | E | H | C | ----- |       |   |   |       |   |   |       |   |   |   |   |   |   |   |   |   |
| Amphiura-12   | V | Q | E | V | Y | D | H | C | D     | K     | H | F | D     | G | S | I     | - | Y | D | L | F | R | S | - | - |
| Acanthaster-5 | Y | E | E | V | Y | E | L | C | ----- |       |   |   |       |   |   |       |   |   |   |   |   |   |   |   |   |
| Patiria-6     | Y | E | E | V | Y | E | L | C | ----- |       |   |   |       |   |   |       |   |   |   |   |   |   |   |   |   |
| Asterias-4    | Y | E | E | V | Y | E | L | C | ----- |       |   |   |       |   |   |       |   |   |   |   |   |   |   |   |   |
| Pisaster-2    | Y | E | E | V | Y | E | V | C | ----- |       |   |   |       |   |   |       |   |   |   |   |   |   |   |   |   |
| Pisaster-5    | V | E | E | V | N | E | S | C | ----- |       |   |   |       |   |   |       |   |   |   |   |   |   |   |   |   |
| Asterias-1    | I | E | E | I | S | E | S | C | ----- |       |   |   |       |   |   |       |   |   |   |   |   |   |   |   |   |
| Pisaster-3    | V | E | E | I | S | E | S | C | ----- |       |   |   |       |   |   |       |   |   |   |   |   |   |   |   |   |
| Asterias-2    | S | E | E | I | H | E | H | C | P     | ----- |   |   |       |   |   |       |   |   |   |   |   |   |   |   |   |
| Pisaster-4    | A | E | E | I | H | E | H | C | P     | K     | V | Y | ----- |   |   |       |   |   |   |   |   |   |   |   |   |
| Patiria-2     | W | E | E | I | L | E | Y | C | ----- |       |   |   |       |   |   |       |   |   |   |   |   |   |   |   |   |
| Acanthaster-6 | W | E | E | I | L | E | Y | C | ----- |       |   |   |       |   |   |       |   |   |   |   |   |   |   |   |   |
| Acanthaster-7 | W | E | E | V | L | E | Y | C | ----- |       |   |   |       |   |   |       |   |   |   |   |   |   |   |   |   |
| Patiria-1     | W | E | E | M | L | E | H | C | ----- |       |   |   |       |   |   |       |   |   |   |   |   |   |   |   |   |
| Acanthaster-2 | N | E | E | I | Y | E | V | C | ----- |       |   |   |       |   |   |       |   |   |   |   |   |   |   |   |   |
| Acanthaster-1 | I | E | E | I | Y | E | S | C | ----- |       |   |   |       |   |   |       |   |   |   |   |   |   |   |   |   |
| Acanthaster-8 | D | E | E | I | Y | E | T | C | ----- |       |   |   |       |   |   |       |   |   |   |   |   |   |   |   |   |
| Acanthaster-9 | D | E | E | I | Y | E | I | C | ----- |       |   |   |       |   |   |       |   |   |   |   |   |   |   |   |   |
| Patiria-5     | N | R | E | V | R | K | H | C | ----- |       |   |   |       |   |   |       |   |   |   |   |   |   |   |   |   |
| Patiria-8     | N | E | E | V | R | E | H | C | ----- |       |   |   |       |   |   |       |   |   |   |   |   |   |   |   |   |
| Ophioderma-5  | L | E | E | I | V | E | L | S | K     | T     | M | C | S     | S | S | ----- |   |   |   |   |   |   |   |   |   |
| Ophioderma-6  | Y | E | E | I | E | E | V | C | ----- |       |   |   |       |   |   |       |   |   |   |   |   |   |   |   |   |
| Ophioderma-9  | Y | E | E | I | E | E | V | C | ----- |       |   |   |       |   |   |       |   |   |   |   |   |   |   |   |   |
| Asterias-3    | W | E | E | I | E | E | V | C | ----- |       |   |   |       |   |   |       |   |   |   |   |   |   |   |   |   |
| Pisaster-1    | W | E | E | I | E | E | V | C | ----- |       |   |   |       |   |   |       |   |   |   |   |   |   |   |   |   |
| Acanthaster-3 | W | E | E | I | E | E | V | C | ----- |       |   |   |       |   |   |       |   |   |   |   |   |   |   |   |   |
| Patiria-7     | W | E | E | I | E | E | V | C | ----- |       |   |   |       |   |   |       |   |   |   |   |   |   |   |   |   |
| Acanthaster-4 | W | E | E | V | E | E | Q | C | H     | ----- |   |   |       |   |   |       |   |   |   |   |   |   |   |   |   |
| Patiria-3     | W | E | E | V | E | E | H | C | H     | ----- |   |   |       |   |   |       |   |   |   |   |   |   |   |   |   |
| Patiria-4     | W | E | E | V | E | E | H | C | H     | ----- |   |   |       |   |   |       |   |   |   |   |   |   |   |   |   |

Figure S9-continued.

# Multinsulin

0.5

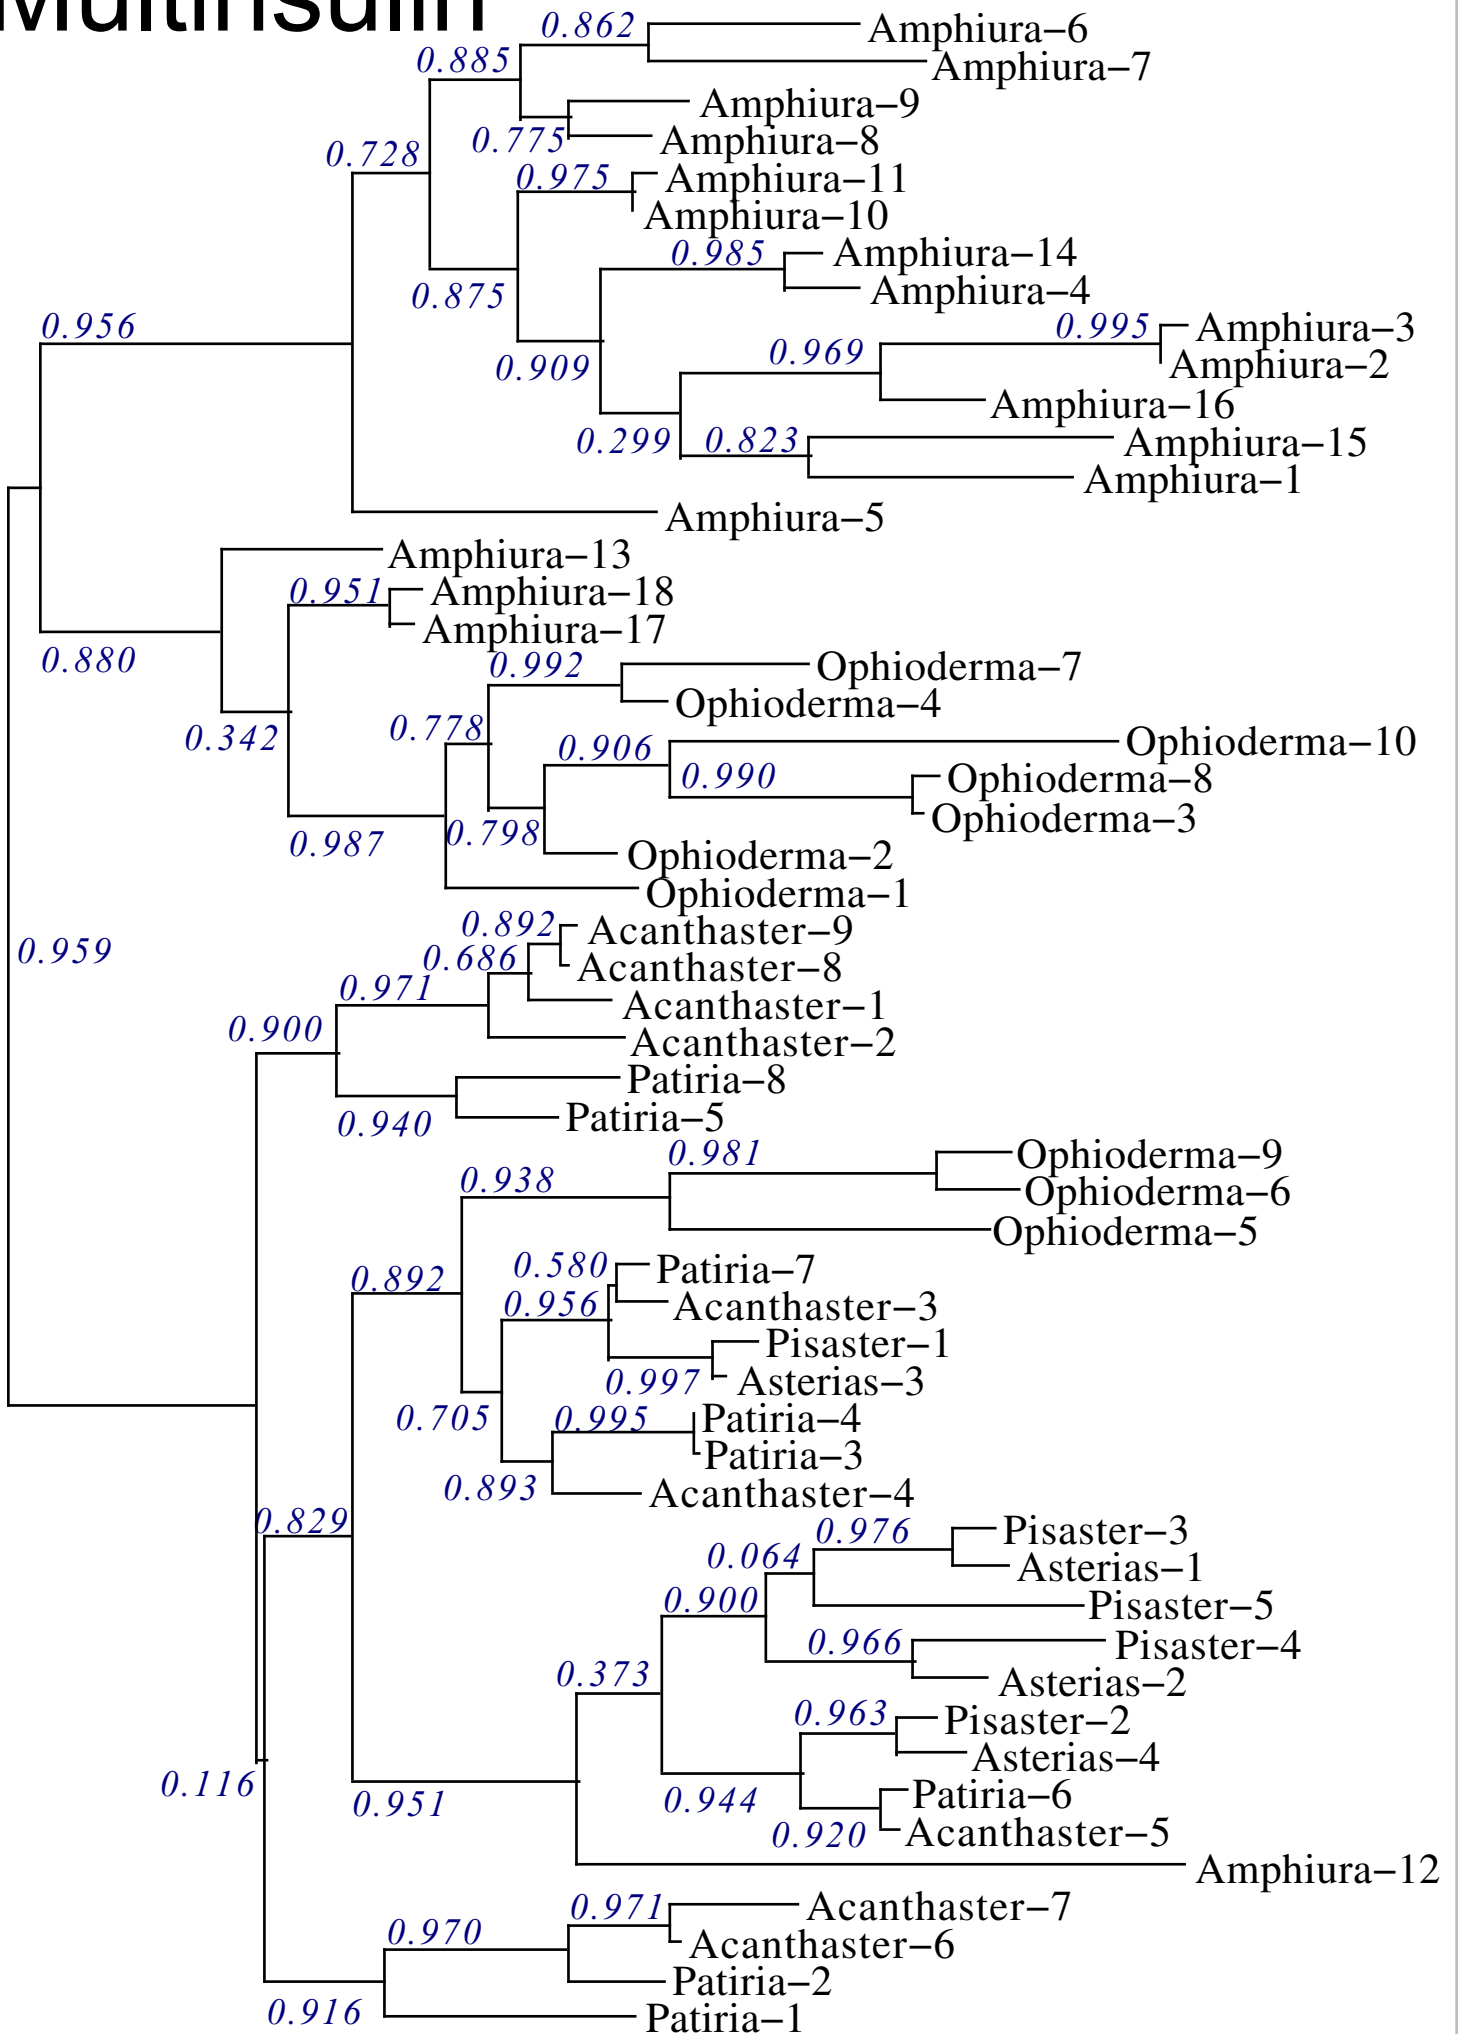

Figure S10. Sequence similarity tree of ambulacrarian multinsulins.



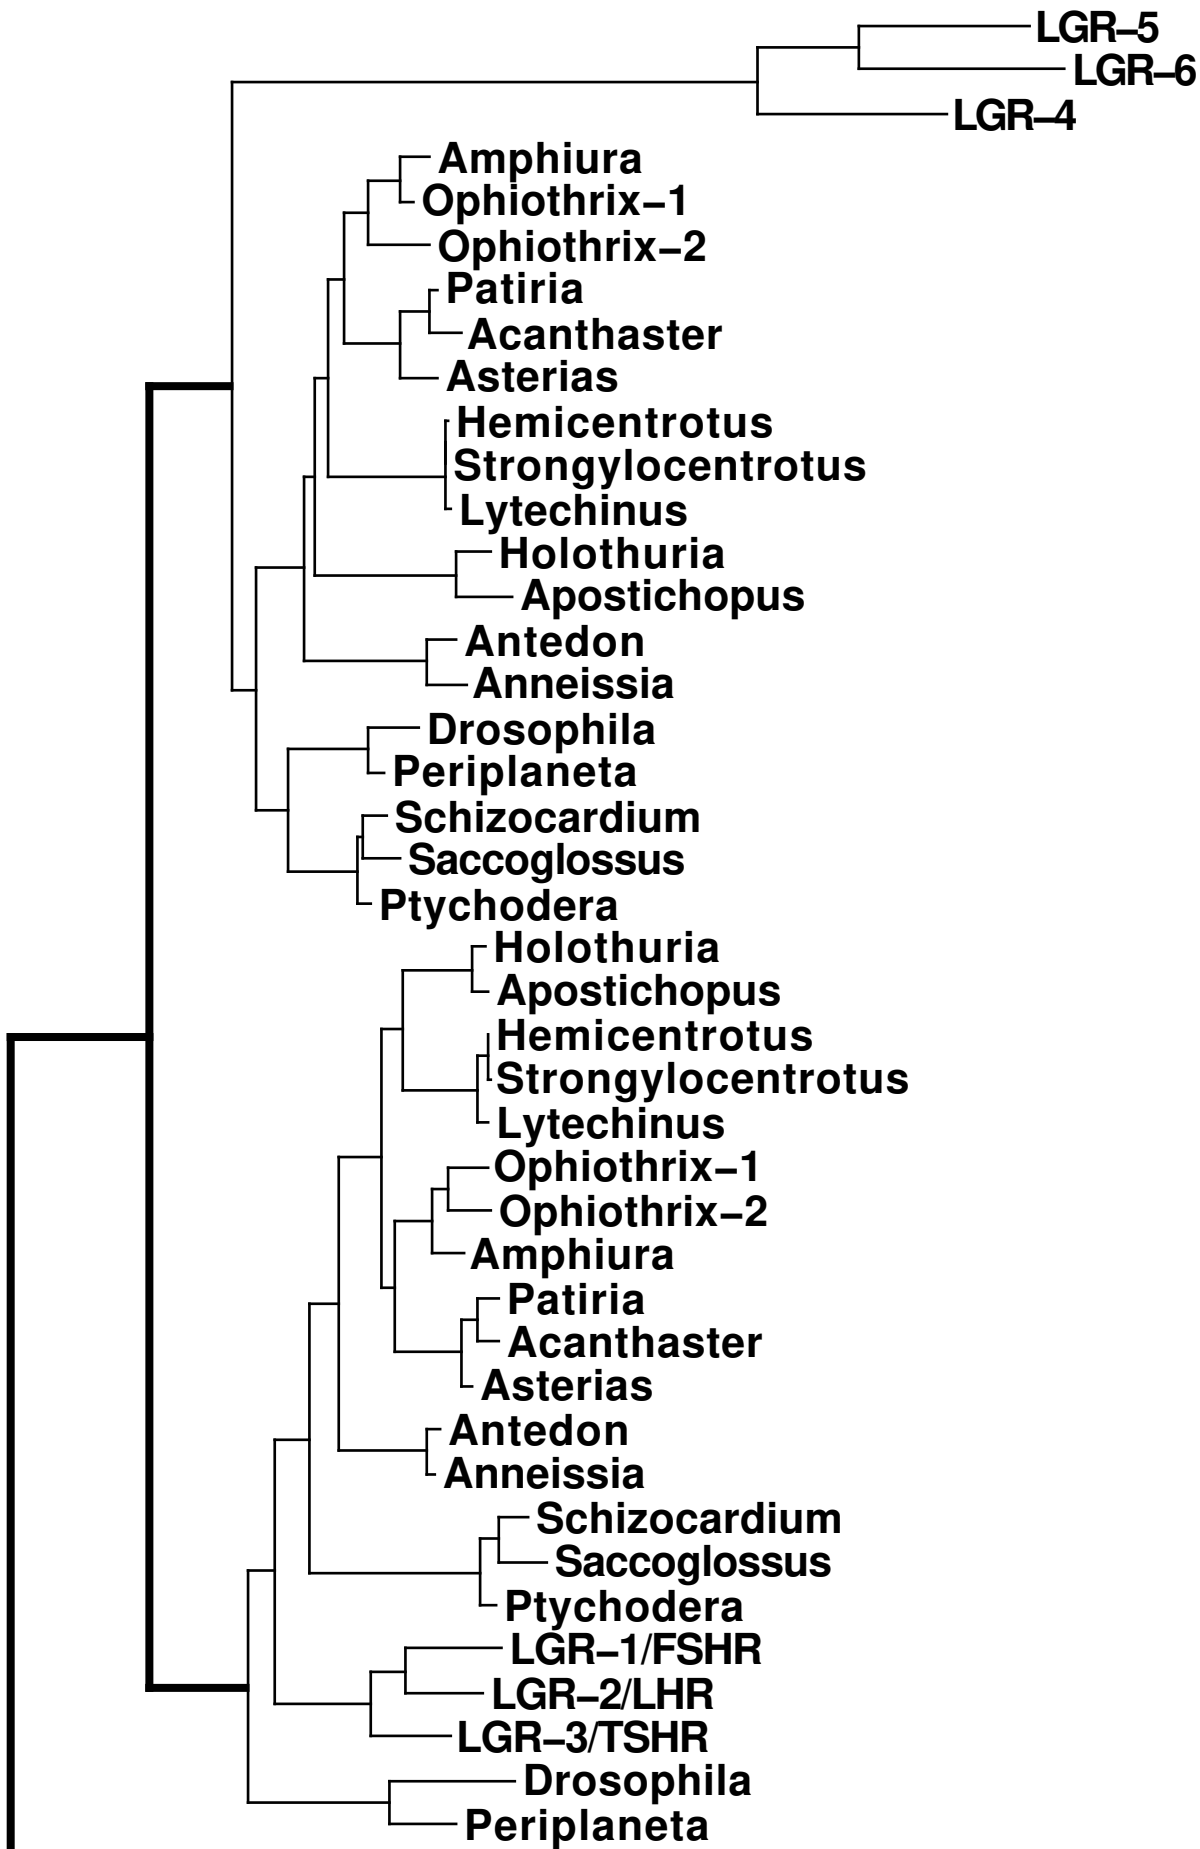

Figure S11. Phylogenetic tree of bursicon and GPA2/GPB5 receptors.

Ptychodera  
 Periplaneta  
 Anneissia  
 Apostichopus  
 Strongylocentrotus  
 Patiria  
 MEMKEPAEDGNKTKIRAGSDGTPRPRNILTSSRSRASRSRSGDGRGVSWSAASSMLH

Ptychodera  
 Periplaneta  
 Anneissia  
 Apostichopus  
 Strongylocentrotus  
 Patiria  
 -----MFIVITL~~LA~~TLPG-----VTSNE  
 ---MQCRRSVACGLAV~~AVVLA~~-----LAALTFLL  
 -----MCSSKLAGLICIFVL  
 -----MLTRT~~GK~~WILLSVTM-----IALTS  
 -----MKMEI~~I~~LRVV~~T~~FTSA-L--AAMSRT~~G~~SCQ-----W  
 RLRTRQCKVLVLCVL~~LL~~ILV~~LAV~~TFIGVSLTGNDVAQPGNNEFIPATVKTEYEELIG

Ptychodera  
 Periplaneta  
 Anneissia  
 Apostichopus  
 Strongylocentrotus  
 Patiria  
 LPOSFS~~C~~PDGY~~F~~Q~~C~~GNV--TE~~C~~VHOKY~~F~~~~C~~DGKAD~~C~~VDGFDEIPTK~~C~~RDNFGWANLISRI  
 SQTHGAC~~A~~EGET~~F~~~~C~~GNSS--SI~~C~~LPORFI~~C~~NGHID~~C~~PNGEDES~~K~~YTDVHGSNFNQDI~~V~~  
 LPFTYC~~C~~QSGT~~F~~~~C~~GDDKEQ~~C~~FPQEF~~Q~~CNDVVD~~C~~TNAADEQ--D~~C~~EKAGFGDDFDRR  
 PCWAFE~~C~~PKGE~~F~~~~V~~~~C~~GNL--TK~~C~~VKOKY~~Q~~CNEIDD~~C~~GNNADE~~E~~EEV~~C~~RNFE~~G~~VWKSMDKV  
 ANDLIE~~C~~DPGF~~F~~~~C~~GNSS--TE~~C~~VAQ~~Q~~F~~Q~~DDIAH~~C~~QNADES--G~~C~~AIDGWLAFD~~V~~  
 FSSEYT~~C~~PKGE~~F~~~~R~~~~C~~GNL--TH~~C~~VAQ~~K~~Y~~Q~~CNGEDD~~C~~GNNADE~~T~~--E~~C~~EHNEGWI~~K~~TFDEQ

**LDLa**

Ptychodera  
 Periplaneta  
 Anneissia  
 Apostichopus  
 Strongylocentrotus  
 Patiria  
 TTFDKSNNDTLQPRNFIRRCETDDYPEACECT-FTSVSCANANLTGIP~~TN~~ISGSVTHL  
 IN---RNY---SQAFND~~C~~LES~~L~~PRGCLCRDKT~~W~~VFCRELGLTH~~V~~POD~~I~~STNV~~TR~~L  
 HNTTIVLKYD-VGNYNTNVCLIPVYPPVCKCGNKTEVDCSATG~~M~~TTIPQA~~I~~SRN~~I~~SR  
 F---DEKD---NIERECET~~T~~NYPVCD~~C~~VNGEK~~L~~CSNKG~~L~~TE~~V~~PSVPPNT---  
 HPVSVGETK-----ALNECALAQY~~P~~DGCV~~C~~SKLT~~Q~~LD~~C~~SEFN~~L~~NE~~V~~PPN~~L~~PENIT~~R~~L  
 NPVPVDLDW-----QINQ~~E~~CGLY~~G~~FPDVCV~~C~~FEETELKCIQVN~~L~~TQ~~V~~PSV~~S~~ANL~~T~~R

Ptychodera  
 Periplaneta  
 Anneissia  
 Apostichopus  
 Strongylocentrotus  
 Patiria  
 YVSGNK~~I~~KR~~L~~EPGIF~~F~~KEY~~P~~NLL~~T~~LS~~L~~FDNA~~V~~EK~~L~~EEDTF~~Q~~GL~~P~~RI~~E~~K~~L~~YL~~N~~DNK~~I~~KE~~I~~  
 ILSNN-SIT~~L~~SQDS~~F~~KKY~~H~~NLE~~L~~HL~~G~~WNO~~T~~SD~~I~~ENG~~M~~F~~K~~G~~Q~~RT~~L~~RR~~L~~F~~L~~SK~~N~~S~~L~~TE~~L~~  
 TLLGND~~I~~Q~~T~~ILNNS~~F~~VNFE~~Q~~LHK~~L~~T~~L~~AQNG~~L~~VR~~M~~E~~I~~NA~~F~~NG~~L~~TE~~L~~K~~Q~~LY~~L~~SEN~~N~~IK~~E~~I  
 -----SH~~L~~I~~L~~MNN~~Q~~I~~H~~D~~I~~EL~~T~~A~~F~~E~~G~~L~~T~~N~~L~~K~~V~~LY~~L~~SEN~~P~~IST~~L~~  
 YLKSNN~~I~~VNIGSELLAN~~Y~~SS~~L~~VY~~L~~NLMGN~~R~~I~~H~~E~~I~~A~~E~~NS~~F~~R~~N~~L~~R~~N~~L~~K~~R~~L~~F~~L~~S~~EN~~N~~I~~S~~R~~I~~  
 NLNGN-MV~~H~~L~~E~~DGAF~~E~~RY~~T~~K~~L~~GS~~L~~NLM~~O~~NG~~I~~RE~~L~~RD~~V~~ER~~G~~L~~T~~D~~L~~K~~L~~Y~~L~~S~~T~~NR~~I~~ST~~I~~

**LRR**

Ptychodera  
 Periplaneta  
 Anneissia  
 Apostichopus  
 Strongylocentrotus  
 Patiria  
 EDGAFRS~~L~~Q~~K~~LAW~~L~~M~~L~~NN~~N~~H~~L~~KS~~L~~EG~~G~~ME~~F~~E~~G~~LES~~V~~Y~~L~~N~~L~~KD~~N~~E~~V~~TEAD~~F~~G~~L~~T~~F~~TH~~M~~  
 R~~P~~G~~V~~L~~Q~~D~~L~~P~~H~~L~~S~~W~~L~~V~~L~~Q~~D~~N~~C~~I~~S~~D~~I~~D~~L~~D~~T~~E~~Q~~Y~~L~~-N~~L~~T~~W~~L~~D~~M~~T~~R~~N~~N~~L~~T--L~~K~~G~~K~~-I~~F~~P~~D~~L  
 P~~S~~G~~V~~F~~L~~P~~L~~K~~R~~L~~E~~W~~L~~V~~L~~D~~Y~~N~~E~~L~~T~~T~~L~~L~~G~~N~~P~~E~~K~~G~~L~~L~~S~~L~~Y~~W~~L~~S~~V~~R~~H~~N~~K~~I~~N~~D~~A~~N~~I~~R~~T~~-V~~L~~E~~N~~L  
 R~~A~~G~~V~~F~~R~~D~~L~~I~~N~~L~~E~~W~~L~~F~~L~~V~~N~~N~~T~~L~~R~~S~~L~~D~~D~~D~~A~~E~~I~~G~~L~~R~~K~~V~~Y~~W~~L~~R~~L~~N~~S~~N~~L~~L~~E~~D~~L~~S~~D~~G~~T~~-P~~F~~R~~H~~M  
 Q~~T~~G~~A~~F~~N~~G~~L~~S~~G~~L~~H~~W~~L~~F~~L~~N~~D~~N~~K~~M~~R~~T~~L~~E~~P~~G~~I~~E~~L~~G~~L~~E~~G~~L~~Y~~W~~L~~D~~M~~R~~N~~N~~E~~I~~R~~D~~L~~Q~~E~~G~~E~~-A~~L~~K~~D~~L  
 T~~P~~G~~T~~F~~R~~E~~L~~Q~~N~~L~~T~~W~~L~~F~~L~~N~~E~~N~~E~~I~~E~~T~~L~~D~~E~~D~~V~~E~~E~~G~~L~~H~~K~~V~~Y~~W~~L~~M~~L~~Q~~N~~K~~I~~G~~D~~L~~N~~H~~G~~V-A~~F~~R~~D~~L

**LRR**

Ptychodera  
 Periplaneta  
 Anneissia  
 Apostichopus  
 Strongylocentrotus  
 Patiria  
 P~~S~~L~~E~~W~~L~~N~~L~~G~~D~~N~~D~~I~~K~~H~~L~~H~~T~~G~~M~~F--P~~N~~N~~S~~A~~L~~K~~V~~L~~F~~L~~G~~S~~N~~L~~I~~Q~~S~~I~~H~~E~~D~~T~~L~~R~~G~~L~~D~~T~~L~~E~~D~~L~~D~~L  
 P~~E~~L~~K~~Q~~L~~I~~L~~E~~D~~N~~T~~I~~E~~T~~I~~G~~E~~F~~T~~L--T~~N~~L~~K~~A~~L~~Q~~A~~L~~D~~L~~T~~K~~N~~R~~I~~Y~~I~~H~~P~~K~~A~~F~~A~~N~~L~~W~~N~~L~~E~~E~~L~~L  
 P~~S~~L~~A~~W~~L~~E~~L~~D~~H~~N~~K~~I~~T~~R~~I~~E~~A~~E~~D~~F--A~~R~~D~~T~~P~~M~~S~~T~~L~~S~~L~~K~~N~~N~~E~~V~~S~~Y~~V~~H~~P~~L~~A~~F~~T~~S~~L~~I~~N~~L~~D~~L~~D~~L~~  
 Q~~E~~L~~K~~W~~C~~D~~L~~G~~S~~N~~K~~I~~T~~K~~I~~T~~S~~G~~T~~F--Q~~G~~E~~T~~G~~L~~Q~~T~~D~~L~~S~~N~~N~~K~~I~~H~~T~~I~~S~~K~~G~~A~~F~~L~~G~~Q~~D~~N~~L~~T~~V~~L~~N~~L~~  
 K~~S~~L~~V~~W~~L~~D~~F~~E~~G~~N~~D~~I~~R~~S~~I~~N~~A~~R~~S~~F--A~~G~~N~~T~~S~~L~~T~~V~~L~~I~~L~~R~~N~~S~~I~~E~~S~~I~~E~~R~~D~~A~~F~~T~~S~~L~~G~~T~~L~~V~~E~~L~~D~~L~~  
 P~~K~~L~~M~~W~~L~~D~~M~~S~~N~~N~~P~~L~~H~~H~~L~~S~~A~~D~~N~~F~~S~~A~~S~~G~~N~~P~~P~~L~~S~~I~~L~~M~~L~~S~~N~~C~~N~~I~~S~~T~~I~~Q~~K~~D~~T~~E~~Q~~A~~F~~R~~E~~L~~T~~A~~L~~H~~V~~

**LRR**

Ptychodera  
 Periplaneta  
 Anneissia  
 Apostichopus  
 Strongylocentrotus  
 Patiria  
 S~~D~~N~~L~~I~~S~~T~~I~~P~~A~~K~~T~~F~~H~~E~~L~~I~~S~~L~~A~~K~~L~~N~~L~~C~~N~~N~~R~~K~~L~~R~~R~~L~~P~~L~~E~~L~~F~~S~~N~~L~~H~~Q~~L~~R~~T~~L~~N~~L~~T~~G~~V~~K~~I~~T~~N~~I~~D~~  
 S~~G~~N~~Q~~L~~V~~S~~L~~S~~S~~S~~V~~E~~F~~N~~L~~T~~F~~L~~M~~K~~L~~S~~L~~S~~N~~N--P~~F~~R~~L~~L~~P~~T~~Q~~L~~F~~R~~R~~L~~E~~N~~L~~R~~S~~L~~G~~L~~V~~D~~T~~D~~I~~Q~~N~~I~~D~~  
 C~~G~~N~~K~~I~~S~~E~~L~~S~~P~~M~~Q~~E~~K~~N~~L~~T~~K~~L~~D~~R~~L~~A~~L~~G~~F~~N--L~~F~~D~~S~~L~~P~~L~~N~~I~~F~~D~~D~~L~~V~~N~~L~~Q~~S~~L~~R~~L~~E~~G~~I~~T~~I~~N~~N~~I~~D~~  
 T~~L~~N~~N~~I~~S~~S~~V~~P~~K~~G~~L~~S~~S~~E~~L~~P~~M~~L~~T~~T~~L~~S~~L~~S~~F~~N--P~~I~~Q--L~~D~~E~~L~~S~~F~~S~~G~~F~~H~~N~~L~~K~~E~~I~~D~~L~~V~~G~~V~~D~~I~~P~~N~~I~~N~~  
 S~~H~~N~~Q~~I~~S~~H~~L~~P~~E~~G~~I~~E~~D~~G~~L~~H~~T~~L~~E~~I~~L~~R~~L~~R~~N~~N--P~~L~~F~~S~~L~~P~~V~~D~~V~~F~~R~~G~~M~~K~~L~~V~~D~~L~~D~~L~~A~~E~~I~~I~~I~~G~~N~~I~~  
 S~~G~~N~~K~~I~~G~~H~~F~~P~~S~~G~~L~~E~~R~~N~~M~~A~~N~~L~~T~~V~~L~~T~~I~~A~~N~~N--P~~A~~T~~S~~L~~P~~E~~D~~L~~F~~D~~D~~L~~V~~L~~D~~D~~L~~N~~L~~G~~G~~L~~V~~I~~N~~N~~I~~S

**LRR**

Ptychodera  
 Periplaneta  
 Anneissia  
 Apostichopus  
 Strongylocentrotus  
 Patiria  
 T~~K~~M~~F~~N~~S~~M~~O~~K~~L~~E~~H~~L~~Y~~F~~A~~K~~F~~H~~Y~~C~~S~~Y~~A~~S~~H~~V~~R~~D~~C~~S~~P~~K~~S~~D~~G~~I~~S~~S~~L~~E~~N~~L~~L~~A~~N~~K~~V~~L~~R~~C~~F~~I~~W~~I~~V~~A~~A~~  
 V~~E~~L~~F~~A~~H~~C~~P~~K~~L~~E~~F~~L~~Y~~F~~S~~K~~E~~Y~~Y~~C~~T~~Y~~A~~P~~A~~V~~R~~I~~C~~R~~P~~N~~T~~D~~G~~V~~S~~S~~L~~K~~H~~L~~L~~V~~K~~P~~A~~L~~R~~V~~T~~V~~W~~V~~V~~A~~A~~  
 Q~~R~~M~~F~~E~~K~~M~~E~~K~~L~~S~~I~~V~~F~~S~~S~~E~~F~~Q~~Y~~C~~S~~Y~~A~~P~~H~~V~~R~~N~~C~~N~~P~~K~~T~~D~~G~~I~~S~~S~~I~~Y~~N~~L~~L~~E~~S~~T~~A~~L~~R~~V~~S~~W~~T~~I~~A~~  
 N~~A~~M~~F~~E~~Q~~I~~N~~S~~L~~I~~L~~H~~F~~E~~R~~F~~E~~Y~~C~~K~~F~~A~~H~~V~~R~~N~~C~~N~~P~~K~~T~~D~~G~~I~~S~~S~~T~~E~~N~~L~~L~~E~~G~~A~~L~~I~~R~~V~~S~~W~~T~~I~~A~~  
 V~~D~~M~~F~~Q~~L~~T~~R~~L~~E~~K~~V~~A~~F~~D~~K~~E~~Y~~C~~R~~Y~~A~~P~~H~~V~~R~~T~~C~~T~~P~~R~~S~~D~~G~~I~~S~~S~~F~~E~~N~~L~~L~~K~~N~~V~~L~~R~~V~~E~~V~~W~~T~~I~~G~~I  
 A~~R~~M~~F~~K~~G~~M~~T~~N~~L~~Q~~H~~I~~E~~F~~F~~K~~E~~Y~~C~~R~~Y~~A~~A~~H~~V~~R~~T~~C~~K~~P~~R~~S~~D~~G~~I~~S~~S~~F~~E~~N~~L~~L~~K~~D~~G~~I~~L~~R~~V~~S~~W~~T~~I~~A~~L~~

Hinge region

Figure S12. Sequence alignment of various gonadulin receptors.

Ptychodera TLVLCNLA VILGRMCIMK IENKVHSLLIK NLCCGAD LLMGIYLV IIGSHDLMYRNHY YI  
 Periplaneta VTCAGNALV LWGRF-SSRDENRVHSLVIRNLAVSD LLMGVYLLVIGTQDCQFRDRYHK  
 Anneissia MTFIGNEGVFISRL-LMKAHRVYSLFIMNLCAADFLMSIYLF TIAAODYRFRD VYNQ  
 Apostichopus LTTCCGNLNVFISRI-AIHAENKVH SIVVSNLCAADFMMGLYLF AIGIQDAREFN NYID  
 Strongylocentrotus ITSVGNLGVLVSR A-FMKAENKVH TVVVINLCTADFLMGIYLL IIGTHDVKYRDN YNQ  
 Patiria LCFLGNIGVLISRY-LMKAENRIHSLV VVNLCTADFCMSIYLFVIGYHDAKERNQFNT

■ TM1 ■ TM2 ■

Ptychodera YSHKWMTSWTC SLCGFLAVFSSETLLVLT VVISVQRFCLIA FQTRMIH-FKYSYGVIS  
 Periplaneta EAHSWMTSWKCTV VGMVAMTSSEVSVL IILVFLSMERFLLI AVPFGGHQ NMSMRTTCLS  
 Anneissia NARQWVESTGCKMS GFLAMVSSEVSVL L LALISVERFLCIVFPYEFHR-LKVKEAAVI  
 Apostichopus YALDWSESWGCHFV GFLALLSTEASVLT LTFISLERFFIVAFPYRFHR-LNIKEVVS V  
 Strongylocentrotus HALEWTNGITCKV SGLLAMI SSEVSVL TLMFISLERFY IIVYPYSEQR-IKTRRAIMV  
 Patiria HALEWMOGSACKFAGFMAMF SSEVSVFMLTFISLERFICIVPYRLHR-LTSKEALVI

■ TM3 ■

Ptychodera TAAAWITAAALAA FPLTM-SSENFHYGKNGACFP LDPNDFEAGWQYSVAMFLGLNA  
 Periplaneta LAVIWEIGVCLAA VPMYWINSTRFYGTNGMCFPL-HIDDPFLLGWEYSAFIFLGVNF  
 Anneissia ISSIWA VAGILIAWI PPLAEGYFGNFYGTNGVCFPL-HIHGPRIKGWEYSVAIFLGMNL  
 Apostichopus LILIWIVAFVLAAS PLIFTEYFKNFYGANVCVCFPL-HIHDPRLGWEYSIFIFLGIN T  
 Strongylocentrotus LAFIWEFGTLLAVVPIIPVDYFGNFYGSNGVCFPL-HLHEPRMRGWEYSVVVFLGINS  
 Patiria MTIIWFLGALVAWI PPLISVGYFVDFYGSNGVCFPL-HIHDPWLOGWEYSAFIFLGLNA

■ TM4 ■

Ptychodera VCFCLIVCSYVGMFYSIRETRNAAFK DINLRRRGDMNFAKRFFV FIVLSNALCLVPIML  
 Periplaneta SSLLLI AVL IYAWMFVSIWRTRHATP---ISSV GDFEFVIRFFFIVLTDAGCWAPIFA  
 Anneissia LALILII VSYIGMFISIRTRKAAV---QIGYK GDMTYARRFFFIVLTD SLCWIP III  
 Apostichopus F S F M V I I F S Y C G M F Q S I Q K T R K R T T --- T - L L P G D I N Y A K R F F F I V L T D C I C W L P L A V  
 Strongylocentrotus TAFVAIALSYTGMF LSIRKTRRAAA---QCGMK GDMAYAKRFFFV I L T D S L C W L P I A V  
 Patiria TCFTAIAI SYTGMF ISIQQTRKAAT---HLGRR GDMNYAKRFLFVVM TDALCWLPIAI

■ TM5 ■ TM6 ■

Ptychodera ITAMVFTDIGVP GQVYAWTTVFVVPINSASD P L L Y T L T T V P C K Q G C L G M L D K K L K R Q K  
 Periplaneta LKLVALGRVHIPADLYAWVVVFILP VNSAVNPLLYTF TTPKYRGQLCQLG----CPPQ  
 Anneissia LKVISLNCNIP IGDNLYAWIVIFVLP LNSALNPILYTLSTTTF SOWFLKLL----KIHK  
 Apostichopus VKVLAVADMPVSESIYAWVVIFILPINSALNPILYTLSTTGPFRRVLLQKI----KNRG  
 Strongylocentrotus LKVM S L C N F I I S E T L Y G W I I V F V L P I N S A L N P I L Y T L S T T S F A M W F M R Q L ----KRGK  
 Patiria LKILSLCSYEIPATLYGWIVIFVLPINSALNPILYTLSTTSFTQWFQKHL----KRRK

■ TM7 ■

Ptychodera ESGTRKMLVSSTTGSRSSRDSSGTTRLTSSGS-----SGSPSODT-----  
 Periplaneta TLATKRHSSADTELSRSSSTNRNAVDRRADN---GLYAMLPA RDP AHT-----  
 Anneissia QVS---HNYVTYSPQRTARRKSGIAEENGSTDGMMSYANRPSLQTNCS-----  
 Apostichopus KHT---ETGAIPKNERFSNGTN---DTAGETLRLO--SNLTM-----MGGNKHEANK-  
 Strongylocentrotus FKT---SGCYIGSNVDMSELRG---RIEESGA-FTSYTNMFKRASFFLPTRKHHVSSK  
 Patiria GKS---SNGSLGSKNEFSTTRG---RIGSTTDQPT EYSSIPKRSYDSNNS-----

Ptychodera ---KPCIE M---DTAQPLVQN-----SSVGQIQSGQS-----C  
 Periplaneta -----  
 Anneissia ----DLLSTAI SEDAAEDVRNNTQYKAQHSD-----NEQPAST-YFVTC  
 Apostichopus -----T-----MAENTC-----  
 Strongylocentrotus VEAIPAVSSSVPSRSATTTAMTNNIRPLHTINEGEIVDNHSQSOGNHQLR RTPIVRLC  
 Patiria ---SPVLEEE---QCSTV-----

Ptychodera A---  
 Periplaneta ---  
 Anneissia V---  
 Apostichopus ---  
 Strongylocentrotus DLME  
 Patiria ----

Melibe MEESITPREGSGSEAEESGSTTTATAKLWQHTRARHYLVFLGVMICVALIVVLVCVT  
Drosophila MSIAI-----MPHLPITFTLAAILLAIASNEGAQG  
Periplaneta -----  
Anneissia MEY-S-----DKCRPF TKVLFHCLLVLQLFFSFHL  
Lytechinus -----MNLALLMVVVTSFFDTSLA  
Strongylocentrotus -----MNWAVLMVVVSSFFGTPQV  
Apostichopus ---M-----KTMALICHKILQVLI AALFLGV--  
Holothuria -----MMTNILVFLIISMVTRD--  
Acanthaster -----MRKLRNALRMLFVLHLCA--  
Patiria -----MHKLRNALRMLLILHVCA--  
Saccoglossus -----MNLIGDVRKLYLNTALR-A--  
Ptychodera -----MKKSLRFLILSL-V--  
Shizocardium -----

Melibe ST-----TEK-----AEALTNALGAS  
Drosophila VESATRTAIEAIRTGIGTKPETE IADATEAEAPVREVISLLGIIDGAESDILVPAADD  
Periplaneta -----MFLLOQLF-AVITVTETVGTFF  
Anneissia VL--TC-----RVI-----INTCPDVQEVTSKSPHG  
Lytechinus SH-NTK-----DDHLDDA-----P-VIRHRQAPMSTDPHA  
Strongylocentrotus SN-ATK-----GDDLDDA-----PSLIRYRQSPMTSDPHA  
Apostichopus ---TFA-----GKEVDQS-----VELHRVRRQ---SSSDVHG  
Holothuria ---AVA-----TQGDLDV-----YGARRVRRQ---SNSDNHG  
Acanthaster ---SR-----RAEQDGA-----IIRHIQR---RAVDAHK  
Patiria ---AR-----RVKQDSA-----LRHLQR---RTVDAHK  
Saccoglossus ---VH-----GYSQRQR-----MGRVHQR---IV--RGT  
Ptychodera ---SS-----SVSKRGR-----LGHSPHR---RLPRSFF  
Shizocardium -----

Melibe RCPNTERCPSDGR CINRTLVC DGRKQCTDGADEGTVCD--KDKMD-----LWSDM  
Drosophila KCPGGYFHCNTTAQCVPORAN CDGSVDDASDEVN---CVNEVD--AKYWDHLYRKQ  
Periplaneta LCKEQEKCNKSRLCVPQDRN CDGIPDCPKSDEWD---CSDKLG--SQFWDHLYRKN  
Anneissia DCPGFREP CQNSSQCVPGNFI CNGISDCDNGSDELP--EECATNNPLYTNIWTHIYGSE  
Lytechinus HCGE-WEP CINSTQCIPQEAIC DGNIDCDNESDES--EEDIDDKN--RRVYTFMDQGK  
Strongylocentrotus HCGE-WEP CINSTQCVPQEAIC NGI FDCDNKMDSD--EEDIDDIN--RRIYTFKDQGK  
Apostichopus HCQVTEEP CGNSTECVLOSKH CDSVVD CANGADEDE--EDDDMDN--TNNFDFLFGKK  
Holothuria HCGL-DEP CGDSMCVVTOSQQ CDGVADCDNGADEEE--EEDTEDD--YRHFDEIIGRK  
Acanthaster HCGK-DEP CLNSTQCVPQDSI CDGTPDCDNGSDEWEVEE CRDWNL--AKMWNFFGTK  
Patiria HCGV-DEP CLNSTQCVPQDAI CDGTPDCDNGSDEWEMEE CRDLNL--AKMWDFFGTK  
Saccoglossus CSGI-QVK CTNSTQCIFRDQL CDDHVD CDNGSDEWS--SECTEDD--NTNWDILIGOK  
Ptychodera CLDN-SFK CLNSTDCIFREYL CDGIED CDNGSDEWD--EECTDYND--GENWDIKIGDK  
Shizocardium -----

LDLa

Melibe FNKRLDADR-----  
Drosophila PFGRHDNLR-----  
Periplaneta PSAELDEED-----  
Anneissia RRGGDGDSDEED-----  
Lytechinus TDSSEEDD-----  
Strongylocentrotus QDSSEED-----  
Apostichopus ED-S--EER-----  
Holothuria EE-L--DEL-----  
Acanthaster NDDSGEEDDLDQGLRPQ---QTVFDAHGHCGEEFP CMNSTQCVPREAI CNGKPCD  
Patiria D-ESGEEDDQGLSPDPLPQRSFDAHGHCGEDFP CINSTQCVPQEAICNGEPD  
Saccoglossus SDSEEEED-----  
Ptychodera DDESSEEGEDD-----  
Shizocardium -----

LDLa

Melibe -----EKEAKNCVWDKIESRCVCR-----  
Drosophila -----IGEC LWPNEFSCPC-----  
Periplaneta -----L-VCELMINSSECAC-----  
Anneissia -----FNPDNVCENGTYPPNCTCYLKCISRH  
Lytechinus -----FIPPACDIGTYPEECRCVLLYEDPM  
Strongylocentrotus -----FIPPACDAGTYPDVCRVLLHEDPM  
Apostichopus -----PPPVTCTDTIFPDECECFVVFDEES  
Holothuria -----PPREPCNGTVHPPECKCFVVAEE--  
Acanthaster NGSDEEEIV-CRNKKM-----RDNIEDIRQEIPEEGTFPES CDFVEIEQTR  
Patiria NGSDEWELEE CRDWNLAKMWDFFGDKAEDEDVRRREIPCEKGTFPES CDFVEIEETR  
Saccoglossus -----NESETIECDNGSYPEECNCTHIFILREN  
Ptychodera -----LGGSRIPC AKDTPNVNCTYIEFENG  
Shizocardium -----

```

Melibe -----EKGKLYC---RD
Drosophila -----RQDEILC---RF
Periplaneta -----VERSVLC---NN
Anneissia GGN-----A-----DDGCESEVFCYTTENT
Lytechinus AHF-----DYYES---MLQDA--YP----SVFAEPPIGATSEPLGLEIAC---TS
Strongylocentrotus VNF-----DYYES---LQDV--YP----SAFADPLFGESGEPMGLEIAC---TS
Apostichopus -----GLENDEPIGLQLDC---QL
Holothuria -----GEIIGLELLC---PQ
Acanthaster TAEPLSLASPYNTTGDASTYRDA--YDIDSNSTDGVRYGSEVRGVVIGIRLDC---RA
Patiria -KDLPSLASPFNATGDASMGAGVDDVGTETNVTDGIPYGLGVQGVVGVRLDC---SA
Saccoglossus GFM-----TSE-----N-----QFYTIIDTRLDC---SH
Ptychodera HNA-----TSR-----SDE---HPNDNSPYAIHIDC---SD
Shizocardium -----

```

```

Melibe QDLSATAHPLPQYT-SVLELSGN-ITSTSRLSIGRLPSLHTIIVIHRSRVEKIGALTEFD
Drosophila QQLTDIPEERLPQHDLATLDLTGNFETIHETFFSELPDVDSLVLKKFCSIREIASHAEFD
Periplaneta MGLTLPPLLPARGIELDLTGSSFPVLNATIMDTLPDLEILVLSHAGIKEIQQEAFS
Anneissia TGFTTVPRDLPTNT-VLIDLSDNYTSVVRKGDLDHLPYLRTLYFSRNRNLRFESDAL
Lytechinus KRLERVPEGLPPGT-LYMDLSDNRITHLHGDSFQNLTRLRELVIITHNQMQSMDEDVVEY
Strongylocentrotus KQLDRVPEALPADT-LYLDLSDNRITHLHDDSFKNLTMLRELVIITHNQMQTMDEDVVEY
Apostichopus SELESVPDNLPRDT-VYINLAGNSLSNITVETFKTLTKLRRDLQSNRIGSLHPDSEF
Holothuria SGLTSVPRGLPRET-IYINLAANEITTDKDSFDEVTSLKKRLLYQSNKISILHPQSLN
Acanthaster KQLTNVPRNLPNNT-ISLDLSDNKITHLTKKDLTNLPQLRQLLSRNKLRMEEGAFK
Patiria RQLTEFPRLPNKT-ISLDLSDNKITSLTKKMEHLTHLRQLLSRNKLRNVEEGTEF
Saccoglossus RNLTSTPGGIPPNI-TKINLRYNSIQEVKAGDLYGLYDLTELLSRNIINDIAERALD
Ptychodera RNLTAVEQNIPDNT-TEIDLSONSIETIRKADFAGLFMVKNLLSKNSIREIEEGSEFD
Shizocardium -----MIQIEIGSEDLGGLVMLRELLLKKNNLTKLNSSSLS

```

LRR

```

Melibe EC-----
Drosophila RQAD-----
Periplaneta KA-----
Anneissia -----
Lytechinus DTR-----SLEMLDL
Strongylocentrotus DTT-----SLEMLDL
Apostichopus QLR-----SLEMLDL
Holothuria KLL-----KLEILDF
Acanthaster PLT-----
Patiria SLT-----
Saccoglossus HLANLMVLDLEANKLKTLPESVFSFLNNLVDLDLSKNDLGTLPYIYFKNLNKLQKMDL
Ptychodera DLRDLLILSLDRNKLTSLPASVFQVTNLRLELSLELNDISNIPDTVFQNLGHLLEEDL
Shizocardium DLVNLEKLAIESNKLTTIPVDIFSKMKNVQILTLAKNDLQHLFVGVFASLRRLEEDL

```

LRR

```

Melibe -----PSTANVHFTFNKLSRFS
Drosophila -----NPLRRLYMDDNKLPHP
Periplaneta -----PSLHTLYLDNNQLRTP
Anneissia -----NNLTISELNLVGCQMGTI
Lytechinus SDNRIERTITSAHFDSLRRSLRLSRNH-FRCEGDGCFRNLSVSLRELELVACGITELT
Strongylocentrotus SDNLIETIITAAHFDNLQKLTLLRLSRNH-FRCEGGDCEFRNLSVSLRELELVACGITELT
Apostichopus SNNRISSLSKEYFLFNGILKELLKHNPIQRLEDAELFINLQMLETLDFFGAQISELR
Holothuria TNNKISWLGSQLQQLFSLKELTLKHNPIRRLNDSDMFRHMYSLQTLNFLGAQISELR
Acanthaster -----DLETLRMIACDLEDVQ
Patiria -----DLQTLRMIACDLEDVQ
Saccoglossus SGNEIRLI-QSEFLFGQGSLDVLHLGWNRPLEISEHAFSALRNLTRMRLLDNGLSHLR
Ptychodera SGNEIRLL-GKNLLRNQVTLKKLQINWNRPMIEFGAEDNTVNLNTRLRIDNGISHIR
Shizocardium SGNELRRL-DKDLFENQSGLKTLLQLNWNKPLELEFGVFDRLKDLQIETGLLDTGLSHIR

```

LRR

Melibe SSVFAKRNSIYYLNLMGNAIKE L TSGDFRRMKS LKKLDLRDNKITS TDEGVFEDTPHL  
Drosophila EHFPEGNQLSILILARNH LHH LKRSDFLN LQKLQE LDRGNRIGNFEAEVEARLPNL  
Periplaneta EPALQPGNILLDTLILRNNE LSKLPKN AFLN LQYLRE LDRHNHLADVDGDVEQPLVRL  
Anneissia DGLFSGM SHLMTLHLQYNN LVT INKDTLKG L D W L M E L N L N H N E T S D L N P M A E N H T P N L  
Lytechinus PDMFRNLHSLSVLQLSYNAITE I T P S H M N G L E G L Q D L Y L S S N H I S H T E N G S F D G M D R L  
Strongylocentrotus PDLFSNLHSLSVLQLSYNAITE I T P S H M N G L E R L Q D L Y L S S N H I S N T E H G T E D G M D N L  
Apostichopus TGVFSPLENLRKLVLAHNEIEAL T Q G N M E G L R N L L E L D L Q N N E V S F T E D G T E K E M P M L  
Holothuria TGI F E P L T K L T R L V L S H N Q I E A L T Q G N M A G L S S L Q T L D V Q S N D I S F T E D G A F I E L S L  
Acanthaster QRMFAAQKRLVTL D L R Y N K I T R L V K N S L F G L R N V K Y F D I R G N Q L S E T E T G V E D T P K L  
Patiria PRMFATQNRLLVTL D L S Y N I L T R L V R G S L F G L H N L E Y L D I R G N R L A E T E T G V E K D S S R I  
Saccoglossus SGMFRNLNRLKEL D L E R N Q I L S T K K Y D L Q G L T D L S H L K L K N N T I R R I E D G A F D H T P S I  
Ptychodera SGI F R N L N K L T K L D L E R N F I L S T K K Y D L Q G L H N L S S L Q L R N N S L T R I E A G A F D H T V K L  
Shizocardium SGI F C N L G K L T K L D L E R N K L L S T K K Y D L E G L D N L K D L L L T N N T I Q R T E S G A F D H V G K L

LRR

Melibe ISLDMRGNL L T E L V P G M F - D G L Q D L R K L Y L G N N A I A E I A P C A F A S L S K L R A I N L A R N R  
Drosophila EVLYLNENH L K R L D P D R E P R T L L N L H T L S L A Y N Q I E D I A A N T F - P F P R L R Y L F L A G N R  
Periplaneta EILYLNENRL D S V P L - - - S L P L P S L Q L L S L T H N H I A W I E P G A F S Q L P R L K H I Y L S W N Q  
Anneissia VILNIQYNK L Q V L S P P L L - E P L T Q L K T L G M S F N Q I S E I K N G F F E S Q T H L Q D L L M G N K  
Lytechinus LKILLHDNK L K N I S V G V F - P F M P E L V I L K L D E N E I D M I E P G S F S L V M N L Q H F T L M E N K  
Strongylocentrotus LKILLHDNK L T N I S V G I F - P V M P E L Q I L K L D E N E I A I E P G S F A L I E N V Q H F T L M K N R  
Apostichopus NELRLHGNK I H E V K Q G M F - E D L A N L T I L L L D Q N L I H T I E P G S F S K L F K L Q H I T M S N N M  
Holothuria EE L R L H G N K L T K V K R G M F - T N L A Q L R T L L L D Q N E I E S I E P G T F A E L T N L Q H F T I S D N L  
Acanthaster YFMLVSONK L S S I P A N L L - R P L R E L R T L D V H R N D I S V I E T G A F S T N T K L I E I N L R D N K  
Patiria YFMHISQNR L S S I P A E L F - R P L R D L R S L N I H R N D I S S I E C G S F S T N T K L R D L N L G D N K  
Saccoglossus SE L W L S M N D L T E V K R S V F - L P L K N L K T L D L S F N K I E F E D G A L S N S V I L A I L L L A G N R  
Ptychodera Q L R L S L N T L P A I K K D V F - E P L Q E L K I L D L S H N K T E D I E S G L S N S T R L S H L L L A S N K  
Shizocardium E T I G L S F N D L V E I K K D V F - S P L K E I R S L D F S F N K I Q R I E T G A F A N S R L M T H L F I S D N N

LRR

Melibe I R S L R D C G L D G L G N I T T L D L H Y N G M H T I E S H A F K S L V S A R S V D L R S N H L I S I G N C T E S  
Drosophila L S H I R D E T F C N L S N L Q G L H L N E N R I E G F D L E A F A C L K N L S S L L T G N R F Q T L D S R V L K  
Periplaneta L W L R N D T F D N I P E L L S L S L N G N K I R L L E V N T F K E V P L L T S L Y L Q D N Q L K L L D S R V L R  
Anneissia L T V I K V G M F Q N L Y G L L S M T L R E N N I R E V Q A N S L D H I E S L Q S L S L A K N P F E S L P D H V F C  
Lytechinus L S R I E L G M F D G L E N V T D M S L R Q N E I K A I E E N A F D N L I R L D H Y - L R E N K L T E V P R E L F T  
Strongylocentrotus L S R I E V G M F D G L G N V T D M S L L E N E I K V I E E N A F D N L I K L E S L D L Q K N K L T E V P R E L F T  
Apostichopus L T H L T V G M F D G L S V S S L S Y A N K I T E M E N G T F E P L I K V S S L N L K D N L F R V P R G I F D  
Holothuria L T H L P V G M F E G L S R V S L G L F D N H I E T M E N G T F A P L N N V E S M L R E N P F R I V P R G V F D  
Acanthaster L T E I R R G I F H S L T S T I T L S L S N N S I R H L E Q D A F A G M N L Q T L K L T K N P F T S L P V G T F D  
Patiria L T E I K R G L F H N L T S V I T L S L R N N S I R H F E E D A F A G M N L Q T L K L N Q N P F T S V P I G I F D  
Saccoglossus L P F V R T G M F A N L T K V S N L P L F D N E I A W F D A D S L Q D M E S L R T L D L Q H N P V O R L P M V I F D  
Ptychodera L S I L R N G M F T S L S S V T N D L L D N E I R S L E P G C F D D M L S L Y T L D L R E N P F T L L P R G L F D  
Shizocardium L H D I R I G M F S G L A T V T N M E L N N N D I E V V E A G A F D D M T S L Y T L D F Q K N P F T R L P R G I F D

LRR

Melibe YMH-QLHYIYFDK F H M C L Y A Q H S Q Q C L P L G D G I S S K E N L L E S I V L R I C V W V V A L L S L G  
Drosophila N L T - S L D Y I Y F S W F H L C S A A M N V R V C D P H G D G I S S K L H L L D N Q I L R G S V W V M A S I A V V  
Periplaneta H L Q - N L E H I Y F D E F K L C S A A L H V R V C E P K G D G I S S L Q H L L D S I V L R A S V W V M A V L A C A  
Anneissia A M T N T L D T I E F D S F S F C G F A P H A R H C Y P S T D G L S S R D H M L K S V I L R I S V W I V G S I A L F  
Lytechinus P L E - N L N N I Y F D Y F F M C G Y A P N V R V C L P K G D G I S N V D D L L G N W L L R G A V L V A L L G S F  
Strongylocentrotus R L K - N L N N I Y F D E F F M C G Y A P N V R V C L P K G D G I S N V D D L L G N W L L R G A V L V A L L G C F  
Apostichopus V M P - M L G H I Y F D H F F L C G F A P H V K D C D P K S D G L S T S E D L L G S I V L R V A V W L V S I L A S F  
Holothuria V M P - K L S H I Y F D H F I L C G F A P H V K D C N P K G D G V S N S E N L L G S I V L R V S V W M V S I L A T F  
Acanthaster Q L I - S L K A I Y F D H F S L C G Y A P H V R L C M P K S D G I S T A E N L L G N I L L R F A V W F V A L L A S L  
Patiria K L R - S L K A I Y F D H F S L C G Y A P H V R L C M P K S D G I S T A E N L L A N N L L R F A V W F V A L L A S L  
Saccoglossus D L P - S L E W V H F D H F W M C G Y A P T V R H C T P R G D G I S S E N L L D N V L R V M V W V V A M L A F V  
Ptychodera N L L - S F E W I Y F D H F S L C G Y A P T V R H C S P R G D G I S S I E N L L D N M V L R I M V W V V A T L A F I  
Shizocardium K L G E S L Q W I Y F D H F S M C G Y A P T I R H C E P R G N G I S S I E N L L D N M V L R I M V W V V A L L A F I

TM1

Melibe G N M V V F L G R F - L L R E D N Q I H S F F I K N L S M A D L L M G L Y L L I I A I H D I K F R G O Y I L H D E S  
Drosophila G N L L V L L G R Y F Y K S R S N V E H S L Y L R H L A A S D F L M G T Y L T L I A C A D I S F R G E Y I K Y E E T  
Periplaneta G N T V V L L G R L V A R E - P N P V H S L Y I K T L A L A D L L M G I Y L M I I A S A D W H Y R D V Y V R H D F Q  
Anneissia G N L F V L T T R L F V N E - T K R V H A F L I M N L A F A D L L M G I Y L Y L I A I H G A L F R D N Y I L Y D I V  
Lytechinus G N L L V I L A R C F V S E - D N K V H S F F I M N L A V A D F L M G L Y L L I I G L H D V M F R G E Y I F K D L N  
Strongylocentrotus G N L M V I F A R C F V S E - D N K V H S F F I M N L A V A D F L M G L Y L L I I G L H D V M F R G E Y I F K D L D  
Apostichopus G N L I V L F A R C V S K E - D N K V H S F F I I N L A I S D F L M G A Y L F I V A H D V M Y R G V Y I L H D V D  
Holothuria G N L V V L F A R C L S K D - D N K V H S F F I I N L A V A D F L M G A Y L F I V A H D V M Y R G V Y I L Y D L D  
Acanthaster G N A F V L L A R C F V N E - D K K T H S F F I M N L A V A D L L M G L Y L L I I G I H D V I F R G S Y I L H D L T  
Patiria G N A F V L L A R C F V K E - D K K T H S F F I M N L A V A D L L M G L Y L L I I G I H D V I F R G V Y I L H D L A  
Saccoglossus G N L F V L V A R C I L K E - D N R I H S F F I M N L S L A D L L M G L Y L F I I A L H D V M Y R G E Y I K F D L E  
Ptychodera G N I F V L I V R C V L K E - D N R V H S F F I V N L S F A D L L M G L Y L F I I A V H D V I Y R G E Y I K F D L S  
Shizocardium G N I F V L I A R C I L K E - D N R V H A F F I M N L S F A D L L M G T Y L F V I A I H D V I Y R G E Y I K Y D L S

TM2

Figure S13-continued.

Melibe WRNSWECDFAGVLSSTLSEMSVLTLSVITLDRYISIMYPLSLRRRGLRVAYFVMAITW  
Drosophila WRHSGVCAFAGFLSTFSCOSSTLTLTLVITWDRLMSVTRPLKPRDTEKVRIVLRLLLLLW  
Periplaneta WRHSPVCNACGFLSTLSCASVLIILTLITRDRLVSVTRPLDRRQPSLRHATLLVAVLW  
Anneissia WRSSDICTIAGCLSILSSMMSVFTLSVITLDRYVSVIVHPFSEYESKSLFRAAILMGVLW  
Lytechinus WRSGWVCRMCGLLSLLSSEM SVLTTLTVITSDRFISIVHPFKFRQRHLAHAVILMVAFW  
Strongylocentrotus WRSGWVCKMCGLLSLLSSEM SVLTTLTVITSDRFISIVHPFKFRQRHLAHAVILMVGFV  
Apostichopus WRSSWVCQLCGAFSLLSSEM SVFTLTITADRYFCIVHPFRFRSRNLIPAAILMGCLW  
Holothuria WRSGWVCQCGAFSLLSSEM SVFTLTVITADRYFCIVHPFRFRSRNLIPAAILMGVLW  
Acanthaster WRNSSVCKLSGFLSLLSSEVSIMTTLTVITLDRFLSIVHPFRFKNRSLVHARLLMVFLW  
Patiria WRTSSVCKLSGFLSLLSSEVSIMTTLTVITMDRFLSIVHPFRFKNRSLVHARLLMVLLW  
Saccoglossus WRLGWVCQCGFLSLLVSEASVLTLLAIIITMDRFLSIVHPFKFKNRRNMKIAVFAMLLIW  
Ptychodera WRTSWICKLGGFLSLLVSEASVLTTLTVITLDRFLSIVHPFKFKNRTIKLAFLLIMATMW  
Shizocardium WRLSWVCQLCGFLSLLVSEASVLTTLTITLDRFLSIVHPFKFKNRRNLKLAFFWMLMVW

**TM3**

Melibe TVCIM-LVSLPVMG--LEYFGDSFYRDNVCTPLHLHHPRAK GWEYS SFLFLGINFCS  
Drosophila GISFGL-AAAPLP--NPYFGSHEFYGNNGVCLSLHIDHPYAK GWEYS ALLFILLVNTLS  
Periplaneta LVAADV-AAAPLCAETVEYFGEFFYGGNGVCLPLHVQDPFAD GWEYS AAMFIALNTVA  
Anneissia LFGITL-VLIPIM--KQTFGELEFYGSNGVCLPQIRHPWATGWVFTTTLFVGLNSVF  
Lytechinus LAAMLI-AILPVLH--RSYFGEFFYGGNGVCLPQFDRPFDHGWEFTLVVFFLNLIA  
Strongylocentrotus LAAMLI-AILPVLH--RNYFGEFFYGGNGVCLPQFDRPFDHGWEFTLVVFFLNLFA  
Apostichopus IIGITL-SILPLH--RSYFGDEFYGGNGVCLPQFDRPFDHGWEFTLVVFFVANLLS  
Holothuria LLGITL-AMLPLVY--KTYFGDEFYGGNGVCLPQFDRPFDHGWEFTLVVFFVIANLLS  
Acanthaster LLGIAL-ATIPLH--TAYFGEFFYGGNGVCLPQIDQPFADGWEFTLVVFFVFNLVA  
Patiria LLGVAL-ATIPLH--TEYFGEFFYGGNGVCLPQIDQPFANGWQFSLVIFVFNLVA  
Saccoglossus ISCVII-ATLPLID-AITYFGDEFYGGNGVCLPLHIDDPKADGWEYSLVIFVFNFMA  
Ptychodera SICIFL-AVLPLID-HLEYFVFFYGGNGVCLPLHIDEPMTNGWEYSLFIFTFINLVA  
Shizocardium IACVFL-AILPLIH-VITYFGAFFYGGNGVCLPLHIDEPKAN GWEYSLFIFVFNFVA

**TM4**

**TM**

Melibe EAFIAYAYVAMEYSIHMSALPLRSTRDSKERCLVQRFFIVLTDQVFCWVPIIILKILA  
Drosophila LIFILFSYIRMLQAIRDSGGGMRSTHSGRENVVATRFIVITDCA CWLPIIIVKLA  
Periplaneta LLFISFAYWRMLRVVRS SGLSLRSTQERODKAVAQRFVIVATDCLCWPIIIGVLA  
Anneissia ELFVVYAYIAMEVMIRSD-DVRSTKKS QDSAILVRFTLLVFTDMLCWLPIICVIVLA  
Lytechinus FIFILYAYARSKAIPRMNKMGRSTKES QDWNLLKRFTIIVATDFICWMPPIIVKIAS  
Strongylocentrotus FIFILYAYAQMFAVRKKS LAMRSTKES QDWNLLKRFTIIVATDFICWMPPIIVKIAS  
Apostichopus ETFIVWAYIRMEFTIRRSNLAARSTKVS ODYALLKRFTIIVATDFICWMPPIIVKFVT  
Holothuria ETFIVWAYIRMEFTIRRSNLAARSTKVS ODYALLKRFTIIVATDFICWMPPIIVKFVT  
Acanthaster ETFISYAYLMMEMTIRRSNLAARSTKKN QDWALVKRFTLIVATDFICWMPPIIVKFVA  
Patiria EAFISYAYLMMEMTIRRSNLAARSTKKN QDWALVKRFTLIVATDFICWMPPIIVKFVA  
Saccoglossus ELFIVFAYMAMETS IKKSRSNIRSTKEN QDLLLVKRFTLIVATDFICWMPPIIIFKFAA  
Ptychodera ELFIAFAYAMENAIROSRTNIRSTTEN QDYMLAKRFTLIVATDFICWMPPIILKLVA  
Shizocardium EVFISEFAYVAMESSIRKSRNIRSTKEN QDLVLVKRFTLIVATDFICWMPPIIVKFVA

**M5**

**TM6**

Melibe LSGVALTVDLYAWVIVFVILPVNSALNPILYTLTTOYFKKKLFSKFSAVVFRPVLRS D-  
Drosophila LSGCEISPDLYAWLAVLVLPVNSALNPVLYTLTAAAFKQQLRRYCHTLPSCSLVNNET  
Periplaneta LAGARVDQQLCAWLAVLILPVNSALNPVLYTLTTSF FKSQMSRLLHAWKSRDTGPHSD  
Anneissia ISGYPVSGDVYSWLAFLVLPVNAALNPILYTLTTSKLFROQLR---IILHKRRATGY  
Lytechinus YAGIVIPQSVHAWFAIFVLPVNSALNPILYTLTTOYFRQKFLRPIRRICGRQKQKAY  
Strongylocentrotus YSGIALIPQSVHAWFAIFVLPVNSALNPILYTLTTOYFRQKFLRPIRRICGRRQKQKTY  
Apostichopus YGGVALPPAAHAWFAIFILPVNSALNPILYTLTTOYFRKRMIFHPSRTFMGKQKSTAGH  
Holothuria YGGVILPPTAHAWFAIFILPVNSALNPILYTLTTOYFRKRMIFHPSRALMGMSKSAGGN  
Acanthaster LGGVSVSOSVYAWFAIFVLPVNSALNPILYTLTTLVLFROKILAPLGIKAKRK--KGY  
Patiria LGGVSVSOSVYAWFAIFVLPVNSALNPILYTLTTLVLFROKILAPLGIKAKRK--KGY  
Saccoglossus LAGAQLISGGVYAWVAVFVLPVNSALNPILYTLTTLKMFQKQFMKLLGISNKKKN--AG-  
Ptychodera LAGVKVNGDIYAWMAVFPVNSALNPILYTLTTLKMFQKQMLRALGVHLRD----KA-  
Shizocardium FAGAKLNGDVYAWIAIFVLPVNSALNPILYTLTTLRMFKQKMLRAFGVATK----KE-

**TM7**

Melibe -----KDS-----N-----QSRSSMKNNNTLYSRHMHD  
Drosophila RSQ-----TQTAYESGLSVSLAHLGGGVGGGSGRKRMSHRQMSYL-----  
Periplaneta SAG-----SLSNIQLSTRKRHLGSPPTRSSTL-----RSHSSYKSIRGT-  
Anneissia RRG---RRDDSDSFKRSGTRLSLI--PVRSKASLKS KSS--IDKTKSNS-----  
Lytechinus QSG---SYDDSIITGTKITATKLSII--SHNGKPRAGSVNG--RLNSTKGS HGHHRP--  
Strongylocentrotus QSG---SYDDSIITGTKISATKLSVI--SHNGKPRAGSVNG--RLISTKGS HVHHRP--  
Apostichopus EMSQSMSRTRDREIGHTATSRLSVI--SHSNTMKNGT-----  
Holothuria DMSQSVSRSRDREMGNATSRLSVI--SHSHQMKNGGGTA--TPG-----  
Acanthaster ITG--VSVDETSTMSKNSGTRLSII--SNKS--RGGSLNG--R-----FNSQ  
Patiria LTG--ISVDDTSTMSKNSGTRLSII--STKS--RGGSVNG--R-----FSSH  
Saccoglossus -----DESYSAKTTGTRLSV--ASSR--NRISLNG--NIKIYYSIPFICSTI  
Ptychodera -----DESLTASKTTGMRVSTF--GQR--SRSTTST--NGKARNGSFHDNVQDN  
Shizocardium -----DDSFTASKTSGTRLSST--GSR--TRISISA--K--NSNGSIGTRATSL

Melibe LEMDLLRRYGNASRSGT----QTTTTTLSTSR---IPHNGKATSVRPRAQSDNALNIR  
Drosophila -----AV-----  
Periplaneta -----AV-----  
Anneissia -----AV-----  
Lytechinus ---SEVQPWLPDSSGRP SHLKRPSLRMEDMSCRKE-----PEVVV  
Strongylocentrotus ---SEVQPWLTPDSSGHP SHPKRPSVRVEDTSCREE-----PEVVV  
Apostichopus -----PTTPRNG--HMENLSHED-----  
Holothuria -----GTPAAERNA--HMENMSNDD-----  
Acanthaster KKLKNLSSLDSTDESVTCSAAQTT---SLKIKKHRA-----A-TAD  
Patiria KKLKNFDSLDSSESVICTATKTT---T---KKRA-----V-TVE  
Saccoglossus FRLKTI LFFIIKKS DTPAS--STT---LRDIKLAAA-----PKSLR  
Ptychodera -QFDRDVAFDNQ GADMS-----GEPIALSVQ-----AEHLR  
Shizocardium RTTSREQTYPVKDCNYV-----ELTTIYTP-----PE---

Melibe PNVGNA---SQPISNI-----  
Drosophila -----  
Periplaneta -----  
Anneissia -----  
Lytechinus VHSNSQN--RIECS DVAEPLIET-----  
Strongylocentrotus VHSNSQN--RIESS DVVEPLIET-----  
Apostichopus ---NTNN--EDRDQNMDSPE-----  
Holothuria ---NKKE--RNEE--MAAL-----  
Acanthaster YHELPTSDP-DCAPSGVND DME-----  
Patiria YHQLPVSDS-DERPLASTVT-----  
Saccoglossus RTLIEQGDGSSEVRSAAAIEIQRAWRGYWARWS  
Ptychodera GTE-----  
Shizocardium -----



Apostichopus ---MMRILOSVVFLAII LLM-----VVNISQSSPPD C-EETDIEF  
 Anneissia ---MEH---RLVPMIIAIAWISLC-----VVSKSELHGSVS C-KSTDVK  
 Strongylocentrotus ---MMMG-RQAFIFLVIGIA-----LVDIVAGVNLQV C-DVEVEFE  
 Patiria ---MR-LT[S]ILLVVFII SLFLA-----SDARLRNKDETTSCENEADFE  
 Ptychodera ---MGRYLGSCRFFLYVIWFS-----VTVAETQHQQV C-DIDTELE  
 Periplaneta MLFQLLPNKASLVFVICIQIYYICSSSTNEPVLGSGVMHGAVPGGSVMP C-NSSEAVEFH  
 Lymnaea ---MA-TMSGTTIVCL---IYLT-----TMLGNSQGVNLKIESPSPPTL C-SVEGTFH

LDLa

Apostichopus CDN---KCLNVTMQCNNVYDCVGGEDDESFLICGCRHDEFQSD-GCTPLHERCDLNC S  
 Anneissia CGT--GE CVAANSS CNSISDCPDGSDSPAYCGCRHDEFQ CYN-S C ISLFGRC DGTCD  
 Strongylocentrotus CEP--GV CIPRNLTCNGIFDCELGQDEEVAF CGCAKDEFPC SH-S C IPIELRC DNTNC D  
 Patiria CEP--GV CIDASLANCSAYDCESMADETVML CGCPSGEFRCLN-S C IPLEKRC DRHCD  
 Ptychodera CSP--GV CIDLQYRC DGI PDCENGHDESTLV CGCPSHEFR CNETT CIDLIRRC DWSMD  
 Periplaneta CDA--VV CVPKSSLCNGIPDCQDGRDESVAQ CGCLPNEFRCSN-S CVDLVRRC DRQPD  
 Lymnaea CDDGMLQCVLMGSKCDGVSDCENCMDESVEFCGLQSEFCNHTT CIDKILRC DRNDD

LDLa

Apostichopus CSS-CEDEDECEGYS C PPTHN-KCK-NHY CIPQINF CDFIDD CGDNSDEEN CNHPP C S  
 Anneissia CDF-CEDEDCDLHQ C PSTHM-KCATSHI CIHLSLQ CNFVDD CGDGSDE-M CEHRE C Y  
 Strongylocentrotus CEVDCADMDCGEAFP CPESTHME-KCTKNHY CIAKHLW CNFVDD CGDNSDEDL CYHPD C W  
 Patiria CQDDCAEDHCDSFQ CLPGFQ-KCE-NHF C MPTYAW CDFVDD CGDMSDEAL CERLD C W  
 Ptychodera CPD-GSDEDN CETFQ CLHTHS-KQNTHK CIPRDKT CDFIDD CGDKSDEED CYRRP C Y  
 Periplaneta CAD-GEDEQDC EAYV CPT-THFKC-NNHF CIPGDSV CNFVDD CGDGSDENK CSHRK C W  
 Lymnaea CSN-GLDERE CDIYI CPLGTHVKC-DNHFCVPRDKQ CDFLDD CGDNSDEKI CERRE C V

LDLa

Apostichopus SMFLFE CENHQCISNAYA CDGIED C FDGSDE R--H C EEN-FHI CEDGNKIHEGRK C N  
 Anneissia T-HEFQ CANGE CLKPGYR CNGEVN CRGGDTSDEDN CIENYDYIM CR-SGRIFRNLFC D  
 Strongylocentrotus K-GEFQ CSNKQCINTWFV CDGSQD CIDGSDE--ARC GEEH-FVL CENCKKVEHEW C D  
 Patiria Y-GQFQ C INQCINSFFL CDGIQD CTDGTDEMEST CSPGN-FAD CGDGTVRVRAQQ C N  
 Ptychodera AYGEFR CENEQCISYIV CDGIND CLDGSDEV--Q CQED-FVT CSDGTQTHRHW C D  
 Periplaneta N-LEFK C NNGE C IRPGFV CDGTQD CKDGSDET--D C GPDQ-FAL CGDGSRVHRYW C D  
 Lymnaea A-TEFK C NNSQC VAFGNL CDGLVD CVDGSDEDOVA C DSDK-YFQ CAEGSLIKKEFV C D

LDLa

Apostichopus MVRDCPSGS-DEHGCEC--QVYQTC PAEKS C FDNDIHCNSF CECAD-----C  
 Anneissia FFIDCELTEDEKONCS DSADGEMCS-TGV CILRSKLC DGCDCDRDL-----C  
 Strongylocentrotus RLVD CPDNEADETNCV C--TADEYRCP-NGK CLRPSVRCNGV C DCLS-----C  
 Patiria GDAK CQLNKAVENCD C--SDDEFRCG-NGK CLPPAKQ C DRL C DCSN-----C  
 Ptychodera GIPDCRESHDDEVNCY C--AEDDFRCG-NGR CISRAYL C DLS C D CAGT-----C  
 Periplaneta GWPDCPDNHADLKCQNC SGVDEELCP-NGR CIRRANV C DSQ C D C VPPGSAAVNVT C  
 Lymnaea GWVDC KLTFADELNCKL C D-EDDFRC S-DTR CIQKSNV C DGY C DCKT-----C

LDLa

Apostichopus SDETNCDEI-----CDV-SNGIY CPWMNYIIGSYRLSG CVKTERFC DGT PDC LG  
 Anneissia EDENN CGDT-----VCSA-GSDYFCA-----HSFRCLNSEFV CNGYND C EN  
 Strongylocentrotus DDEKE CAEDM-----CNYETNGIL CQ-----IANNKPSRCVVRKEYIC DGFDC PN  
 Patiria EDEEG C DNKDD-----C DTD-T HIF C P-----PVDGKPPV C LQKQF ICDGRRDC PI  
 Ptychodera EDEKN CSSG-----LCTL-ENHFWD-----EFSRCLHKDTIC DGFDC FD  
 Periplaneta DDEVDCDLYYTNINGIHLCTQ-TETLNCIEP---NQNRDKDR CIHREFIC DRTNDC QN  
 Lymnaea DDEEV CANN---TYG---CPM-DTKYMC-----RSIYGEPR CIDKDNV CNMIND C RD

LDLa

Apostichopus Y---QDEMF C SVPLHVP-----VRC C---PSTRDPRYIPES-EF C DN--SS  
 Anneissia KDDE---L C ESRYKTD---VGYECKLNSDM CQL---DNNAFCYPT E-IF C ER---RP  
 Strongylocentrotus K--AD- EFN CQL--PGNTTGHCDSEGNPPYMM C DIKDGDPRCLPTLKVQ C DRYRRP  
 Patiria F--GWDEDD C QTLPDGESVASCNVP G---TVS C---GAGDPRCPPSKYVK C DK--RF  
 Ptychodera ---WSDEYGC GDDVNCS---THEYENQMEFFRC G-GVESDDGRCIPER-AV C DY--QR  
 Periplaneta GNYLSDEFGC PDDLVI-----GESIV C-----SDNRSLEKA-LE C DF--KW  
 Lymnaea GNVGTDEYY C SNDSECK---N--FQAAMGFFY C-----PEERCLAKH-LY C DL--HP

LDLa

Apostichopus Y C FQGS EETNC THGERV C SVGQFQ CADS--S C VEE SLR C NGFWD C KDF SDEID C PNYI  
 Anneissia Q C QGGS NGS HCL-VEAL C NSNEFK C TNG--M C IPDYLR C DNIAD C LDHSDELN C ESHP  
 Strongylocentrotus H C MYGFDEETCNATRPC DPEVEYEC PYG--R C IDLTSR C DAQLD C DFD SDEAN C ESFE  
 Patiria D C LTGVDEQNC TV-MPC PPGQH C RRGG--Y C VKEELW C DGYVD C DFD SDEDN C ELFE  
 Ptychodera H C ILGTDESNDERC GHPAC MEDEFQ C NNNGHVK C IPIVOR C D TNPDC LDGSDERN C EDYL  
 Periplaneta D C LEGNDEHG-CV-PDACAEGEYTC KNG--Q C VNSTQR C D LQFD C WDKSDELN C VNEK  
 Lymnaea D C INGEDEQS-CLAPPK C SQDEFQ C HHG--K C IPISKRC DSVHD C VDWSDEMNC ENHQ

LDLa

Figure S14. Sequence alignment GRL101 receptors.

Apostichopus CPNENMFKCRGTGQCLASHQR CNGEVECTYINGT-KEDSDEEN CV--LRD CEENEFR C  
 Anneissia CEE-GMWKCR-EGHCIEEMHR CDYVD CANFGQY-RDASDEEN CD--FES CKNEFC  
 Strongylocentrotus CLP-GTWKCH-SGQCISEKMK CDYTPD CFYVNGT-VDSSDEDK DYKIFG CREGEFC  
 Patiria CPP-GLRKA-AGQCISQRLF CDYHLD CFYYKNSTRDVSDEAH CT--RRQ CREDEFQC  
 Ptychodera CDE-GQLQCNESGQCIHRDML CNFIKN C-----ADNSDEEN CGHVIRN CTEDEFQC  
 Periplaneta CPS-GKKKCVHSGQCVSAAFW CDFIVDC-----PDGSDETD CGEKPPL CGPNQFC  
 Lymnaea CAA-NMKSCL-SGH CIEEHKW CNFHREC-----PDGSDEKD CDPR-PV CEANQFC

**LDLa**

Apostichopus HSGHCIENWRRCYKAPDEHLYCCKDRSHLWD CGQWE CADESQFKCPRDHCISTMSRCN  
 Anneissia NNGRCIDESKCKFRDY--SSEE CRDN SHLRE CEDFE CPA-GYKCKQKSHCIPDFRVC  
 Strongylocentrotus HSGQCIPQDEVCFDST-MKKGCKDRSHLND CANRT CRE-NEFKCRNAHCVNMSDVCN  
 Patiria RSGQCIPASRRCYRDQHDHVQGCADLSHLRN CSDFV CPA-GAFKCARSHCINGTMVCD  
 Ptychodera RNGQCIDLRRCYFDELDDVYGCCKDKSHLIG CNDFE CSA-DTLKCRNGHCVSQSLVCN  
 Periplaneta NNSQCIDASLR CFN-SGNPRYGCADGSHLIG CKNWT CPS-NAFKCRNGPCLNSMVCN  
 Lymnaea KNGQCIDPLQVCV--KGDKYDGCADQSHLIN CSQHI CLE-GQFRCKKSF CINQTKVCD

**LDLa**

Apostichopus GLLDVNVNE-DEA-----NCLMYCHPA----KYPGCFCKGKIFNCSYTGLTQVNIHF  
 Anneissia VHVDCILFYDDEV-----N CYGK GTDFEFYSIPDCI CNDKTVD CNDLKYGTLDKFEL  
 Strongylocentrotus GAVDCIPYWTDED-----F CPHECGP-----A-LMCICNHTQMS CINAGLESFHNFYV  
 Patiria KNVDCLESWDDAPRHGDT CIQECAS-----SGCGSQFDMT CTNIGLNESSFSLN  
 Ptychodera GNIDCGLIWTDEE-----G CSHI CSN-----L--VCMQDDEMN CEDKNLHEIPYF-I  
 Periplaneta HNIDCPGTWEDED-----G CLFACSN-----VEPRCE CRDIHVN CTNLGLVVRPPD-I  
 Lymnaea GTVDCILQGMWDE N-----N CRYWCPH-----GQAI CQCEGVTMD CTGQKLEMPVQOM

**LDLa**

Apostichopus A--DDEVITWIFYFNHNLTV--SALTFGNSTVQNI VHLDLSHNNLQDLPAGLESMMIGL  
 Anneissia ---KDMNIMKFSGT---ELVLESSTFSNVTAITF LDISRNNLMDIGDGYFKDMFFL  
 Strongylocentrotus ---EEQISEINTSGNRIQ---ISNEVLSGLPGLLR LDLSNNSLNDIGNDTEKGLANL  
 Patiria AKDTRLIHFSLPGNNLHH-LLQDPTALEGLTRTIL LDLSDNGVTFTINKAALLNVPNL  
 Ptychodera ---EPGYIKLKLGHNYLGEDPNLSNYTFAKLGRITYLGLLEDNITDTKSFTESNLWRL  
 Periplaneta ---EEETWFHMANNLINS--TFSEDYQLERLRLYLDIRNNSISSIPPLAERNLWRL  
 Lymnaea ---EEDLSKLMIGDNLNLN--TSTTFSATYDKVTV LDISRNNHLETPIYSEQNMWKL

**LRR**

Apostichopus HYLNLYGNGINKLEAQVESGLTNLKQLVLTGNVIQIIEEGSFLGLTSLKVLDDLSHQRL  
 Anneissia QTLILSENKITTLLKKAFAQGLSNLRYLNLTKNIENIEADAFDGLDSLTTLLDLSYQNT  
 Strongylocentrotus RYLNLENNLRVIRKQTEGLEGLQTLRLRGNNIHAIEPHAFEGLRNITTLLDLSNQNL  
 Patiria QTLILADNKITTKLGNQTFESSLQHLRTLILIRGNAMQT VAGQAFGLGLGELTTLLDLSQOKI  
 Ptychodera LTLNLEDNF LTTLRRDTEFGLGNVRSLYLQGNSTIGEIEAHAFKGLSALPTLLDLHGQRL  
 Periplaneta LTLNLQYNCIRILSNSSSEYGLTNL SNLHLQNGIQVIEAMAFYGLSSLILLDLSWQRT  
 Lymnaea THLNADNNTITSLKNGSLLGLSNLKLHINGNK IETIEEDTFSSMIHLTVLDDL SNQRL

**LRR**

Apostichopus IHIGGNFVGLYH LTLNLSNNNLQTV EQGIFLKL DNVHTIDMSHNOINF IHENTFNG  
 Anneissia QRIPINAFYGLRS LKYLTLRGNKLI FIVGGTFNGLPNLRSLDISENTINKIDGRAENG  
 Strongylocentrotus TEIPNAAFVGLYR LHFLLDLSANHTVMVPDGA FYGLYQLKKLDISENAIEVVSRR-TFN  
 Patiria QSINKGAFDGLNKLAFNL SHNRMTDIPRGTF FGLNELKELDISENNKLSQIHAFAFYG  
 Ptychodera QWLHINAFAGLSRLLSNL SHNQIQYIDNGVFNGLSKLLVLVDISHNVVIEIDSKVFEY  
 Periplaneta HNISQGAFAVGLRSLVGLDLSHNEITYLV DGSFNGMPLLSDLSLSSNTIKVISNVSERS  
 Lymnaea THVYKNMFKGLKQITV LNTSRNQINSIDNGAFNNLANVRLIDL SGNV IKDIGQKVFEMG

**LRR**

Apostichopus LTNLEKTIISDELRFCCVAKH---VKECLPEADEFSSCEDLMRNTFLRFNLWVGLVAT  
 Anneissia LPSLDYLYTDEFRCMSEG---VPNCYPEPDAFSSCDLMSNYVLRVSIWVLGVATF  
 Strongylocentrotus LRLLEELITDEYRFCCMARH---VSKCLELPDEFSSCEDLMSNPILRMCIWIIGMIAL  
 Patiria LPKLRVLHTDEFRCMVREMSVETCTPPDEFSSCEDLMANVFLRGSIVVIGIIAS  
 Ptychodera LMELELYTDEYRFCCMAKF---VQKCHPPDPDEFSSCDLMSNVVLRGGIWLGLVIAS  
 Periplaneta AASLTKLV TDEFRCCLARH---VKHCLPEPDEFSSCEDLMSNLVLRICVWVLGVLAT  
 Lymnaea LPRLVELEKTD SYRFCCLAPE---GVKCSPEKQDEFSSCEDLMSNHVLRVSIWVLGVIAL

**Hinge region**

**TM1**

Apostichopus FCNAIVIVTRSGKRRDSRVQSFLLITNLAIGDMCMGTYLLIIAIAIDLNYRGRYAAYESL  
 Anneissia LGNLLVVIWRVTHNRENKVSFLLITNLAAGDFCMGVYLLIIAIVDLTYRGEYIHDME  
 Strongylocentrotus IGNLVVIMWRVNSKRDNKVHSFLLITNLAAGDFMLMGTYLLIIAGVDAYRGDYIVHDKT  
 Patiria IGNLAVIMMRMNNKRDNRVHSFLLITNLAAGDFCMGVYLLIIASVDAFYRGYIYDAQ  
 Ptychodera VGNLVVCFRRLRDRDNKVSFLLITNLAAGDFCMGVYLLIIAIVADTYRGNYIHDKV  
 Periplaneta FGNILVIGWRMRFKHTNQVHSFLLITNLAAGDFMFGSYLLIIAGVDARYRGVYFIHDS  
 Lymnaea VGNFVVVIFWRVRDFRGGKVSFLLITNLAAGDFMLMGVYLLIIATADTYRGVYISHDEN

**TM2**

Figure S14-continued.

Apostichopus WKRSLECFKFAFGLSTFSSSELSVLSLTFITLHRVSSIVFPFRTKDIGESRIVWIMTSTW  
 Anneissia WRSSSWCRFAGFLSTFSSSELSVSLTIITLQRLTSILFPFRSKNMELGWAMKMMALTW  
 Strongylocentrotus WRNSGLCKFAGFLSTFSSSELSVFSLTIIITLHRLSSIVFPFRKDMEEFTRAVVVMCVSW  
 Patiria WRDSALCRFAGFLSTFSSSELSVFSLTIIITLHRLSSILFPFRKDMEEFSGAVRVMVVTW  
 Ptychodera WRQSQFCKIAGFLSTFSSSELSVFTLTVITVDRLVCIVFPFRFNRLFEKGAARLMAALW  
 Periplaneta WRSSELCHLAGFTSTFSSSELSVYTLTVITLDRFLVIIFPFRVRRLEMPKTRLLMALGW  
 Lymnaea WKQSGLCQFAGEVSTFSSSELSVLTLSITLDRILICILFPPLRRLGLRQAIIVMSCIW

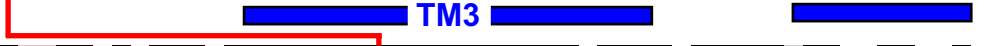

Apostichopus AIVFFFLAGIPLLCFSYFDNFYGRSGVCLALHITPDKPNGWEYAVFVFLALNFFSFTFI  
 Anneissia LLAIFLAILPLCRVNYFGNFYGRSGVCLALHITGEKTSGWEYAVFIFLAINLFSFII  
 Strongylocentrotus GLVAFLLAALPLCGVAYFGNFYGRSGVCLALHITPDKPSGWEYSVFIFLGLNEVFSITI  
 Patiria LMVIFLSAFPFLGLSYFGNFYGRSGVCLALHITPDLKPGWEYSVFIFLALNFSFLTII  
 Ptychodera LIVFFISAVPLFLSYFTDYGRSGVCLALHITNERPDGWEYSVFVFLIINLVNFLII  
 Periplaneta LGAAFISGLPLLQIDYFRNFYGRSGVCLALHITPEKPSGWEYSVFVFLNLSFSII  
 Lymnaea VLVFLLAVLPLLCFSYFENFYGRSGVCLALHVTPDRRPGWEYSVGVFILLNLSFVII

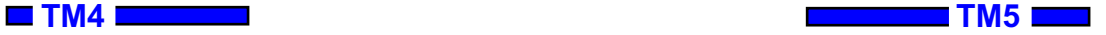

Apostichopus AVAYMVMFYVARRTQQAARSLRGNKGS DAMARKMTLIVETDFCCWPIIILGVASLCL  
 Anneissia ILSYVIMFVARRTORAV--R-PQNRGDSMAMRMTVIVLTFDFCCWPIIFLGLIASLL  
 Strongylocentrotus MVSYGVMFNVARKTOKAAMRSL-KSKGSDSMARRMSVIVETDFCCWPIIILLGLASLS  
 Patiria AVSYSVMFVARRTQKAVNRSR-DTNTGDAMARRMTLIVMTDFVCWVPIILLGVASLGL  
 Ptychodera LLSYIAMFIVASKTQOAV-RNR-DLKTESAMAKRITVIVMSDFFCWVPIILLGLASLGL  
 Periplaneta ALGYLWMYVVARVTQOAV-KKE-QRPSDNAMARRMTLIVATDAACWPIIILLGVLSLGL  
 Lymnaea ASSYLWMFVSAKKTSAV-RTA-ESKNDNAMARRMTLIVMTDFCCWVPIIVLGFVSLA

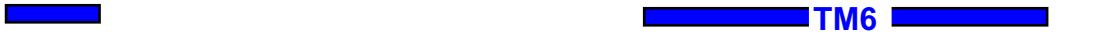

Apostichopus GANIHEPVAWVAVFVLPNSAVNPLLYTLWTAPYARKIINSARSTFGRS--TATTEY  
 Anneissia GASVSEPKVYAWIAVFLVLPNSAANPILLYTLWTSPYVRRFLKKARPSMRSLST-YYTDT  
 Strongylocentrotus GAYVPTS VYAWVAVFVMPVNSAVNPILYTLGSAITVRRAIQRF SINPSTT---VTSEY  
 Patiria GAKIPPQVYAWVAVFVLPNSAANPMLYTLWTAPYVRRVMSRARTSLNLSLSTVTTDM  
 Ptychodera GAVIPPQVYAWIAVFLVLPNSALNPVLYTLSTPTFVKRTKMKMADSIGESFRSRWRDTG  
 Periplaneta GITVPPQVFAWVAVFVLPNSAANPVLYTLSTAPFLGPARRGLTTFKRSCKLSLTMDDQ  
 Lymnaea GARADDQVYAWIAVFLVLPNSATNPVIYTLSTAPFLGNVRKRANRFRKSFIFHSFTGDT

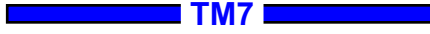

Apostichopus KLSANLSTS-----EKVSSTANGRRRAQRGL-----ASTSN-----SK--  
 Anneissia RHGSVREH-----HRSNGNN---FKMRISQ---RSK-----KTSCLKFIP  
 Strongylocentrotus KTVMN-----NS-SDRKQGGYKGRP--M-RTMSNTANENCKPA----TTTTTK  
 Patiria KQVNH-----GDRQGRMCNGRKGWQKGI-RLPKADANKNAIKLNTIISQSDTE  
 Ptychodera RTNSFTVSESOA-----RSS-----FSYTGIDRLDRCASVA  
 Periplaneta RRTYSSTLGSTFANNCSRCELDYNLYPRLEQTNGKLOEGAGGCHYDGEDLDSEQDMK  
 Lymnaea KHSYVDDGTT--H---SYCEKK-SPYRQLELK-----RLRSLN

Apostichopus -LPPEKSTGSIRS---SDVINDPEEGIRLEHDVSHDKGNVYVNPNNDD-----RLGN  
 Anneissia SSPPKNNNSTTNKRTDAGVITNDEQYNKLLSDQ-RNKDSYE-----RALTSAAGN  
 Strongylocentrotus PKPPPAKEETIKM---IDLGK-----RRHDNGDDGK-----GKEAEGM  
 Patiria PDEPATAQTRSEE---LNLLQ-----DHSPTQGAES-----GKEAEGM  
 Ptychodera SSNSATVAIRLRS-----FS-----GGHGGADLTGCYDKRTGSDPSTRECRDSSGK  
 Periplaneta NEAPLFS-----LT-----KREHOPHRWRSGSYHATNNVPPSSSVSTPG-  
 Lymnaea SSPPMYY-----NT-----ELHSDS

Apostichopus HGNKDAYEKML-----SDKSMDIDGGHSSEE-----G-----  
 Anneissia -----  
 Strongylocentrotus NNEK-----  
 Patiria HT-----  
 Ptychodera SVTFASDSRTWLRRALQAPPKDIKIVEKLEVIIIEFKPEEQSVGAMIIGFLELFSEA  
 Periplaneta -----ATILWQSSSCRHGSSSIDTAVSA-----HGEIIPLRRLHSDS  
 Lymnaea -----

Apostichopus -----  
 Anneissia -----  
 Strongylocentrotus -----TSNNV-----  
 Patiria -----GNV-----  
 Ptychodera QEKHFTRLRDMCLKKLSNDTAHENIIRMLWSGSVSDLLSSQAITEQFPGEFKWCICVE  
 Periplaneta -----RGNGNK-----  
 Lymnaea -----

Figure S14-continued.

Apostichopus -----  
Anneissia -----  
Strongylocentrotus -----  
Patiria -----  
Ptychodera YIEGVTLKTFADKIDTRELSRIVIQIAKALDHLRKHKIVYNNLSTSSIIIQRVGQES  
Periplaneta -----  
Lymnaea -----

Apostichopus -----  
Anneissia -----  
Strongylocentrotus -----  
Patiria -----  
Ptychodera SRKVRPILFDFCKAVDLSVALSTDSEVDHMNDVMGIARMLNDLCTTVMVTTDSEDTD  
Periplaneta -----  
Lymnaea -----

Apostichopus -----  
Anneissia -----  
Strongylocentrotus -----  
Patiria -----  
Ptychodera YERTPLFPMSQSVKRNGLRADDEVLRMCITECATEPPSAFDILNQLTSLMSDPDIVYYV  
Periplaneta -----  
Lymnaea -----
